# Supplementary material for: Manganese-catalyzed selective C–H activation and deuteration by means of a catalytic transient directing group strategy
Source: Royal Society of Chemistry journal article supplement (doi:10.1039/d0cc07675a), 2021-01-01
Supplement: d0cc07675a1.pdf [file d0cc07675a1.pdf]

## Supporting Information

### **Manganese-catalyzed Selective C-H Activation and Deuteration by means of a Catalytic Transient Directing Group Strategy**

Sara Kopf, Helfried Neumann\* and Matthias Beller\*

Leibniz-Institut für Katalyse, Albert-Einstein-Straße 29a, 18059 Rostock, Germany.

E-Mail: [matthias.beller@catalysis.de](mailto:matthias.beller@catalysis.de)

## Inhalt

|                                                                     |    |
|---------------------------------------------------------------------|----|
| 1 General comments .....                                            | 3  |
| 2 General procedure for the deuteration of aromatic aldehydes ..... | 3  |
| 3 Optimization details .....                                        | 3  |
| 4 Characterization data for deuterated compounds .....              | 6  |
| 5 Unsuccessful substrates .....                                     | 9  |
| 6 Functional group tolerance .....                                  | 10 |
| 7 Competition experiments with other directing groups .....         | 11 |
| 8 NMR spectra .....                                                 | 11 |
| 9 Mass spectra .....                                                | 41 |

## 1 General comments

All reactions were carried out in 25 mL Schlenk pressure tubes (FengTecEx) under an atmosphere of argon using standard Schlenk techniques. DCE was purchased from AlfaAesar. D<sub>2</sub>O (99.90%) was purchased from Deutero. Aldehydes were purchased from Sigma-Aldrich, Fluorochem, AlfaAesar, and TCI and stored under argon. Anhydrous sodium acetate was purchased from Fisher. Manganese carbonyl complexes were purchased from Sigma-Aldrich and stored under argon at 4 °C. All solvents and reagents were used as received. NMR spectra were recorded on Bruker Avance 300 (300 MHz) or 400 (400 MHz) NMR spectrometers. Chemical shifts  $\delta$  (ppm) are given relative to solvent: references for CDCl<sub>3</sub> were 7.26 ppm (<sup>1</sup>H) and 77.16 ppm (<sup>13</sup>C), for CD<sub>3</sub>OD 3.31 ppm (<sup>1</sup>H) and 49.00 ppm (<sup>13</sup>C). Multiplets of NMR were assigned as s (singlet), br s (broad singlet), d (doublet), t (triplet), dd (doublet of doublet), dq (doublet of quartet), ddd (doublet of doublet of doublet), and m (multiplet). All measurements were carried out at room temperature. Electron impact (EI) mass spectra were recorded on AMD 402 mass spectrometer (70 eV). The data is given as mass units per charge (m/z).

## 2 General procedure for the deuteration of aromatic aldehydes

**A.** The aldehyde (0.5 mmol), sodium acetate (41 mg, 0.5 mmol, 1.0 eq.) and manganese pentacarbonyl bromide (6.9 mg, 25  $\mu$ mol, 5 mol%) were weighed into a 25 mL pressure-resistant Schlenk tube equipped with a magnetic stirring bar. The Schlenk tube was evacuated and backfilled with argon three times before DCE (400  $\mu$ L), D<sub>2</sub>O (100  $\mu$ L) and *n*-butylamine (7.3 mg, 0.1 mmol, 20 mol%) were added. Liquid aldehydes were also added at this stage. The reaction mixture was subsequently heated to 100 °C and stirred at this temperature for the indicated reaction time. The resulting suspension was diluted with DCM, washed with distilled water (20 mL), and extracted with DCM (2x 20 mL). The combined organic layers were dried over sodium sulfate and concentrated. The deuterated products were then purified by silica gel column chromatography.

**B.** The aldehyde (0.5 mmol), 4-chlorobenzoic acid (39 mg, 0.25 mmol, 0.5 eq.) and manganese pentacarbonyl bromide (6.9 mg, 25  $\mu$ mol, 5 mol%) were weighed into a 25 mL pressure-resistant Schlenk tube equipped with a magnetic stirring bar. The Schlenk tube was evacuated and backfilled with argon three times before DCE (400  $\mu$ L), D<sub>2</sub>O (100  $\mu$ L) and benzylamine (11  $\mu$ L, 0.1 mmol, 20 mol%) were added. Liquid aldehydes were also added at this stage. The reaction mixture was subsequently heated to 100 °C and stirred at this temperature for the indicated reaction time. The resulting suspension was diluted with DCM, washed with an aqueous saturated solution of sodium bicarbonate (20 mL), and extracted with DCM (2x 20 mL). The combined organic layers were washed with water (20 mL), dried over sodium sulfate and concentrated. The deuterated products were then purified by silica gel column chromatography.

## 3 Optimization details

**Table 1** The effect of different catalytic amines.

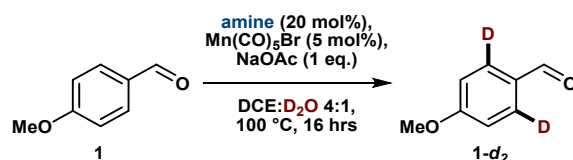

| Entry | Catalytic amine [20 mol%] | Deuterium incorporation [%] |
|-------|---------------------------|-----------------------------|
| 1     | -                         | 0                           |
| 2     | 2-aminobenzotrifluoride   | 0                           |
| 3     | benzylamine               | 66                          |
| 4     | 2-methylbenzylamine       | 65                          |
| 5     | 2,6-dimethylbenzylamine   | 69                          |

|           |                                |           |
|-----------|--------------------------------|-----------|
| 6         | 3-methoxybenzylamine           | 57        |
| 7         | 4-methoxybenzylamine           | 67        |
| 8         | 2-(trifluoromethyl)benzylamine | 67        |
| 9         | 3-(trifluoromethyl)benzylamine | 56        |
| 10        | 4-(trifluoromethyl)benzylamine | 54        |
| 11        | 3,4-difluorobenzylamine        | 52        |
| 12        | 1-phenylethylamine             | 32        |
| <b>13</b> | <b>n-butylamine</b>            | <b>73</b> |
| 14        | n-octylamine                   | 72        |
| 15        | cyclopentylamine               | 48        |
| 16        | 4-phenylbutylamine             | 72        |
| 17        | glycine                        | 0         |

Scale: 0.5 mmol **1**. Deuterium incorporation was determined by  $^1\text{H}$  NMR through the decrease of the doublet at 7.81 ppm while referencing on the protons in *meta* position.

**Table 2** The effect of different catalyst precursors.

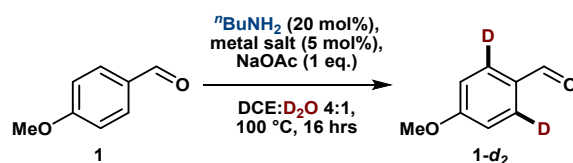

| Entry | Catalyst precursor [5 mol%]       | Deuterium incorporation [%] |
|-------|-----------------------------------|-----------------------------|
| 1     | -                                 | 0                           |
| 2     | $\text{Mn}(\text{CO})_5\text{Br}$ | 73                          |
| 3     | $\text{Mn}_2(\text{CO})_{10}$     | 85                          |
| 4     | $\text{MnCl}_2$                   | 0                           |
| 5     | $\text{Mn}(\text{OAc})_2$         | 0                           |

Scale: 0.5 mmol **1**. Deuterium incorporation was determined by  $^1\text{H}$  NMR through the decrease of the doublet at 7.81 ppm while referencing on the protons in *meta* position.

Since dimanganese decacarbonyl was completely ineffective for the deuteration of 2-nitrobenzaldehyde, the model substrate for acidic deuteration conditions, while manganese pentacarbonyl bromide was an efficient catalyst under these conditions, the latter was used as a catalyst for further experiments to allow for a broader scope of the reaction.

**Table 3** The effect of catalyst loading.

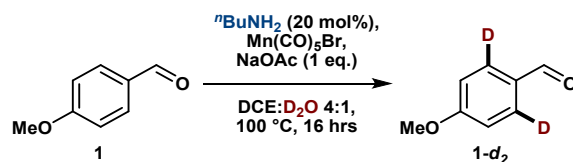

| Entry | Catalyst loading [mol%] | Deuterium incorporation [%] |
|-------|-------------------------|-----------------------------|
| 1     | 0                       | 0                           |
| 2     | 2.5                     | 62                          |
| 3     | 5                       | 73                          |
| 4     | 10                      | 81                          |
| 5     | 20                      | 94                          |

Scale: 0.5 mmol **1**. Deuterium incorporation was determined by  $^1\text{H}$  NMR through the decrease of the doublet at 7.81 ppm while referencing on the protons in *meta* position.

Aiming for a cost-efficient procedure, a catalyst loading of 5 mol% was used for the evaluation of the substrate scope. Indeed, most substrates were sufficiently reactive with this lower catalyst loading.

**Table 4** Effect of solvents.

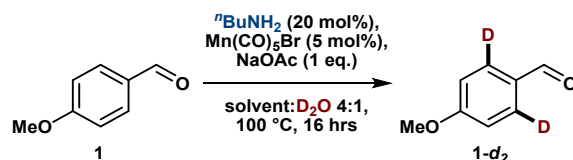

| Entry | Co-solvent       | Deuterium incorporation [%] |
|-------|------------------|-----------------------------|
| 1     | DCE              | 73                          |
| 2     | DME              | 80                          |
| 3     | PhCl             | 54                          |
| 4     | Toluene          | 55                          |
| 5     | D <sub>2</sub> O | 88                          |
| 6     | DMF              | 23                          |
| 7     | 1,4-Dioxane      | 62                          |

Scale: 0.5 mmol **1**. Deuterium incorporation was determined by  $^1\text{H}$  NMR through the decrease of the doublet at 7.81 ppm while referencing on the protons in *meta* position.

**Table 5** Effect of base and acid additives.

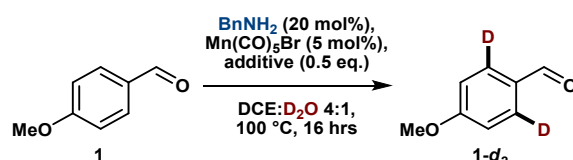

| Entry | Additive (0.5 eq.)                     | Deuterium incorporation [%] |
|-------|----------------------------------------|-----------------------------|
| 1     | NaOAc                                  | 60                          |
| 2     | K <sub>2</sub> CO <sub>3</sub>         | 0                           |
| 3     | Cy <sub>2</sub> NH                     | 9                           |
| 4     | AcOH                                   | 50                          |
| 5     | TFA                                    | 0                           |
| 6     | PivOH                                  | 21                          |
| 7     | AdCO <sub>2</sub> H                    | 22                          |
| 8     | PhCO <sub>2</sub> H                    | 21                          |
| 9     | 4-Cl-PhCO <sub>2</sub> H               | 21                          |
| 10    | 4-OMe-PhCO <sub>2</sub> H              | 29                          |
| 11    | 4-CF <sub>3</sub> -PhCO <sub>2</sub> H | 10                          |

Scale: 0.5 mmol **1**. Deuterium incorporation was determined by  $^1\text{H}$  NMR through the decrease of the doublet at 7.81 ppm while referencing on the protons in *meta* position. AdCO<sub>2</sub>H = adamantane carboxylic acid.

**Table 6** Effect of base loading.

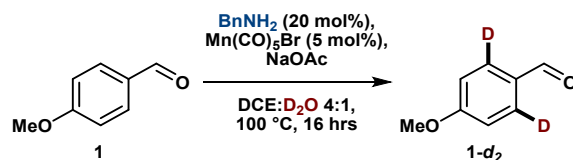

| Entry | NaOAc loading [eq.] | Deuterium incorporation [%] |
|-------|---------------------|-----------------------------|
| 1     | 0.25                | 51                          |
| 2     | 0.5                 | 60                          |
| 3     | 1                   | 66                          |
| 4     | 2                   | 59                          |

## 4 Characterization data for deuterated compounds

***p*-Anisaldehyde-2,6-*d*<sub>2</sub> (1-*d*<sub>2</sub>).** Procedure A, 16 hrs. Purification with pentane:ethyl acetate 9:1. 73% Deuterium incorporation on average in positions 2 and 6, 80% isolated yield (average of two runs). <sup>1</sup>H NMR (300 MHz, CDCl<sub>3</sub>) δ 9.86 (s, 1H), 7.81 (d, *J* = 9.1 Hz, 28% <sup>1</sup>H, 2H), 6.99–6.97 (m, 2H), 3.86 (s, 3H). <sup>13</sup>C NMR (75 MHz, CDCl<sub>3</sub>) δ 190.8, 164.7, 131.7 (t, *J* = 24.7 Hz), 129.9 (t, *J* = 5.5 Hz), 114.3, 55.6. HRMS (EI): *m/z*: calcd. for [M]: 138.0644, found 138.0640. MS (EI, 70 eV): *m/z* (%): 138 (49.2) M-*d*<sub>2</sub>, 137 (100.0) M-*d*<sub>2</sub>-H, 136 (55.9) M-*d*-H, 109 (8.0), 94 (10.6), 79 (16.3).

***p*-Fluorobenzaldehyde-2,6-*d*<sub>2</sub> (2-*d*<sub>2</sub>).** Procedure A, 16 hrs. Purification with pentane:ethyl acetate 20:1 → 10:1. 93% Deuterium incorporation on average in positions 2 and 6, 89% isolated yield. <sup>1</sup>H NMR (300 MHz, CDCl<sub>3</sub>) δ 9.98 (s, 1H), 7.91 (dd, *J* = 9.1, 5.3 Hz, 7% <sup>1</sup>H, 2H), 7.22 (d, *J* = 8.4 Hz, 2H). <sup>13</sup>C NMR (75 MHz, CDCl<sub>3</sub>) δ 190.6, 166.6 (d, *J* = 255.7 Hz), 133.0 (m), 132.4–131.6 (m), 116.4 (d, *J* = 22.3 Hz). MS (EI, 70 eV): *m/z* (%): 126 (79.9) M-*d*<sub>2</sub>, 125 (100.0) M-*d*<sub>2</sub>-H, 124 (16.6) M-*d*-H, 97 (70.7).

***p*-Chlorobenzaldehyde-2,6-*d*<sub>2</sub> (3-*d*<sub>2</sub>).** Procedure A, 16 hrs. Purification with pentane:ethyl acetate 10:1. 91% Deuterium incorporation on average in positions 2 and 6, 48% isolated yield. <sup>1</sup>H NMR (300 MHz, CDCl<sub>3</sub>) δ 9.98 (s, 1H), 7.84–7.81 (d, *J* = 8.8 Hz, 19% <sup>1</sup>H, 2H), 7.53–7.51 (m, 2H). <sup>13</sup>C NMR (75 MHz, CDCl<sub>3</sub>) δ 191.0, 141.1, 134.7, 130.7 (t, *J* = 24.5 Hz), 129.5. HRMS (EI): *m/z*: calcd. for [M-H]: 141.0071, found 141.0074. MS (EI, 70 eV): *m/z* (%): 144 (21.1) M(<sup>37</sup>Cl)-*d*<sub>2</sub>, 143 (36.9) M(<sup>37</sup>Cl)-*d*<sub>2</sub>-H, 142 (69.1) M(<sup>35</sup>Cl)-*d*<sub>2</sub>, 141 (100.0) M(<sup>35</sup>Cl)-*d*<sub>2</sub>-H, 140 (17.9) M(<sup>35</sup>Cl)-*d*-H, 115 (14.9), 113 (45.2).

***o*-Chlorobenzaldehyde-6-*d* (4-*d*).** Procedure B, 2.5 mol% Mn(CO)<sub>5</sub>Br, 19 hrs. Purification with pentane:ethyl acetate 10:1. 88 % Deuterium incorporation in position 6, 32 % isolated yield. <sup>1</sup>H NMR (400 MHz, CDCl<sub>3</sub>) δ 10.49 (s, 1H), 7.92 (ddd, *J* = 7.7, 1.8, 0.4 Hz, 12% <sup>1</sup>H, 1H), 7.53 (dd, *J* = 8.0, 7.1 Hz, 1H), 7.45 (d, *J* = 8.1, 1.4 Hz, 1H), 7.42–7.35 (m, 1H). HRMS (EI): *m/z*: calcd. For [M-H]: 140.0008, found 140.0005. MS (EI, 70 eV): *m/z* (%): 142 (38.6) [M-H](<sup>37</sup>Cl)-*d*, 141 (72.9) [M-H](<sup>37</sup>Cl), 140 (100.0) [M-H](<sup>35</sup>Cl)-*d*, 139 (14.5) [M-H](<sup>35</sup>Cl), 112 (36.9).

***m*-Bromobenzaldehyde-2,6-*d*<sub>2</sub> (5-*d*<sub>2</sub>).** Procedure A, 72 hrs. Purification with pentane:ethyl acetate 20:1. 70% Deuterium incorporation in positions 2 and 6, 79% isolated yield. <sup>1</sup>H NMR (300 MHz, CDCl<sub>3</sub>) δ 9.95 (m, 1H), 8.00–7.99 (m, 30% <sup>1</sup>H, 1H), 7.82–7.78 (m, 30% <sup>1</sup>H, 1H), 7.76–7.72 (m, 1H), 7.44–7.39 (m, 1H). <sup>13</sup>C NMR (75 MHz, CDCl<sub>3</sub>) δ 190.9, 138.1, 137.4, 132.5, 130.7, 128.5, 123.4. HRMS (EI): *m/z*: calcd. for [M-H]: 186.9545, found 186.9545. MS (EI, 70 eV): *m/z* (%): 187 (96.5) M(<sup>81</sup>Br)-*d*<sub>2</sub>, 186 (99.9) M(<sup>81</sup>Br)-*d*, 185 (100.0) M(<sup>79</sup>Br)-*d*<sub>2</sub>, 184 (53.9) M(<sup>79</sup>Br)-*d*, 159 (27.1), 158 (26.6), 157 (29.3), 156 (23.9), 78 (30.0), 77 (23.8), 51 (23.2).

**4-Bromo-2-fluorobenzaldehyde-6-*d* (6-*d*).** Procedure A, 16 hrs. Purification with pentane:ethyl acetate 20:1. 96% Deuterium incorporation in position 6, 78% isolated yield. <sup>1</sup>H NMR (300 MHz, CDCl<sub>3</sub>) δ 10.30 (d, *J* = 0.6 Hz, 1H), 7.76–7.71 (m, 4% <sup>1</sup>H, 1H), 7.42–7.42 (m, 1H), 7.38 (dd, *J* = 9.7, 1.7 Hz, 1H). <sup>13</sup>C NMR (75 MHz, CDCl<sub>3</sub>) δ 186.2 (d, *J* = 6.3 Hz), 164.2 (d, *J* = 263.1 Hz), 130.3 (d, *J* = 10.0 Hz), 129.8–129.1 (m), 128.4 (d, *J* = 3.7 Hz), 123.2 (d, *J* = 8.3 Hz), 120.4 (d, *J* = 23.6 Hz). HRMS (EI): *m/z*: calcd. for [M-H]: 201.9409, found 201.9411. MS (EI, 70 eV): *m/z* (%): 205 (57.6) M(<sup>81</sup>Br)-*d*, 204 (100.0) M(<sup>81</sup>Br)-*d*-H, 203 (62.0) M(<sup>79</sup>Br)-*d*, 202 (97.9) M(<sup>79</sup>Br)-*d*-H, 176 (19.9), 174 (20.6), 95 (29.7).

**5-Chloro-2-fluorobenzaldehyde-6-d (7-d).** Procedure A, 16 hrs. 90% Deuterium incorporation in position 6. Purification on silica gel was unsuccessful.  $^1\text{H NMR}$  (300 MHz,  $\text{CDCl}_3$ )  $\delta$  10.29 (s, 1H), 7.81 (dd,  $J = 5.9, 2.8$  Hz, 10%  $^1\text{H}$ , 1H), 7.54 (dd,  $J = 8.8, 4.5$  Hz, 1H), 7.14 (dd,  $J = 9.2$  Hz, 1H). **HRMS** (EI):  $m/z$ : calcd. for [M-H] ( $^{37}\text{Cl}$ ): 159.9884, found 159.9888. **MS** (EI, 70 eV):  $m/z$  (%): 161 (20.5) [M] $^{(37}\text{Cl})$ -d, 160 (36.5) [M-H] $^{(37}\text{Cl})$ -d, 159 (69.3) [M] $^{(35}\text{Cl})$ -d, 158 (100.0) [M-H] $^{(35}\text{Cl})$ -d, 157 (22.4) [M-H] $^{(35}\text{Cl})$ , 130 (36.8), 110 (8.4), 95 (29.2), 75 (31.0).

**p-(Trifluoromethyl)benzaldehyde-2,6-d<sub>2</sub> (8-d<sub>2</sub>).** Procedure A, 16 hrs. Purification with pentane:ethyl acetate 10:1. 76% Deuterium incorporation on average in positions 2 and 6, 30% isolated yield.  $^1\text{H NMR}$  (300 MHz,  $\text{CDCl}_3$ )  $\delta$  10.10 (s, 1H), 8.00 (dq,  $J = 8.5, 0.7$  Hz, 34%  $^1\text{H}$ , 2H), 7.82–7.79 (m, 2H).  $^{13}\text{C NMR}$  (75 MHz,  $\text{CDCl}_3$ )  $\delta$  191.2, 138.8, 136.1, 130.0, 126.2, 121.8. **HRMS** (EI):  $m/z$ : calcd. For [M-H]: 175.0334, found 175.0335. **MS** (EI, 70 eV):  $m/z$  (%): 176 (56.2) M-d<sub>2</sub>, 175 (100.0) M-H-d<sub>2</sub>/M-d, 174 (44.4) M-H-d, 147 (73.2), 146 (44.1).

**1-Naphthaldehyde-2-d (9-d).** Procedure A, 16 hrs. Purification with pentane:ethyl acetate 10:1. 81% Deuterium incorporation in position 2, 85% isolated yield.  $^1\text{H NMR}$  (300 MHz,  $\text{CDCl}_3$ )  $\delta$  10.41 (s, 1H), 9.28–9.24 (m, 1H), 8.10 (d,  $J = 8.2$  Hz, 1H), 7.99 (dd,  $J = 7.1, 1.3$  Hz, 19%  $^1\text{H}$ , 1H), 7.94–7.91 (m, 1H), 7.70 (ddd,  $J = 8.5, 6.9, 1.5$  Hz, 1H), 7.66–7.57 (m, 2H).  $^{13}\text{C NMR}$  (75 MHz,  $\text{CDCl}_3$ )  $\delta$  193.6, 136.4 (t,  $J = 24.4$  Hz), 135.4, 133.8, 131.5, 130.6, 129.2, 128.6, 127.1, 125.0. **HRMS** (EI):  $m/z$ : calcd. For [M]: 157.0632, found 157.0630.

**Benzaldehyde-2,6-d<sub>2</sub> (10-d<sub>2</sub>).** Procedure A, 16 hrs. Purification with pentane:ethyl acetate 9:1. 50% Deuterium incorporation on average in positions 2 and 6, 79% isolated yield.  $^1\text{H NMR}$  (300 MHz,  $\text{CDCl}_3$ )  $\delta$  10.02 (s, 1H), 7.90–7.86 (m, 50%  $^1\text{H}$ , 2H), 7.66–7.60 (m, 1H), 7.56–7.50 (m, 2H).  $^{13}\text{C NMR}$  (75 MHz,  $\text{CDCl}_3$ )  $\delta$  192.5, 136.5, 134.6, 129.9, 129.0.

**o-Tolualdehyde-6-d (11-d).** Procedure A, 72 hrs. Purification with pentane:ethyl acetate 20:1. 61% Deuterium incorporation in position 6, 61% isolated yield.  $^1\text{H NMR}$  (400 MHz,  $\text{CDCl}_3$ )  $\delta$  10.28 (s, 1H), 7.80 (dd,  $J = 7.6, 1.5$  Hz, 5%  $^1\text{H}$ , 1H), 7.51–7.46 (m, 1H), 7.39–7.35 (m, 1H), 7.28–7.25 (m, 1H).  $^{13}\text{C NMR}$  (75 MHz,  $\text{CDCl}_3$ )  $\delta$  193.0, 140.8, 134.3, 133.8, 132.2, 131.9, 126.4, 19.7. **HRMS** (EI):  $m/z$ : calcd. for [M-H]: 120.0554, found 120.0553. **MS** (EI, 70 eV):  $m/z$  (%): 121 (71.7) M-d, 120 (100.0) M-H-d, 119 (35.0) M-H, 92 (79.8), 65 (15.6), 51 (7.2), 39 (9.2).

**Biphenyl-4-carboxaldehyde-3,5-d<sub>2</sub> (12-d<sub>2</sub>).** Procedure A, 72 hrs. Purification with pentane:ethyl acetate 10:1. 44% Deuterium incorporation on average in positions 3 and 5, 83% isolated yield.  $^1\text{H NMR}$  (300 MHz,  $\text{CDCl}_3$ )  $\delta$  10.06 (s, 1H), 7.97–7.93 (m, 57%  $^1\text{H}$ , 2H), 7.77–7.73 (m, 2H), 7.66–7.62 (m, 2H), 7.52–7.39 (m, 3H).  $^{13}\text{C NMR}$  (75 MHz,  $\text{CDCl}_3$ )  $\delta$  191.9, 147.2, 139.8, 130.3, 129.1, 128.6, 127.7, 127.6, 127.4. **HRMS** (EI):  $m/z$ : calcd. for [M-H]: 183.0774, found 183.0780. **MS** (EI, 70 eV):  $m/z$  (%): 184 (22.7) M-d<sub>2</sub>, 183 (76.7) M-d<sub>2</sub>-H, 182 (100.0) M-d-H, 181 (44.9) M-H, 154 (34.3), 153 (54.8), 152 (42.5).

**p-tert-Butylbenzaldehyde-2,6-d<sub>2</sub> (13-d<sub>2</sub>).** Procedure A, 72 hrs. Purification with pentane:ethyl acetate 20:1. 18% Deuterium incorporation on average in positions 2 and 6, 77% isolated yield.  $^1\text{H NMR}$  (300 MHz,  $\text{CDCl}_3$ )  $\delta$  9.98 (s, 1H), 7.81 (d,  $J = 8.6$  Hz, 83%  $^1\text{H}$ , 2H), 7.55 (d,  $J = 8.2$  Hz, 2H), 1.35 (s, 9H).  $^{13}\text{C NMR}$  (75 MHz,  $\text{CDCl}_3$ )  $\delta$  192.1, 158.6, 134.2, 129.8, 126.1, 35.5, 31.2. **HRMS** (EI):  $m/z$ : calcd. for [M-H] (monodeuterated compound): 162.1024, found 162.1029. **MS** (EI, 70 eV):  $m/z$  (%): 163 (14.2) M-d, 162 (23.8) M-d-H, 148 (58.7), 147 (100.0), 120 (12.6), 119 (24.2), 92 (19.4), 91 (42.7).

**3,4-Dimethoxybenzaldehyde-2,6-d<sub>2</sub> (14-d<sub>2</sub>).** Procedure A, 16 hrs. Purification with pentane:ethyl acetate 4:1 → 2:1. 79% Deuterium incorporation in position 2, 62% deuterium incorporation in position 6, 77% isolated yield.  $^1\text{H NMR}$  (300 MHz,  $\text{CDCl}_3$ )  $\delta$  9.81 (s, 1H), 7.41 (d,  $J = 8.2$  Hz, 38%  $^1\text{H}$ , 1H), 7.36 (br s, 21%  $^1\text{H}$ , 1H), 6.95–6.92 (m, 1H), 3.92 (s, 3H), 3.89 (s, 3H).  $^{13}\text{C NMR}$  (75 MHz,  $\text{CDCl}_3$ )  $\delta$  190.9, 154.5, 149.6, 130.0, 126.8, 110.3, 108.9, 56.2, 56.0. **MS** (EI, 70 eV):  $m/z$  (%): 168 (62.8) M-d<sub>2</sub>, 167 (100.0) M-d, 166 (55.9) M-d-H, 165 (10.1) M-H, 96 (17.6).

**p-Dimethylaminobenzaldehyde-2,6-d<sub>2</sub> (15-d<sub>2</sub>).** Procedure A, 72 hrs. Purification with pentane:ethyl acetate 4:1. 51% Deuterium incorporation on average in positions 2 and 6, 100% isolated yield.  $^1\text{H NMR}$  (300 MHz,  $\text{CDCl}_3$ )  $\delta$  10.29 (br s, 1H), 8.28 (d,  $J = 9.2$  Hz, 49%  $^1\text{H}$ , 2H), 7.27–7.23 (m, 2H), 3.63 (s, 6H).  $^{13}\text{C NMR}$  (75 MHz,  $\text{CDCl}_3$ )  $\delta$  190.3, 154.4, 132.0, 125.1, 111.0, 40.1. **HRMS** (EI):  $m/z$ : calcd. For [M]: 151.0961, found 151.0959. **MS** (EI, 70 eV):  $m/z$  (%): 151 (33.1) M-d<sub>2</sub>, 150 (94.3) M-d, 149 (100.0) M, 148 (32.8).

**Piperonal-2,6-d<sub>2</sub> (16-d<sub>2</sub>).** Procedure A, 16 hrs. Purification with pentane:ethyl acetate 4:1. 95% Deuterium incorporation in position 2, 39% deuterium incorporation in position 6, 78% isolated yield.  $^1\text{H NMR}$  (300 MHz,

**CDCl<sub>3</sub>**)  $\delta$  9.78 (s, 1H), 7.38 (d,  $J = 8.0$  Hz, 61% <sup>1</sup>H, 1H), 7.30 (m, 5% <sup>1</sup>H, 1H), 6.92–6.89 (m, 1H), 6.05 (s, 2H). **<sup>13</sup>C NMR (75 MHz, CDCl<sub>3</sub>)**  $\delta$  190.3, 153.2, 148.7, 131.9, 128.7, 108.4, 106.7 (t,  $J = 26.3$  Hz), 102.2. **HRMS (EI):**  $m/z$ : calcd. for [M]: 152.0437, found 152.0434. **MS (EI, 70 eV):**  $m/z$  (%): 152 (38.2) M-*d*<sub>2</sub>, 151 (100.0) M-*d*, 150 (74.3) M, 123 (12.0), 122 (19.0).

**6-Bromopiperonal-*d* (17-*d*)**. Procedure B, 2.5 mol% Mn(CO)<sub>5</sub>Br, 17 hrs. Purification with pentane:ethyl acetate 9:1. 77% Deuterium incorporation, 85% isolated yield. **<sup>1</sup>H NMR (300 MHz, CDCl<sub>3</sub>)**  $\delta$  10.15 (s, 1H), 7.34 (s, 5% <sup>1</sup>H, 1H), 7.03 (s, 1H), 6.07 (s, 2H). **<sup>13</sup>C NMR (75 MHz, CDCl<sub>3</sub>)**  $\delta$  190.4, 160.6, 153.5, 148.2, 128.1, 121.7, 113.4, 102.9. **HRMS (EI):**  $m/z$ : calcd. For [M]: 228.9479, found 228.9484. **MS (EI, 70 eV):**  $m/z$  (%): 231 (82.5) M(<sup>81</sup>Br)-*d*, 230 (100.0) M(<sup>81</sup>Br)-H-*d*, 229 (88.1) M(<sup>79</sup>Br)-*d*, 228 (95.7) M(<sup>79</sup>Br)-H-*d*, 202 (19.7), 200 (22.8), 144 (10.4), 121 (9.5), 91 (6.1), 64 (23.2), 63 (28.8).

***p*-Formylacetanilide-3,5-*d*<sub>2</sub> (18-*d*<sub>2</sub>)**. Procedure A, 72 hrs. Purification with pentane:ethyl acetate 1:1. 75% Deuterium incorporation on average in positions 3 and 5, 96% isolated yield. **<sup>1</sup>H NMR (300 MHz, CDCl<sub>3</sub>)**  $\delta$  9.92 (br s), 7.85 (d,  $J = 9.0$  Hz, 25% <sup>1</sup>H, 2H), 7.71–7.69 (m, 3H), 2.23 (s, 3H). **<sup>13</sup>C NMR (75 MHz, CDCl<sub>3</sub>)**  $\delta$  191.3, 168.9, 143.7, 132.2, 131.3, 119.3, 24.9. **HRMS (EI):**  $m/z$ : calcd. for [M]: 165.0753, found 165.0756. **MS (EI, 70 eV):**  $m/z$  (%): 165 (27.0) M-*d*<sub>2</sub>, 164 (20.4) M-*d*, 123 (43.2), 122 (100.0), 121 (62.3), 94 (10.7), 66 (10.6), 43 (26.6).

***p*-Cyanobenzaldehyde-2,6-*d*<sub>2</sub> (19-*d*<sub>2</sub>)**. Procedure B, 16 hrs. Purification with pentane:ethyl acetate 10:1 → 9:1. 88% Deuterium incorporation on average in positions 2 and 6, 100% isolated yield. **<sup>1</sup>H NMR (400 MHz, CDCl<sub>3</sub>)**  $\delta$  10.09 (s, 1H), 7.99 (d,  $J = 8.3$  Hz, 12% <sup>1</sup>H, 2H), 7.85–7.83 (m, 2H). **<sup>13</sup>C NMR (75 MHz, CDCl<sub>3</sub>)**  $\delta$  190.7, 138.7, 132.9, 129.7 (t,  $J = 25.3$  Hz), 117.8, 117.7. **HRMS (EI):**  $m/z$ : calcd. For [M-H]: 132.0413, found 131.0412. **MS (EI, 70 eV):**  $m/z$  (%): 133 (59.5) M-*d*<sub>2</sub>, 132 (100.0) M-H-*d*<sub>2</sub>, 131 (22.5) M-H-*d*, 104 (47.4), 77 (16.9), 51 (9.4).

***m*-Cyanobenzaldehyde-2,6-*d*<sub>2</sub> (20-*d*<sub>2</sub>)**. Procedure B, 2.5 mol% Mn(CO)<sub>5</sub>Br, 8 hrs. Purification with pentane:ethyl acetate 9:1. 89% Deuterium incorporation in position 2, 78% deuterium incorporation in position 6, 90 % isolated yield. **<sup>1</sup>H NMR (300 MHz, CDCl<sub>3</sub>)**  $\delta$  10.05 (s, 1H), 8.17–8.10 (m, 35% <sup>1</sup>H, 2H), 7.91 (d,  $J = 7.7$  Hz, 1H), 7.72–7.67 (m, 1H). **<sup>13</sup>C NMR (75 MHz, CDCl<sub>3</sub>)**  $\delta$  190.0, 137.3, 136.8, 133.4, 133.2, 130.1, 117.6, 113.7. **HRMS (EI):**  $m/z$ : calcd. for [M-H]: 132.0413, found 132.0413. **MS (EI, 70 eV):**  $m/z$  (%): 133 (55.8) M-*d*<sub>2</sub>, 132 (100.0) M-H-*d*<sub>2</sub>, 131 (36.1) M-H-*d*, 104 (41.9), 77 (17.6), 51 (9.8).

***p*-Nitrobenzaldehyde-2,6-*d*<sub>2</sub> (21-*d*<sub>2</sub>)**. Procedure B, 16 hrs. Purification with pentane:ethyl acetate 9:1. 91% Deuterium incorporation on average in positions 2 and 6, 81% isolated yield. **<sup>1</sup>H NMR (300 MHz, CDCl<sub>3</sub>)**  $\delta$  10.16 (s, 1H), 8.42–8.38 (m, 2H), 8.08 (d,  $J = 9.0$  Hz, 9% <sup>1</sup>H, 2H). **<sup>13</sup>C NMR (75 MHz, CDCl<sub>3</sub>)**  $\delta$  190.4, 151.2, 140.0, 130.3 (t,  $J = 25.5$  Hz), 124.3. **HRMS (EI):**  $m/z$ : calcd. For [M]: 153.0390, found 131.0387. **MS (EI, 70 eV):**  $m/z$  (%): 153 (88.9) M-*d*<sub>2</sub>, 152 (100.0) M-H-*d*<sub>2</sub>, 151 (21.8) M-H-*d*, 137 (2.7), 122 (4.4), 107 (18.0), 106 (18.6), 94 (9.3), 79 (49.7), 67 (7.8), 52 (28.7).

***m*-Nitrobenzaldehyde-2,6-*d*<sub>2</sub> (22-*d*<sub>2</sub>)**. Procedure B, 2.5 mol% Mn(CO)<sub>5</sub>Br, 19 hrs. Purification with pentane:ethyl acetate 10:1 → 9:1. 50% Deuterium incorporation in position 2, 90% deuterium incorporation in position 6, 100 % isolated yield. **<sup>1</sup>H NMR (300 MHz, CDCl<sub>3</sub>)**  $\delta$  10.11 (s, 1H), 8.69 (dd,  $J = 2.3, 0.4$  Hz, 50% <sup>1</sup>H, 1H), 8.49–8.46 (m, 1H), 8.26–8.21 (m, 10% <sup>1</sup>H, 1H), 7.79–7.74 (m, 1H). **<sup>13</sup>C NMR (75 MHz, CDCl<sub>3</sub>)**  $\delta$  189.8, 148.9, 137.3, 134.5 (t,  $J = 25.4$  Hz), 130.4, 128.7, 124.5. **HRMS (EI):**  $m/z$ : calcd. For [M-H]: 152.0327, found 152.0324. **MS (EI, 70 eV):**  $m/z$  (%): 153 (45.7) M-*d*<sub>2</sub>, 152 (100.0) M-H-*d*<sub>2</sub>, 151 (59.1) M-H-*d*, 106 (29.7), 78 (47.1), 52 (27.4).

***o*-Nitrobenzaldehyde-6-*d* (23-*d*)**. Procedure B, 2.5 mol% Mn(CO)<sub>5</sub>Br, 8 hrs. Purification with pentane:ethyl acetate 9:1. 95 % Deuterium incorporation in position 6, 77 % isolated yield. **<sup>1</sup>H NMR (400 MHz, CDCl<sub>3</sub>)**  $\delta$  10.41 (d,  $J = 0.7$  Hz, 1H), 8.11 (dd,  $J = 7.7, 1.6$  Hz, 1H), 7.96–7.93 (m, 5% <sup>1</sup>H, 1H), 7.81–7.74 (m, 2H). **<sup>13</sup>C NMR (75 MHz, CDCl<sub>3</sub>)**  $\delta$  188.3, 149.7, 134.1, 133.8, 131.4, 129.8, 129.5 (t,  $J = 20.6$  Hz), 124.6.

**Indole-3-carboxaldehyde-2-*d* (24-*d*)**. Procedure B, 16 hrs. Purification with DCM:acetone 20:1. 84% Deuterium incorporation in position 2, 82% isolated yield. **<sup>1</sup>H NMR (300 MHz, CD<sub>3</sub>OD)**  $\delta$  9.88 (s, 1H), 8.17–8.14 (m, 1H), 8.09 (s, 16% <sup>1</sup>H, 1H), 7.49–7.46 (m, 1H), 7.30–7.21 (m, 2H). **<sup>13</sup>C NMR (75 MHz, CD<sub>3</sub>OD)**  $\delta$  187.4, 139.3 (t,  $J = 28.9$  Hz), 138.9, 125.7, 125.0, 123.6, 122.4, 120.0, 133.1. **HRMS (ESI-TOF):**  $m/z$ : calcd. For [M+H]<sup>+</sup>: 147.0668, found 147.0673.



**Indole-6-carboxaldehyde-3,7-*d*<sub>2</sub> (25-*d*<sub>2</sub>).** Procedure A, 16 hrs. Purification with pentane:ethyl acetate 2:1. 91% Deuterium incorporation in position 3, 10% deuterium incorporation in position 5, 92% deuterium incorporation in position 7, 89% isolated yield. **<sup>1</sup>H NMR (300 MHz, CDCl<sub>3</sub>)** δ 10.45 (br s, 5% <sup>1</sup>H, 1H), 9.87 (s, 1H), 7.85 (s, 8% <sup>1</sup>H, 1H), 7.61 (d, *J* = 8.2 Hz, 1H), 7.50 (d, *J* = 8.2 Hz, 90% <sup>1</sup>H, 1H), 7.37 (s, 1H), 6.49 (d, *J* = 2.9 Hz, 9% <sup>1</sup>H, 1H). **<sup>13</sup>C NMR (75 MHz, CDCl<sub>3</sub>)** δ 193.6, 135.4, 133.3, 130.2, 129.5, 120.7, 120.3, 114.8, 102.5. **HRMS (EI):** *m/z*: calcd. for [M]: 147.0648, found 147.0646. **MS (EI, 70 eV):** *m/z* (%): 148 (37.6) M-*d*<sub>3</sub>, 147 (100.0) M-*d*<sub>2</sub>, 146 (77.3) M-*d*, 145 (13.4) M, 119 (26.8), 118 (53.5), 91 (23.4).

**Thiophene-3-carboxaldehyde-*d*<sub>2</sub> (26-*d*<sub>2</sub>).** Procedure B, 2.5 mol% Mn(CO)<sub>5</sub>Br, 17 hrs. Purification with pentane:ethyl acetate 20:1 → 10:1. 94% Deuterium incorporation in position 2, 39% deuterium incorporation in position 4, 66% isolated yield. **<sup>1</sup>H NMR (300 MHz, CDCl<sub>3</sub>)** δ 9.92 (s, 1H), 9.12 (dd, *J* = 2.9, 1.1 Hz, 6% <sup>1</sup>H, 1H), 7.53 (d, *J* = 5.1 Hz, 61% <sup>1</sup>H, 1H), 7.37–7.35 (m, 1H). **<sup>13</sup>C NMR (75 MHz, CDCl<sub>3</sub>)** δ 185.0, 143.0, 136.6 (t, *J* = 28.0 Hz), 127.3, 125.5.

**Benzothiophene-3-carboxaldehyde-2-*d* (27-*d*).** Procedure A, 16 hrs. Purification with pentane:ethyl acetate 10:1. 96% Deuterium incorporation in position 2, 100% isolated yield. **<sup>1</sup>H NMR (300 MHz, CDCl<sub>3</sub>)** δ 10.13 (s, 1H), 8.68 (ddd, *J* = 8.0, 1.6, 0.7 Hz, 1H), 8.29 (s, 4% <sup>1</sup>H, 1H), 7.87 (ddd, *J* = 7.7, 1.4, 0.7 Hz, 1H), 7.54–7.42 (m, 2H). **<sup>13</sup>C NMR (75 MHz, CDCl<sub>3</sub>)** δ 185.5, 143.1 (t, *J* = 27.9 Hz), 140.5, 136.4, 135.2, 126.2, 126.2, 124.9, 122.5. **HRMS (EI):** *m/z*: calcd. for [M]: 163.0181, found 163.0186. **MS (EI, 70 eV):** *m/z* (%): 163 (89.4) M-*d*, 162 (100.0) M, 134 (23.3), 90 (31.3).

**3-Formyl-6-methyl-chromone-*d*<sub>2</sub> (28-*d*<sub>2</sub>).** Procedure A, 10 mol% Mn(CO)<sub>5</sub>Br, 16 hrs. Purification with pentane:ethyl acetate 4:1. 72% Deuterium incorporation in position 2, 68% formyl D, 48% isolated yield. **<sup>1</sup>H NMR (300 MHz, CDCl<sub>3</sub>)** δ 10.38 (s, 32% <sup>1</sup>H, 1H), 8.52 (m, 28% <sup>1</sup>H, 1H), 8.07 (m, 1H), 7.57–7.53 (m, 1H), 7.43 (d, *J* = 8.6 Hz, 1H), 2.48 (s, 3H). **<sup>13</sup>C NMR (75 MHz, CDCl<sub>3</sub>)** δ 188.9, 176.2, 160.7, 154.6, 137.1, 136.1, 125.7, 125.1, 120.2, 118.5, 21.1. **HRMS (EI):** *m/z*: calcd. For [M]: 189.0531, found 189.0531.

**Cinnamaldehyde-2-*d* (29-*d*).** Procedure A, 16 hrs. Purification with pentane:ethyl acetate 20:1 → 10:1. 60% Deuterium incorporation in position 2, 100% isolated yield. **<sup>1</sup>H NMR (300 MHz, CDCl<sub>3</sub>)** δ 9.72–9.70 (m, 1H), 7.59–7.54 (m, 2H), 7.51–7.41 (m, 4H), 6.72 (dd, *J* = 16.0, 7.7 Hz, 40% <sup>1</sup>H, 1H). **HRMS (EI):** *m/z*: calcd. For [M]: 133.0632, found 133.0634. **MS (EI, 70 eV):** *m/z* (%): 133 (46.6) M-*d*, 132 (100.0) M, 131 (48.5), 105 (20.0), 104 (45.1), 103 (30.9), 78 (40.1), 77 (28.8), 51 (20.1).

**Acetocinnamone-3-*d* (30-*d*).** Procedure A, 16 hrs. Purification with pentane:ethyl acetate 9:1. 64% Deuterium incorporation in the olefinic α position, 90% deuterium incorporation in the α-carbonyl position, 84% isolated yield. **<sup>1</sup>H NMR (300 MHz, CDCl<sub>3</sub>)** δ 7.55–7.47 (m, 3H), 7.40–7.36 (m, 3H), 6.70 (d, *J* = 16.3 Hz, 36% <sup>1</sup>H, 1H), 2.36–2.32 (m, 10% <sup>1</sup>H, 3H). **<sup>13</sup>C NMR (75 MHz, CDCl<sub>3</sub>)** δ 198.6, 143.5, 134.5, 130.6, 129.0, 128.3, 127.3. **HRMS (EI):** *m/z*: calcd. For [M+H]: 148.0867, found 148.0866. **MS (EI, 70 eV):** *m/z* (%): 150 (53.9) M-*d*<sub>3</sub>, 149 (94.1) M-*d*<sub>2</sub>, 148 (48.6) M-*d*, 132 (100.0), 131 (50.6), 104 (90.1), 103 (56.0), 78 (26.1), 77 (40.2), 51 (23.1).

**Citral-3,4,6-*d*<sub>6</sub> (31-*d*).** Procedure A, 16 hrs. Purification with pentane:ethyl acetate 20:1. 89% Deuterium incorporation in the olefinic α position, 97% deuterium incorporation in the allylic methyl group, 65% deuterium incorporation in the allylic methylene group, 41% isolated yield. **<sup>1</sup>H NMR (300 MHz, CDCl<sub>3</sub>)** δ 9.99–9.87 (m, 1H), 5.88–5.85 (m, 11% <sup>1</sup>H, 1H), 5.12–5.02 (m, 1H), 2.60–2.51 (m, 3% <sup>1</sup>H, 3H), 2.22–2.16 (35% <sup>1</sup>H, 6H), 1.67 (m, 3H), 1.60–1.58 (m, 3H). **<sup>13</sup>C NMR (75 MHz, CDCl<sub>3</sub>)** δ 191.5, 190.9, 163.8, 133.8, 133.0, 127.7, 122.7, 122.4, 41.7, 32.1, 27.0, 25.8, 25.7, 17.8. The ratio of *E/Z* isomers was conserved during the reaction. **HRMS (EI):** *m/z*: calcd. For [M-H]: 157.1494, found 157.1477.

## 5 Unsuccessful substrates

Free hydroxy groups in the benzaldehyde moiety, terminal alkynes, heterocycles with the aldehyde moiety α to the heteroatom and pyridine were not tolerated and either led to recovery of undeuterated starting material (**Figure 1**) or, in some cases, to decomposition (**Figure 2**). Further, the methodology could not be extended to ketones (**Figure 1**).

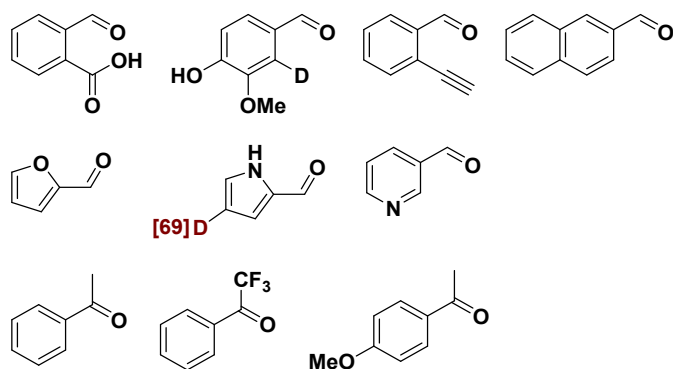

**Figure 1** List of substrates that were not deuterated under the reaction conditions.

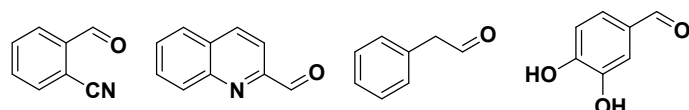

**Figure 2** List of substrates that decomposed under the reaction conditions.

Some other substrates only afforded low deuteration levels and are listed in **Figure 3**.

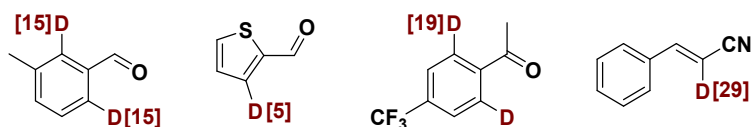

**Figure 3** List of poorly reactive substrates.

## 6 Functional group tolerance

The functional group tolerance of the reaction was evaluated using General Procedure A with piperonal as the substrate and equimolar additives (**Table 7**).

**Table 7** Test of functional group tolerance.

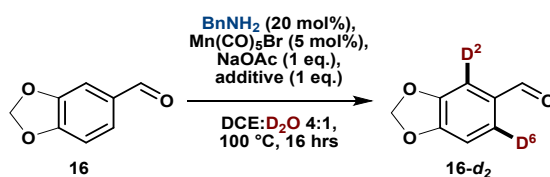

| Entry | additive                             | D <sup>2</sup> [%] | D <sup>6</sup> [%] |
|-------|--------------------------------------|--------------------|--------------------|
| 1     | none                                 | 95                 | 39                 |
| 2     | 4-(trifluoromethyl)styrene           | 90                 | 40                 |
| 3     | acetophenone                         | 93                 | 26                 |
| 4     | phenylboronic acid                   | 91                 | 68                 |
| 5     | phenol                               | 93                 | 43                 |
| 6     | phenylsulfonamide                    | 91                 | 7                  |
| 7     | <i>N</i> -methylbenzamide            | 94                 | 35                 |
| 8     | propyl benzoate                      | 93                 | 35                 |
| 9     | phenyl acetate                       | 59                 | 6                  |
| 10    | pyridine                             | 26                 | 0                  |
| 11    | 1-ethynyl-4-(trifluoromethyl)benzene | 9                  | 0                  |

## 7 Competition experiments with other directing groups

Following General Procedure A and using benzaldehyde as the substrate, equimolar amounts of substrates containing other potential directing groups were added to the reaction mixture in order to compare them in intermolecular competition experiments (**Table 8**).

**Table 8** Intermolecular competition experiments with other directing groups.

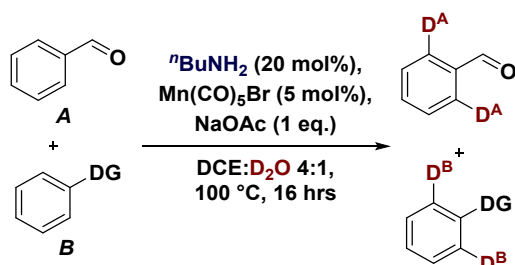

| Entry | DG                    | D <sup>A</sup> [%] | D <sup>B</sup> [%] |
|-------|-----------------------|--------------------|--------------------|
| 1     | none                  | 50                 | -                  |
| 2     | 2-pyridine            | 45                 | 91                 |
| 3     | 1-pyrazole            | 35                 | 39                 |
| 4     | 2-imidazole           | 27                 | 55                 |
| 5     | <i>N</i> -methylamide | 46                 | 0                  |
| 6     | propyl ester          | 46                 | 0                  |
| 7     | acetate               | 14                 | 0                  |

## 8 NMR spectra

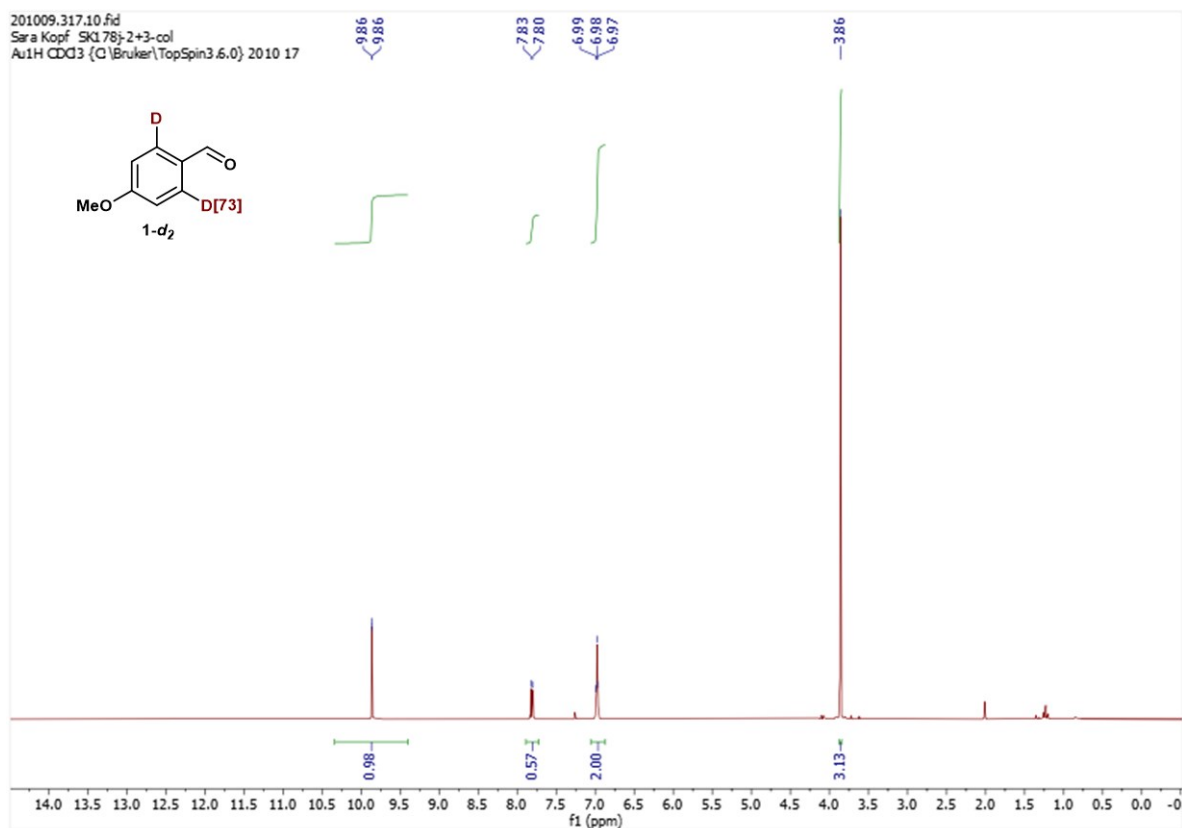

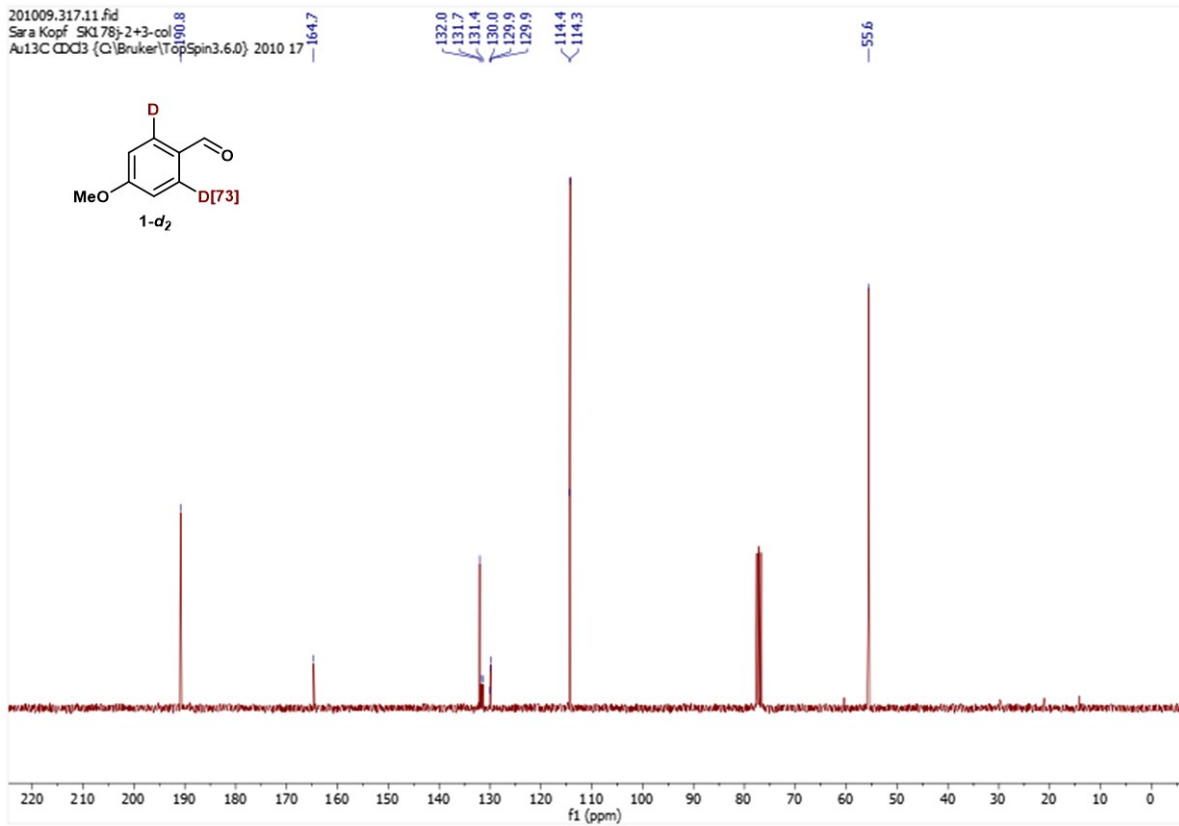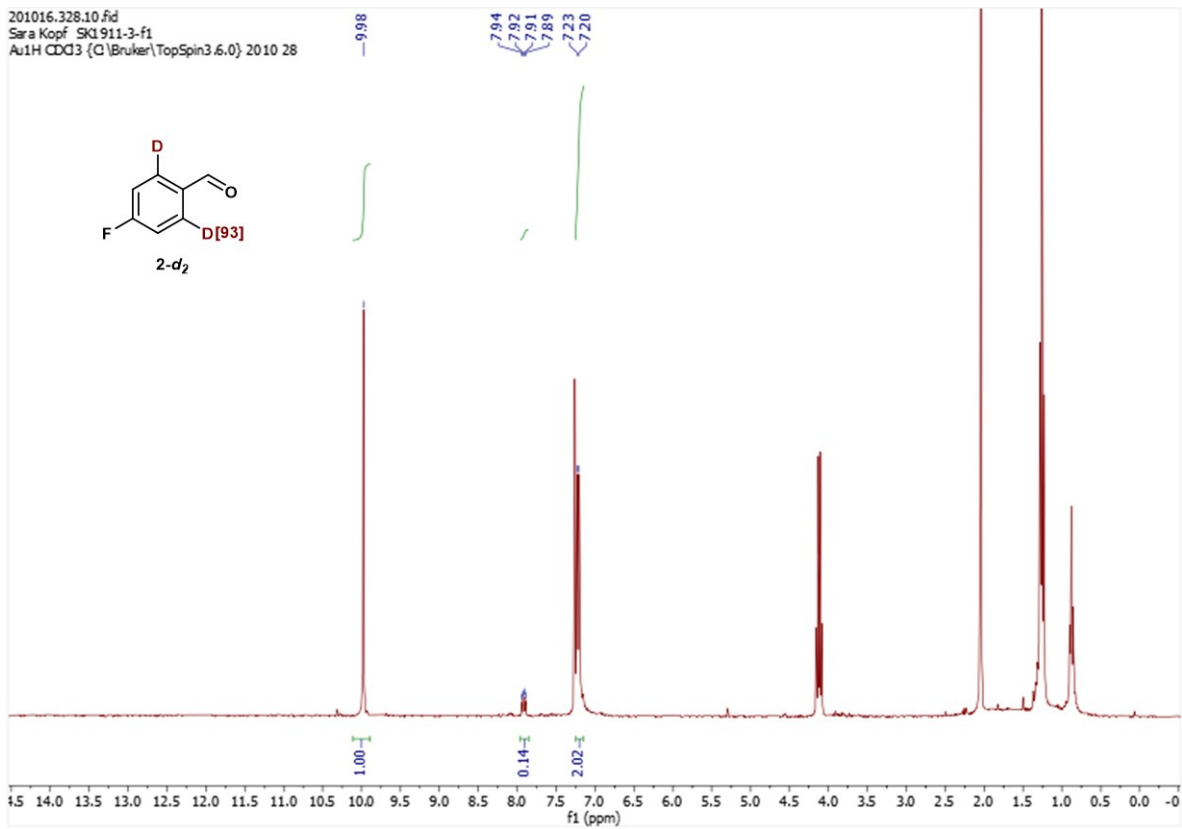

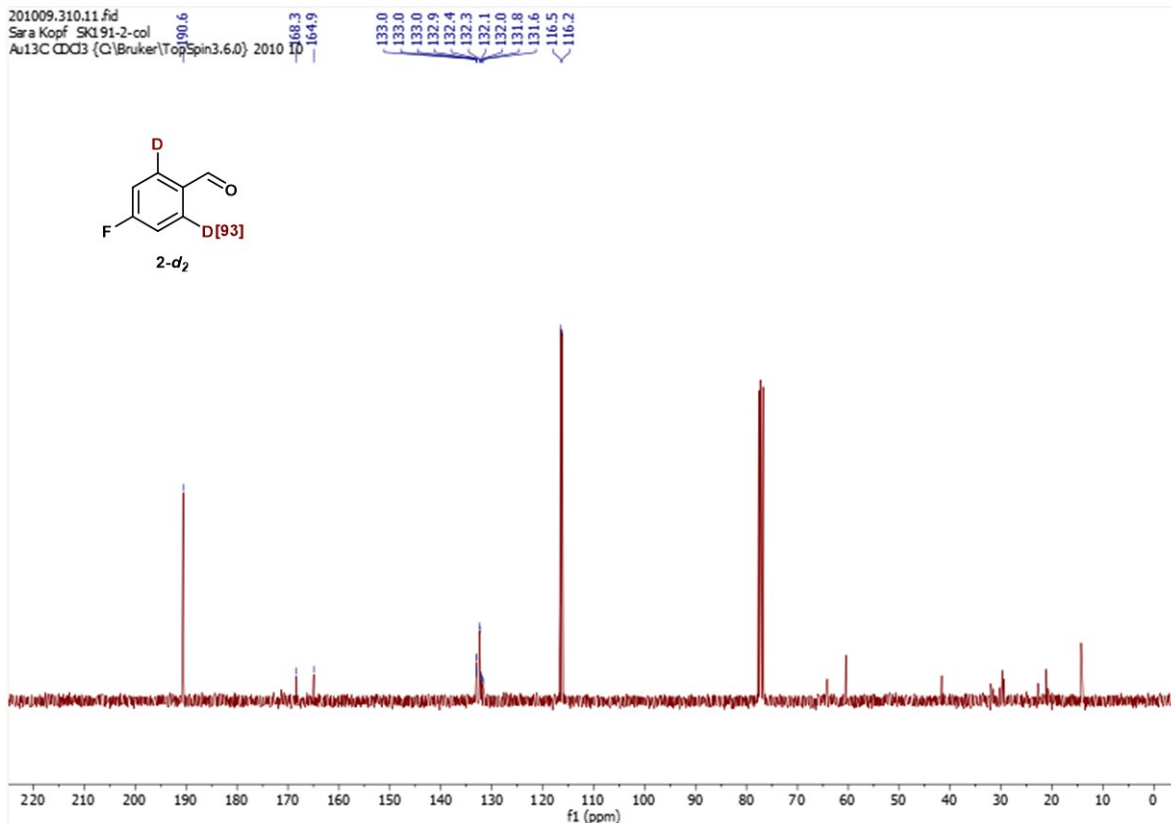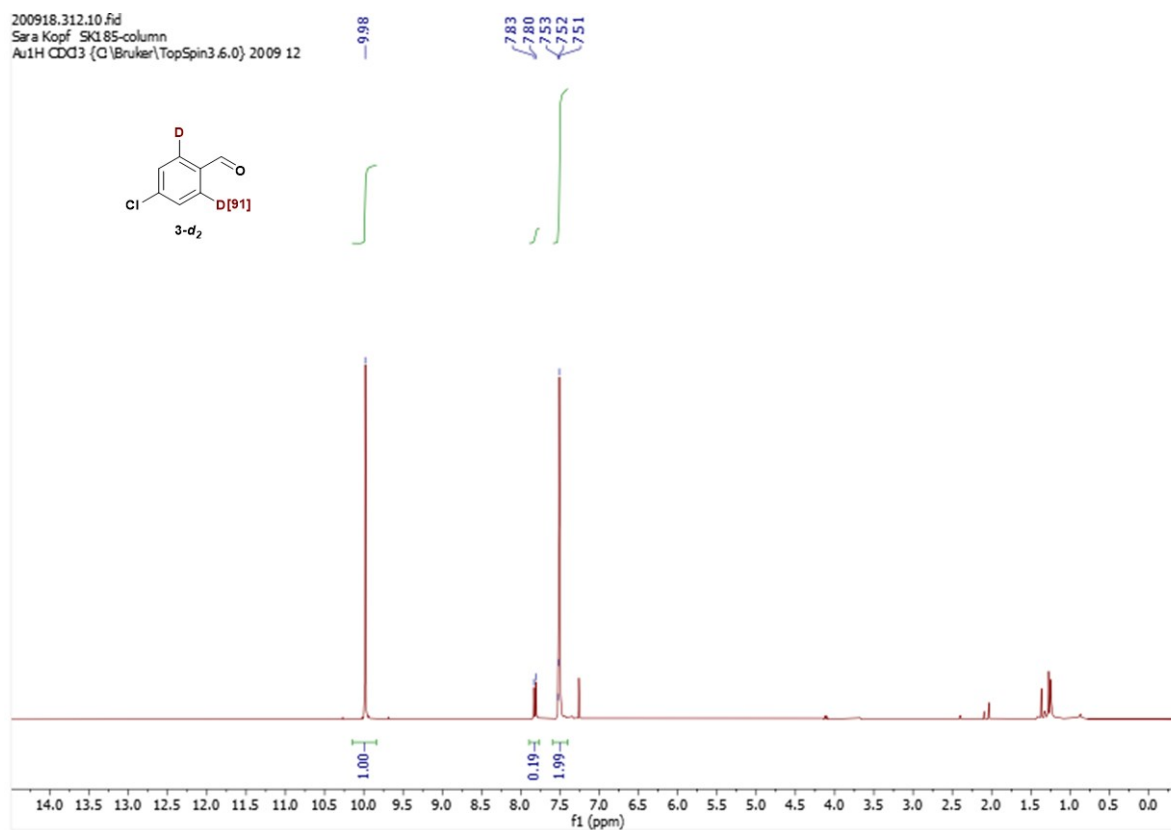



201005.f347.10.fid  
Sara Kopf SK187c-f1  
PROTON CDCl3 (C:\Bruker\TopSpin3.6.0) 2010 47

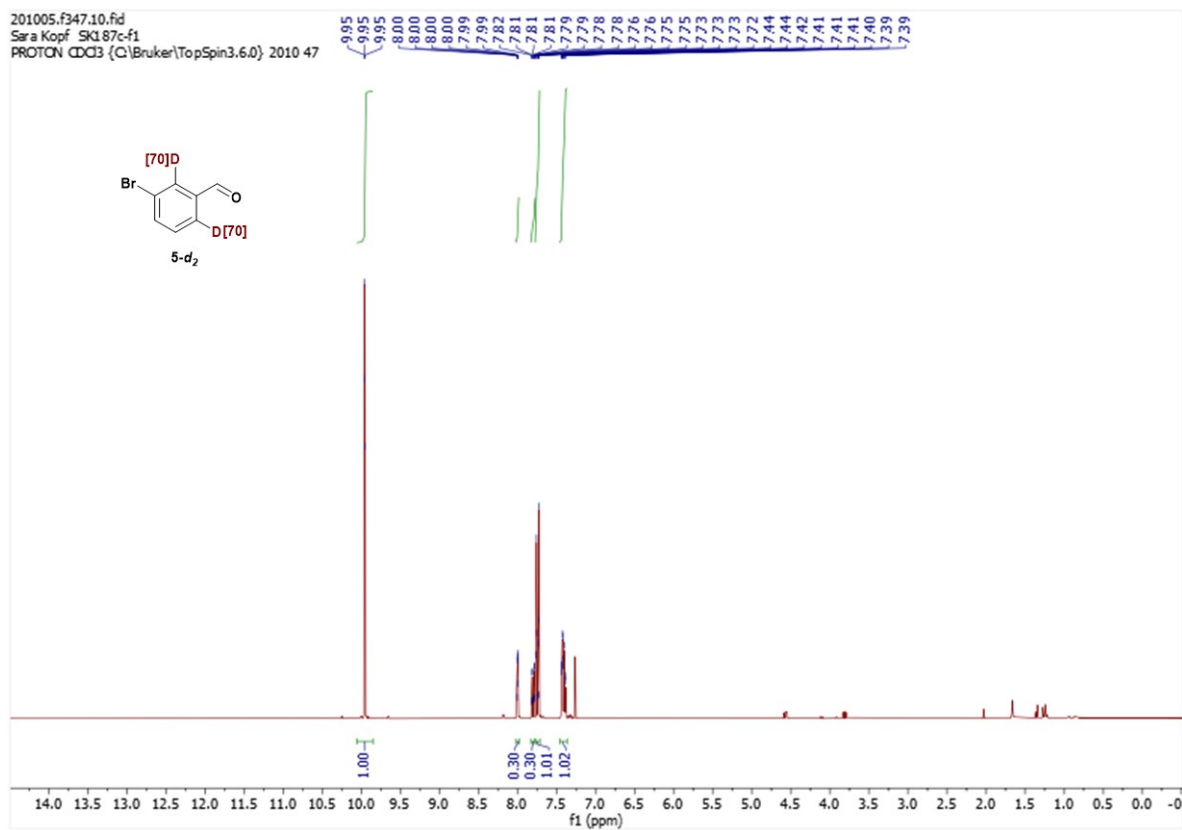

200824.412.10.fid  
Sara Kopf SK141-f2  
Au13C CDCl3 (C:\Bruker\TopSpin3.5pl6) 2008 12

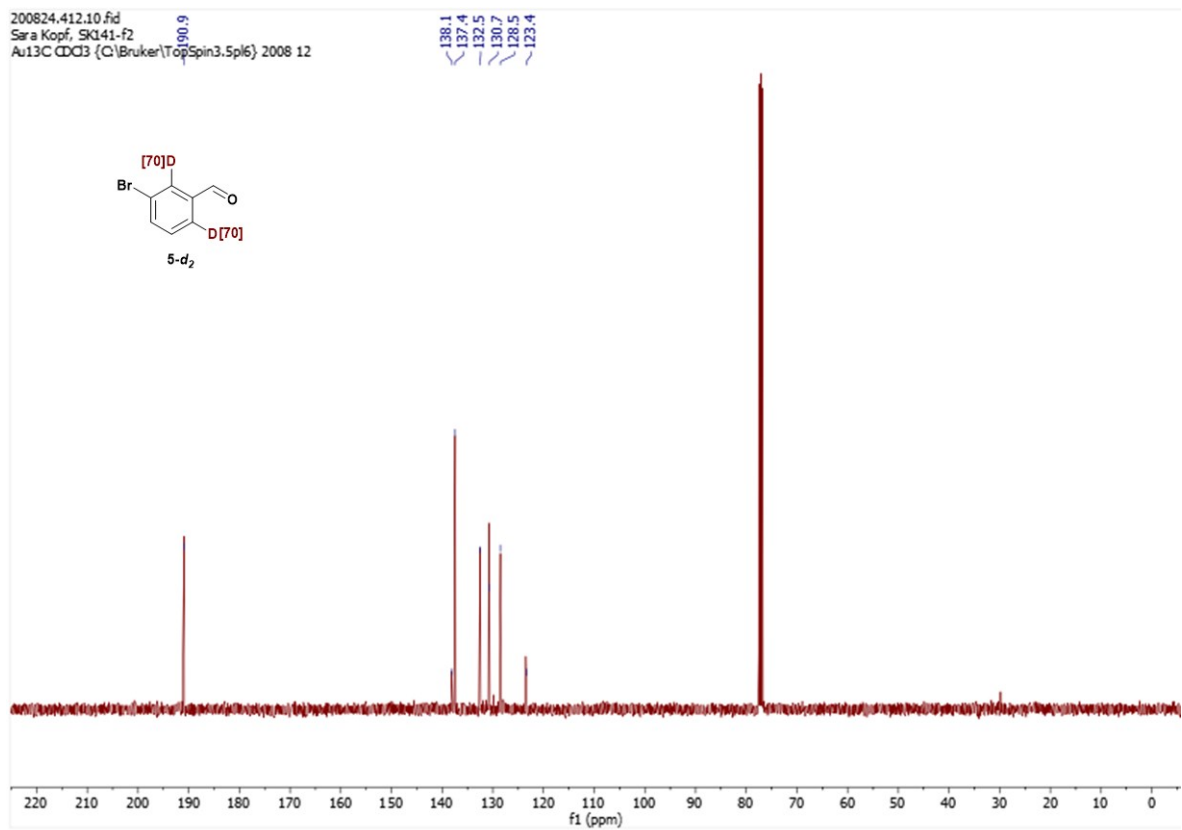

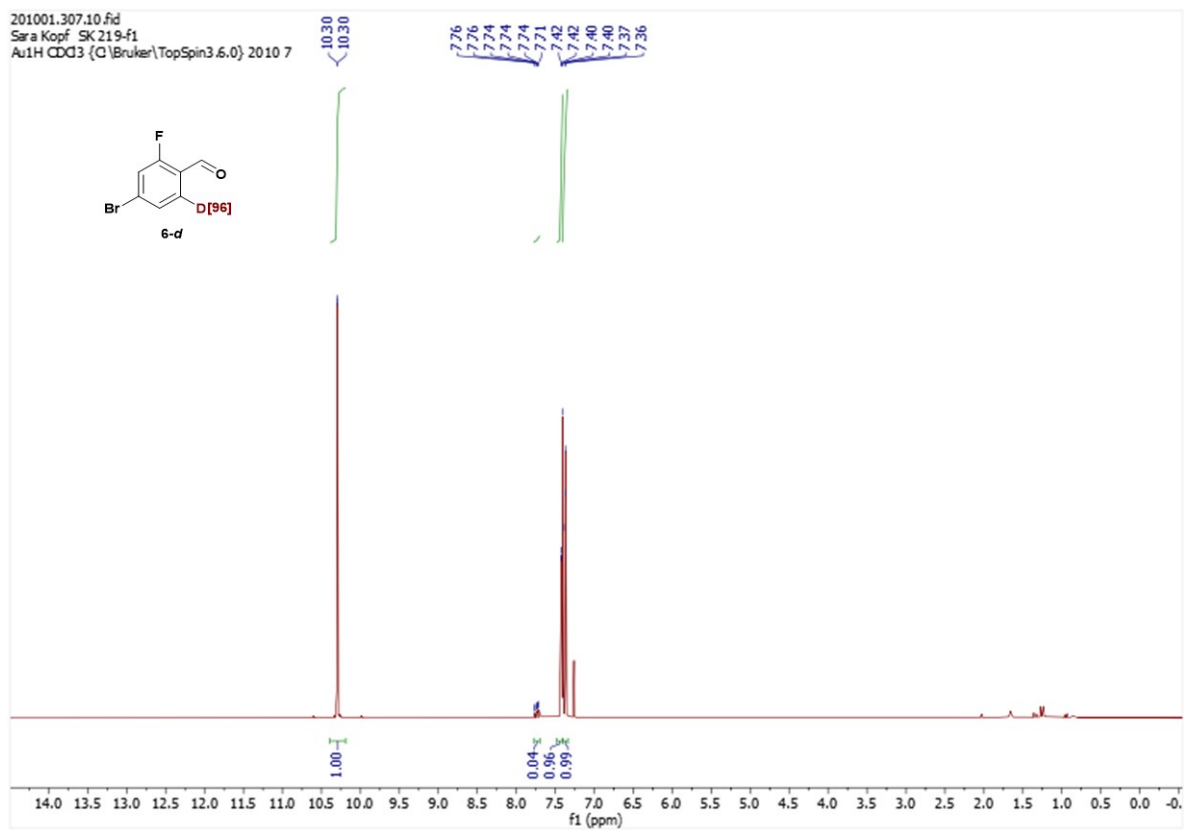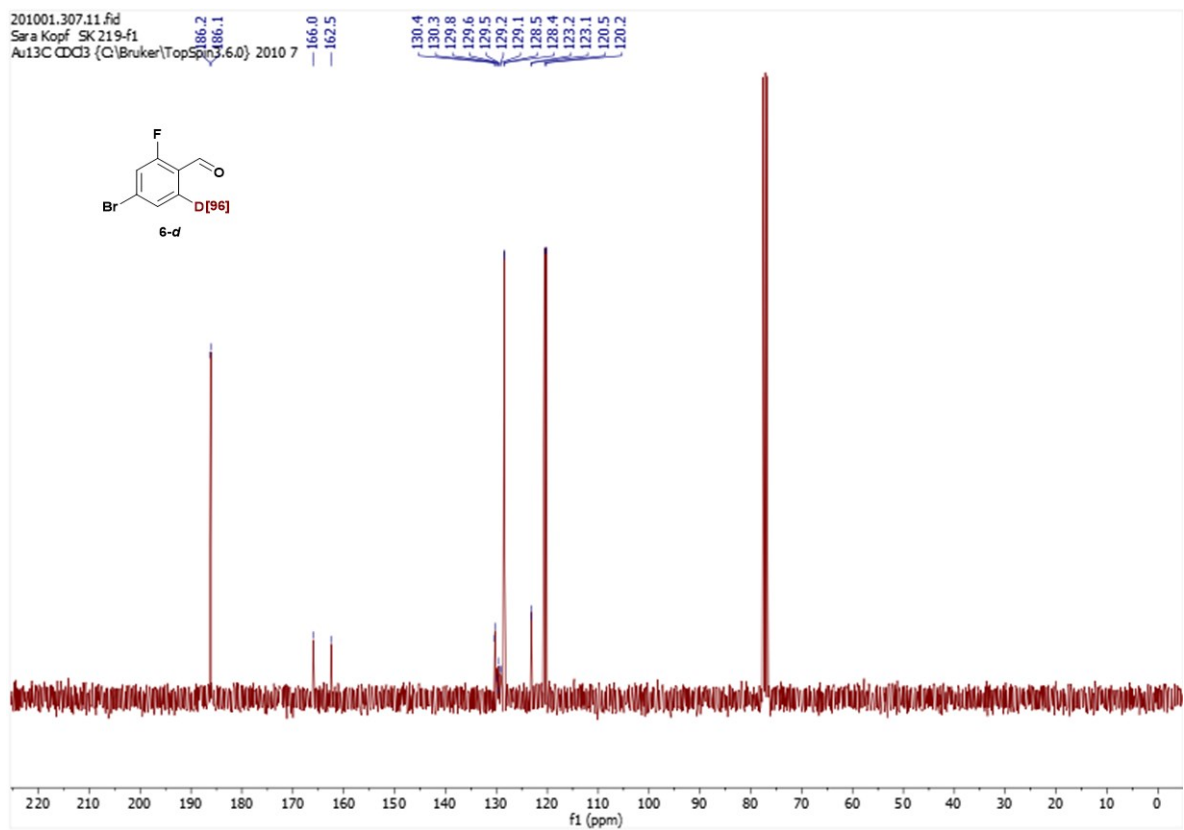



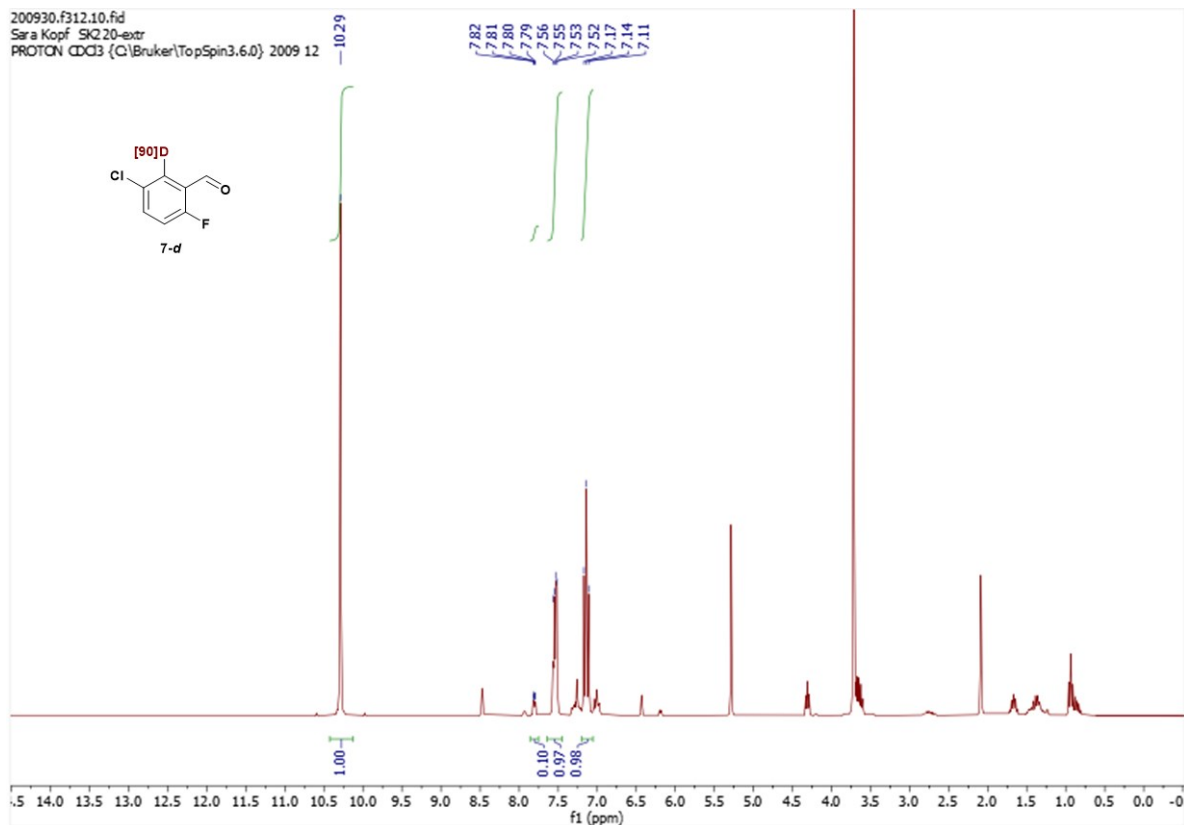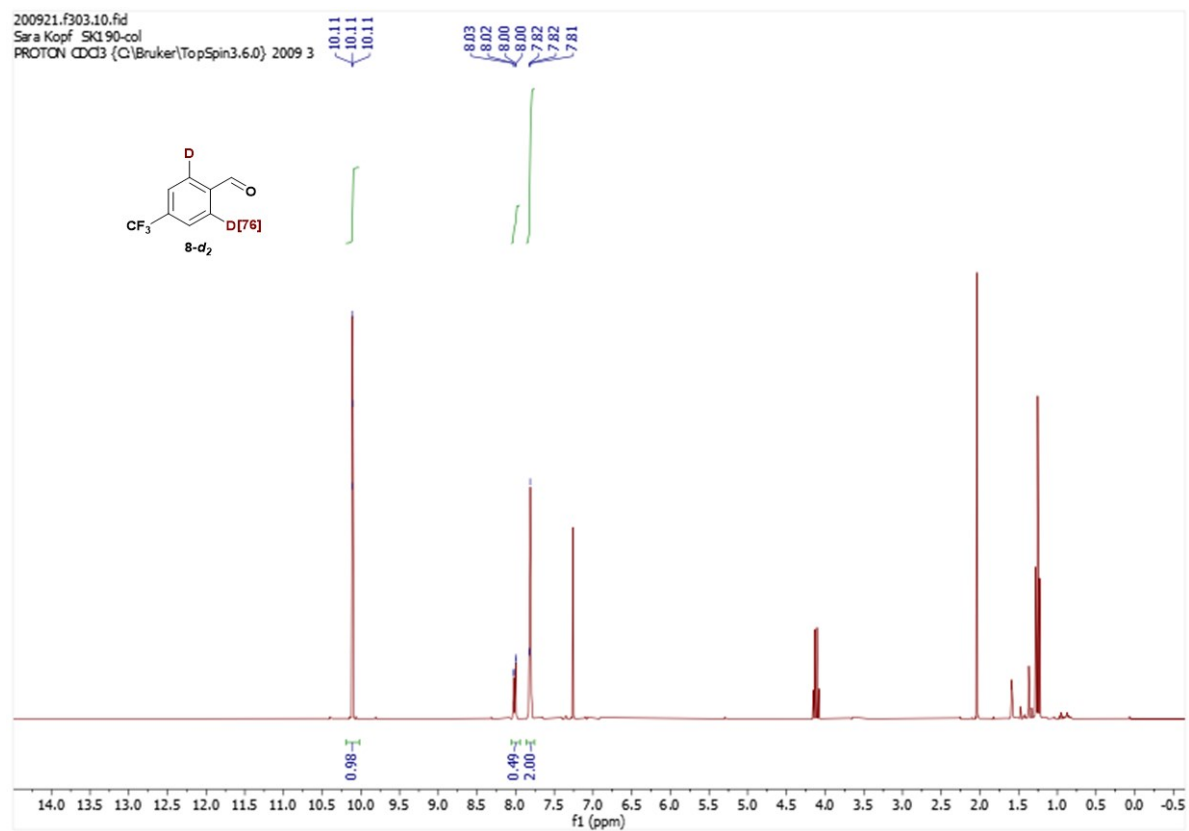

200921.f303.11.fid  
Sara Kopf SK190-col  
Cl3CPD CDCl3 (C:\Bruker\TopSpin3.6.0) 2009 3

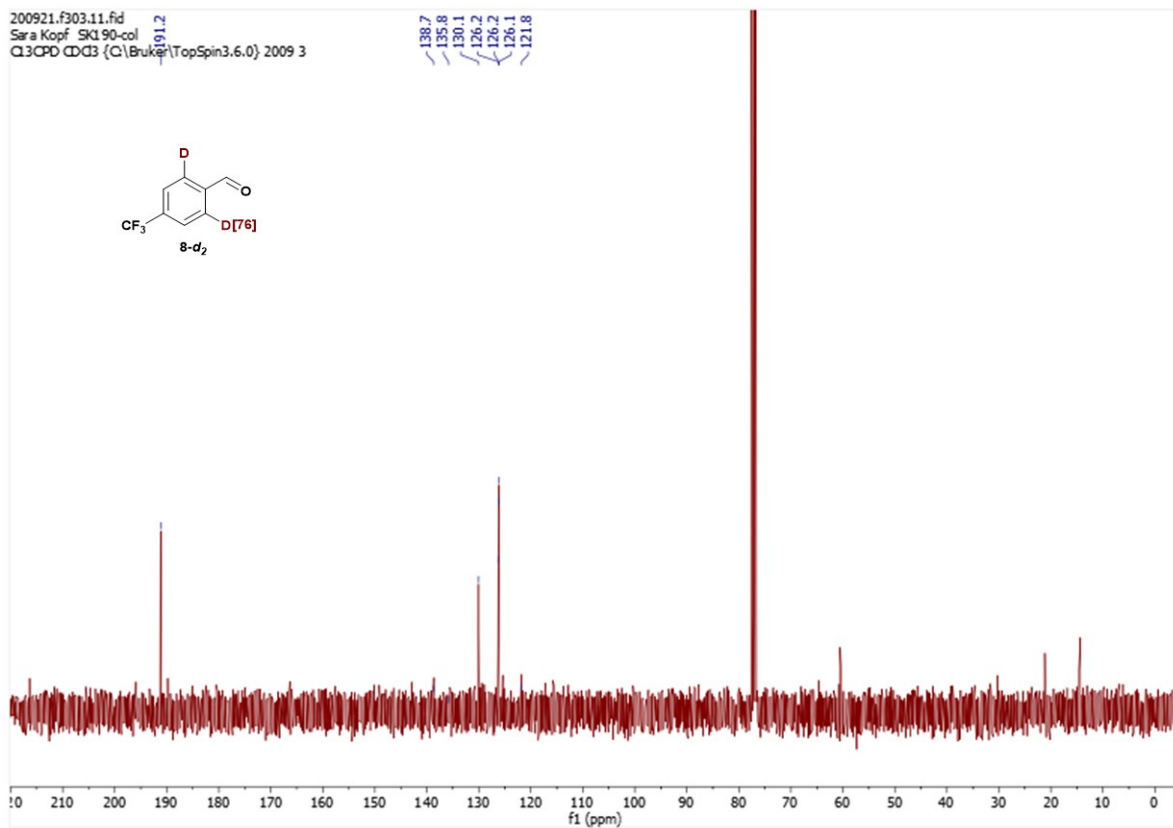

200925.f337.10.fid  
Sara Kopf SK186-c2-f1  
PROTON CDCl3 (C:\Bruker\TopSpin3.6.0) 2009 37

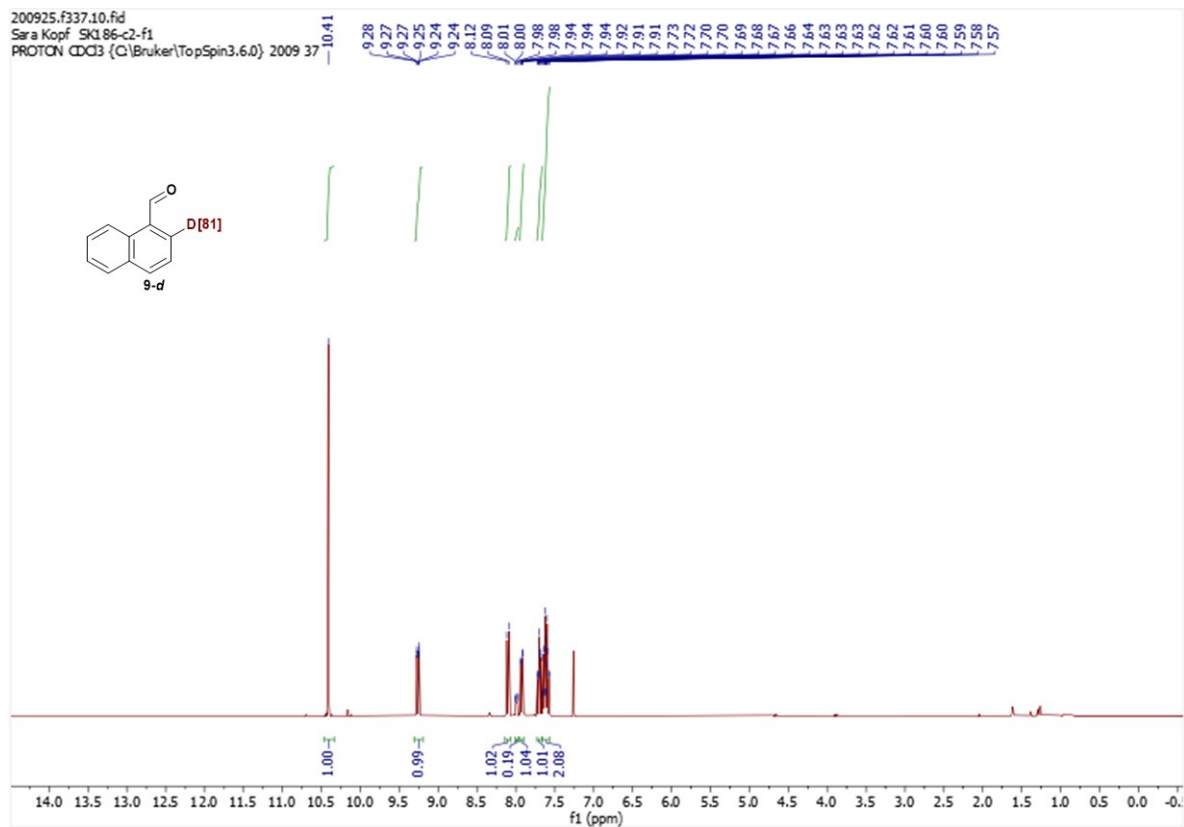

200921.f304.11.fid  
Sara Kopf SK186-f1  
Cl3CPD CDCl3 (C|Bruker|TopSpin3.6.0) 2009 4

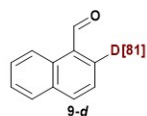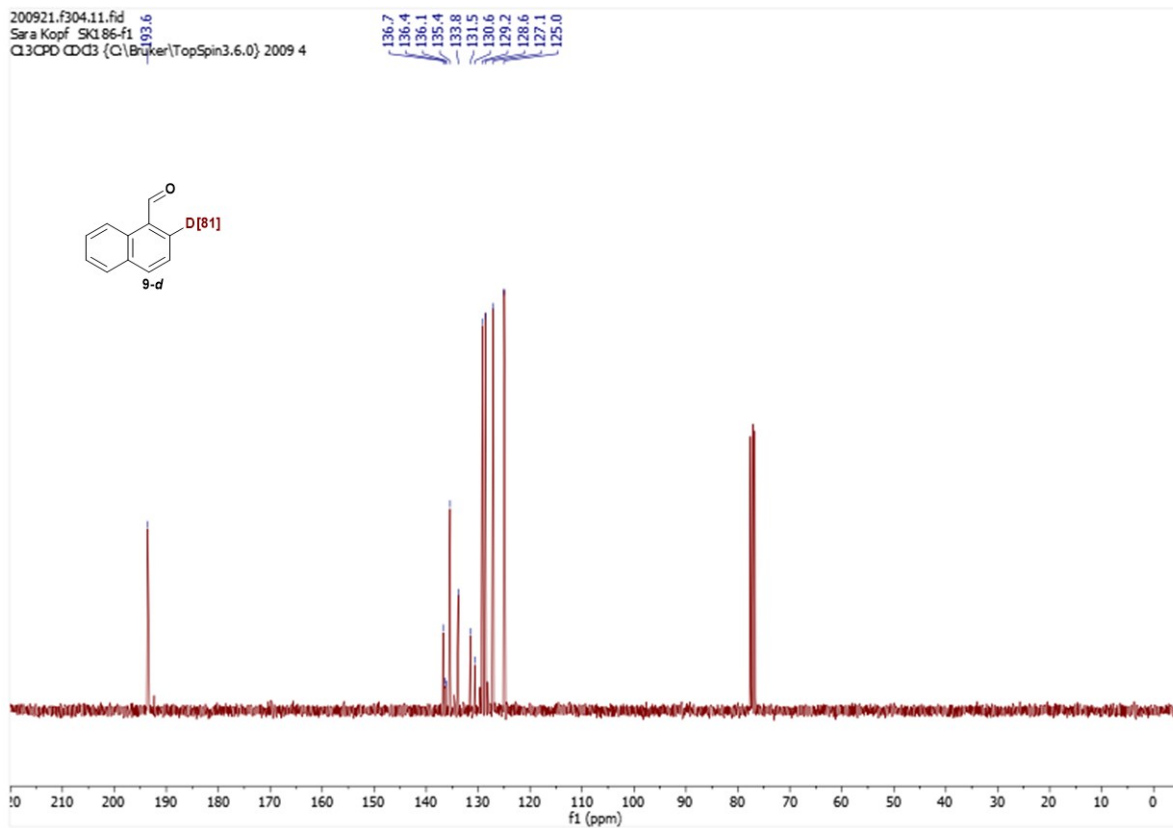

201008.317.10.fid  
Sara Kopf SK188-2-col  
Au1H CDCl3 (C|Bruker|TopSpin3.6.0) 2010 17

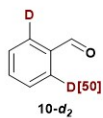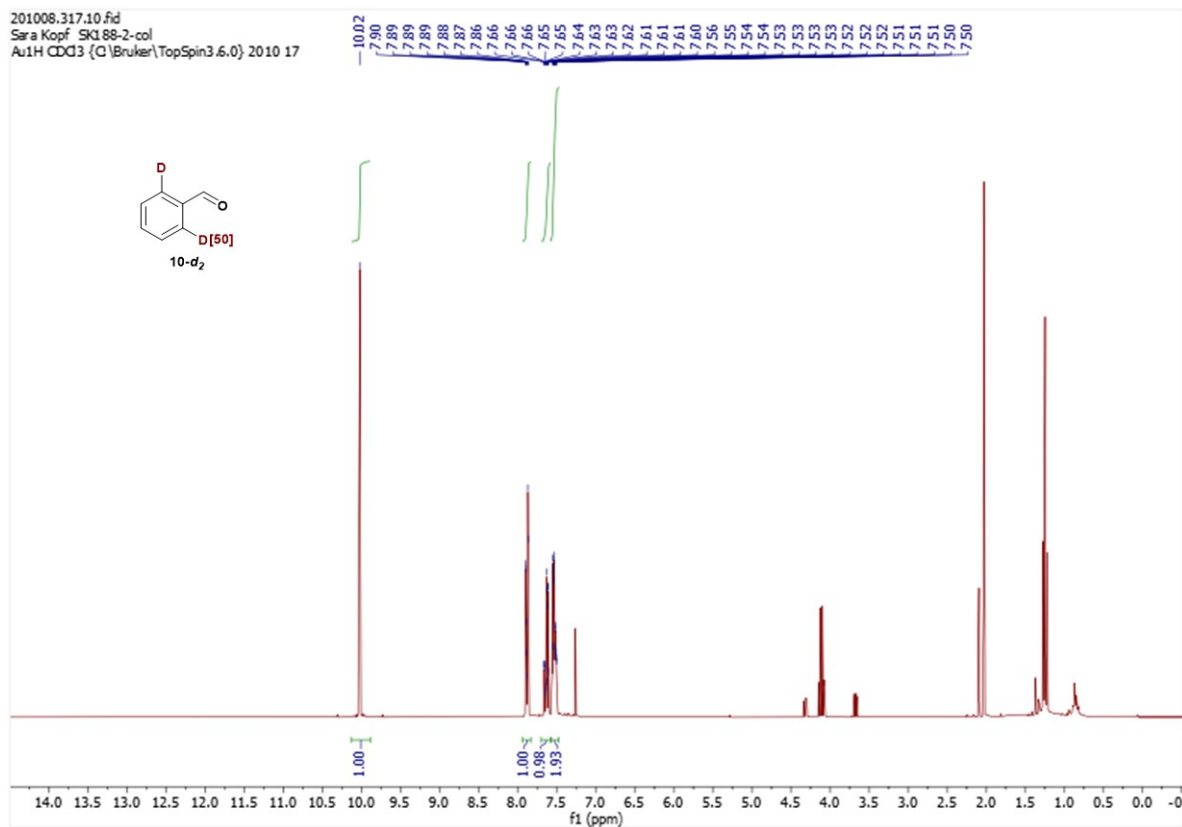

201008.317.11.fid  
Sara Kopf SK188-2-col  
Au13C CDCl3 (C:\Bruker\TopSpin3.6.0) 2010 17

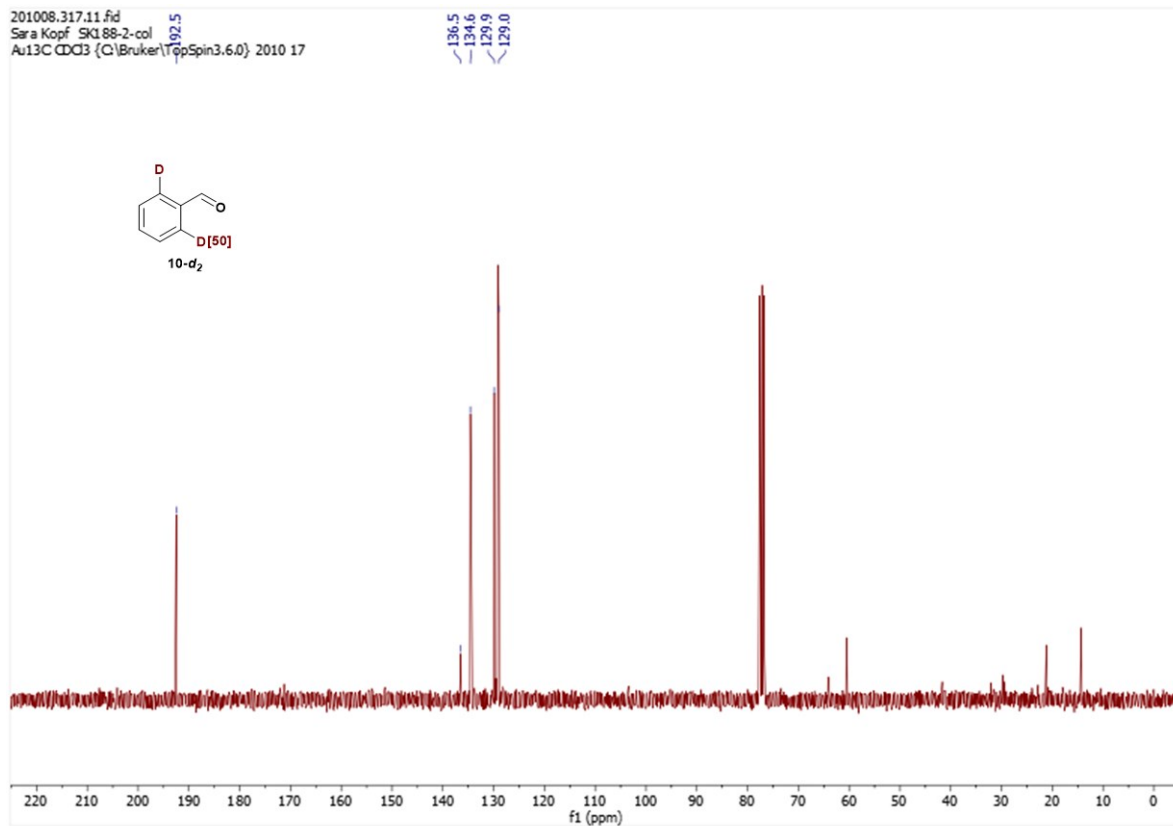

201013.334.10.fid  
Sara Kopf SK205c-f1  
Au1H CDCl3 (C:\Bruker\TopSpin3.6.0) 2010 34

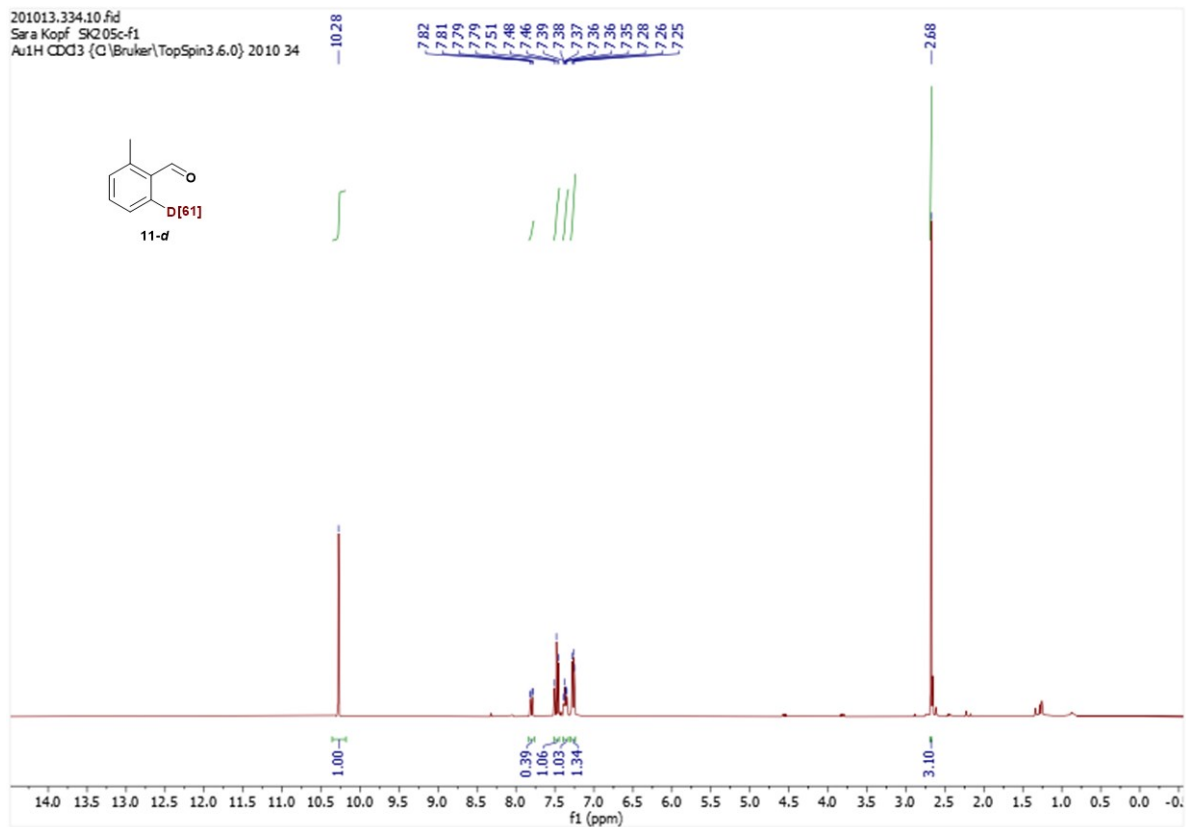

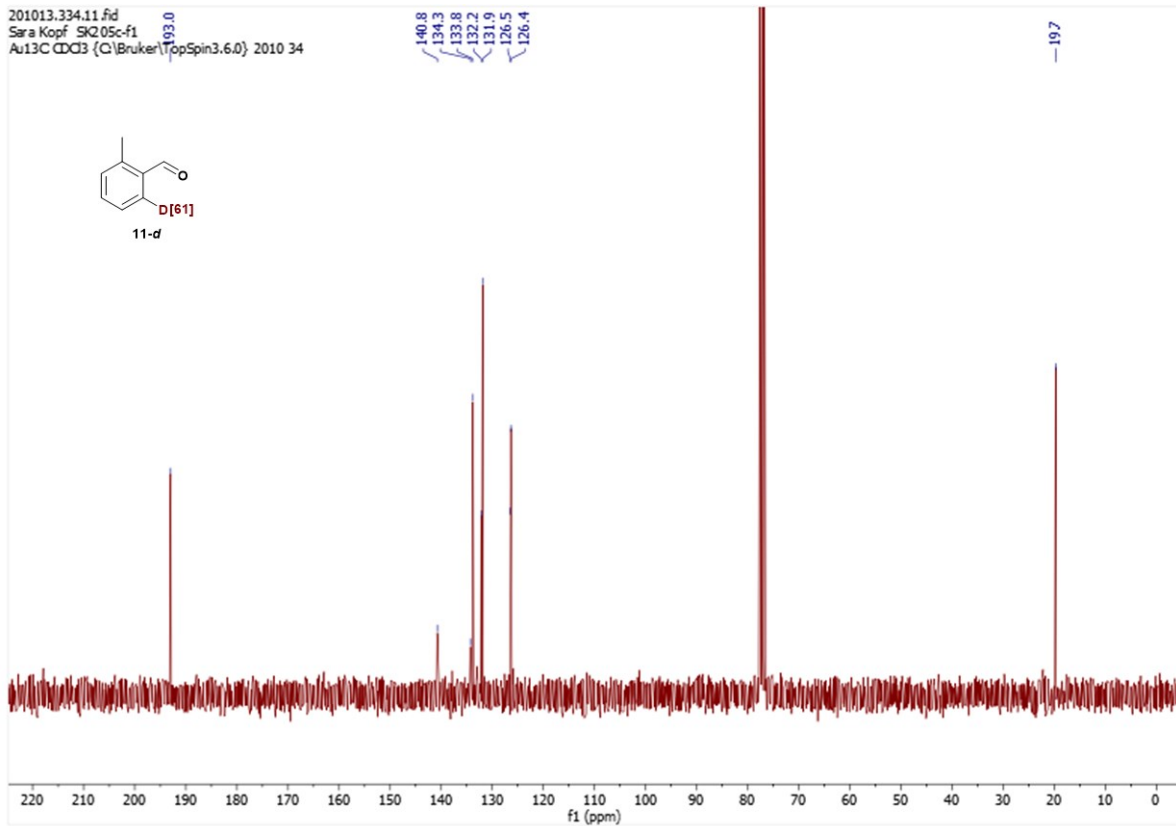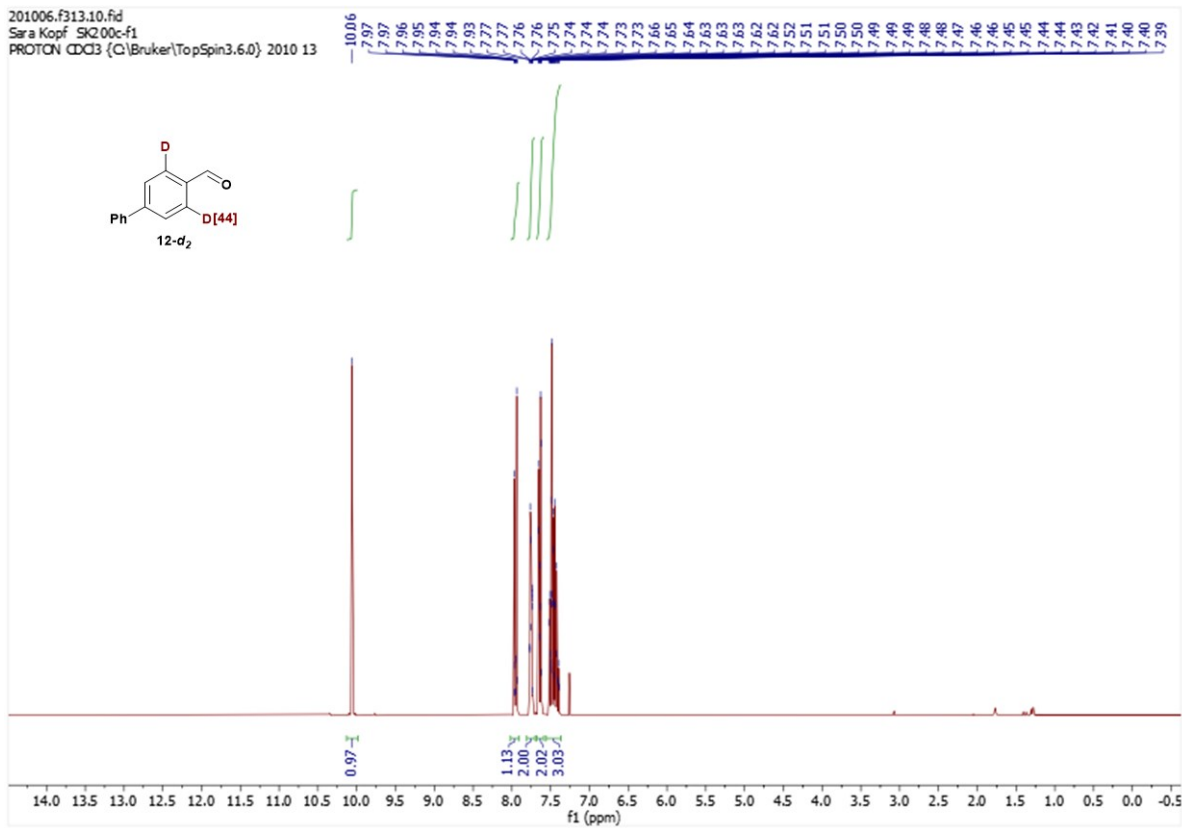

201006.f313.11.fid  
Sara Kopf SK200c-f1  
Cl3CPD CDCl3 (C\Bruker\TopSpin3.6.0) 2010 13

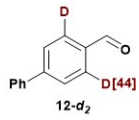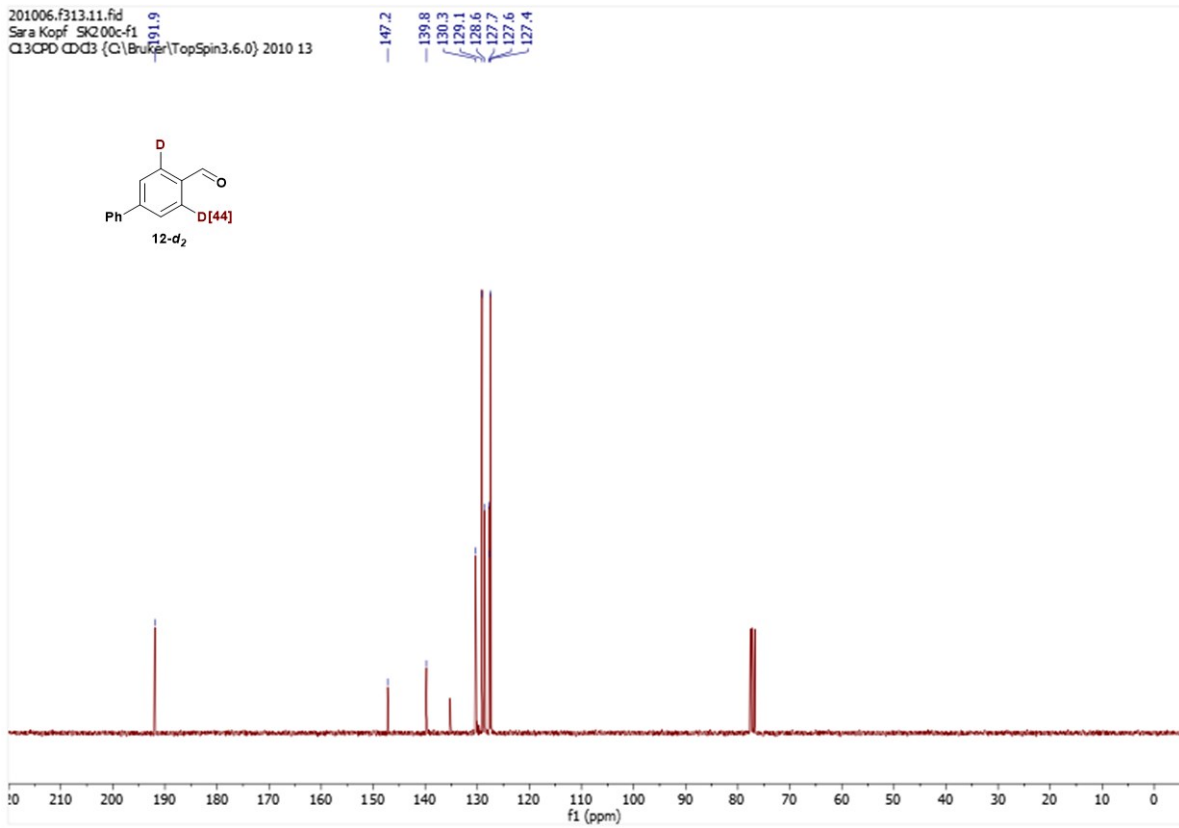

201005.328.10.fid  
Sara Kopf SK148c-f1  
Au1H CDCl3 (C\Bruker\TopSpin3.6.0) 2010 28

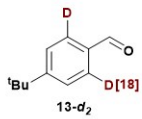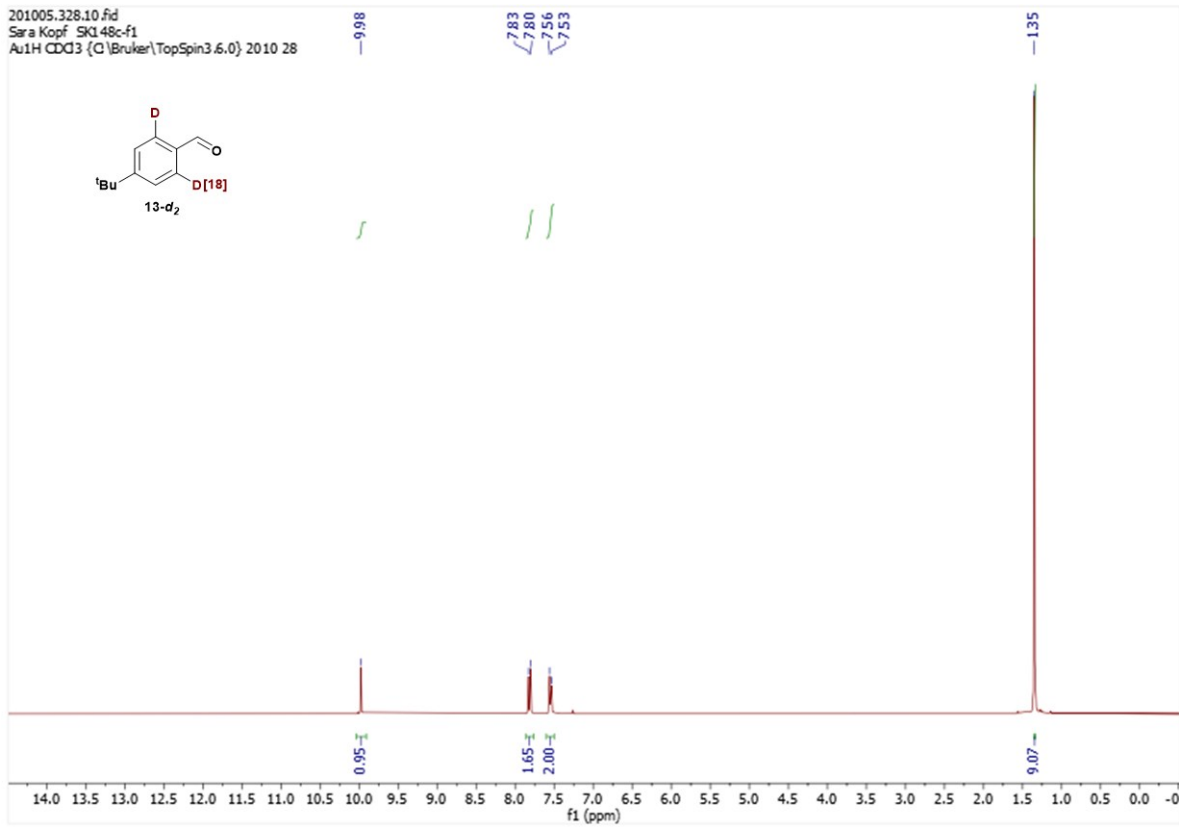

201005.328.11.fid  
Sara Kopf SK148c-f1  
Au13C CDCl3 {C:\Bruker\TopSpin3.6.0} 2010 28

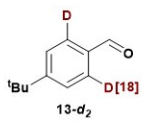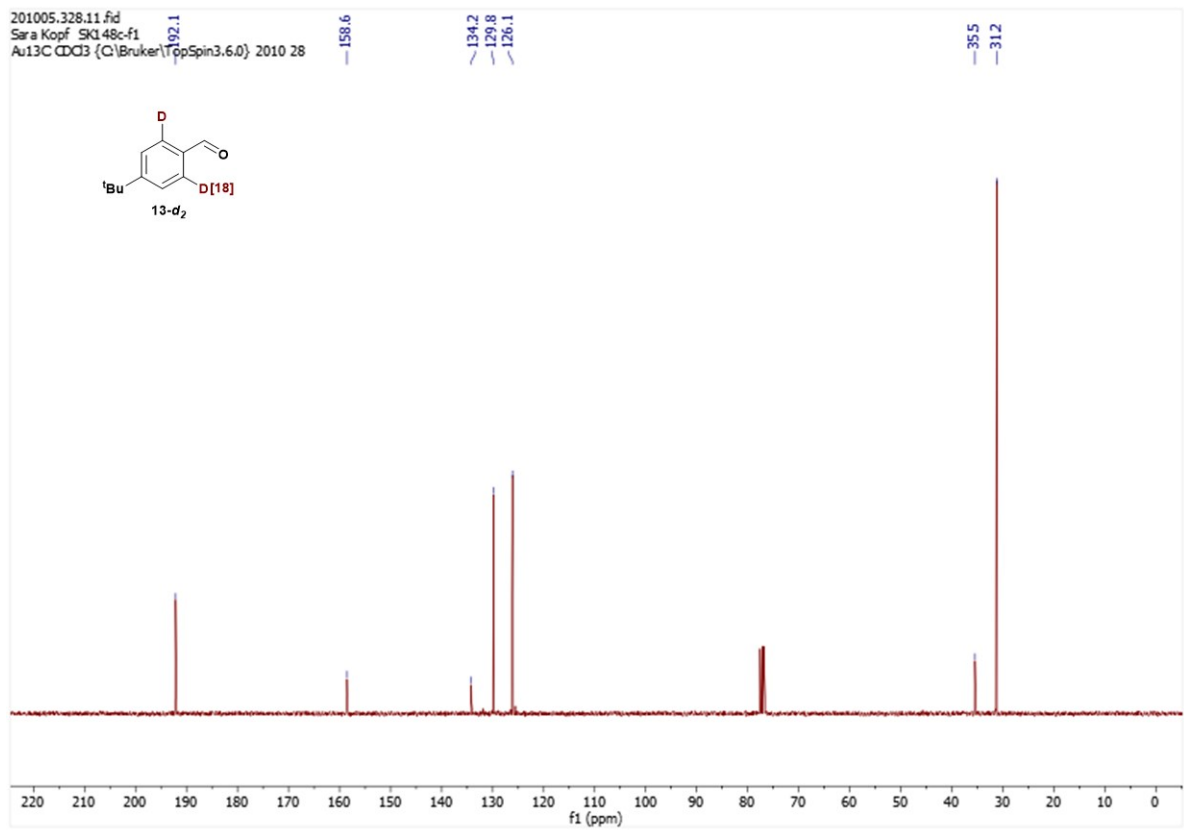

201109.324.10.fid  
Sara Kopf SK218e-col  
Au1H CDCl3 {C:\Bruker\TopSpin3.6.0} 2011 24

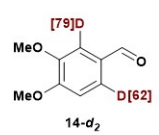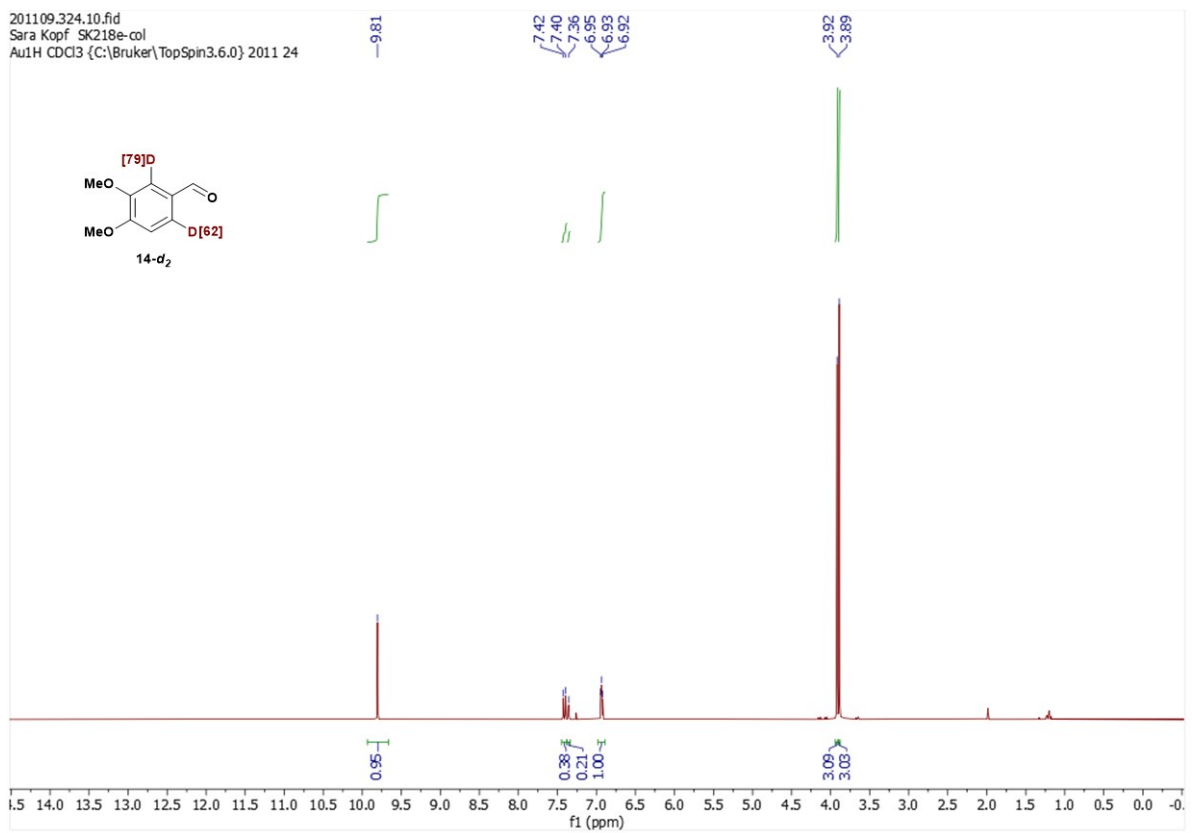

201110.303.10.fid  
Sara Kopf SK218e-col  
Au13C CDCl3 {C:\Bruker\TopSpin3.6.0} 2011 3

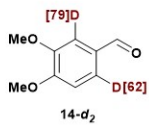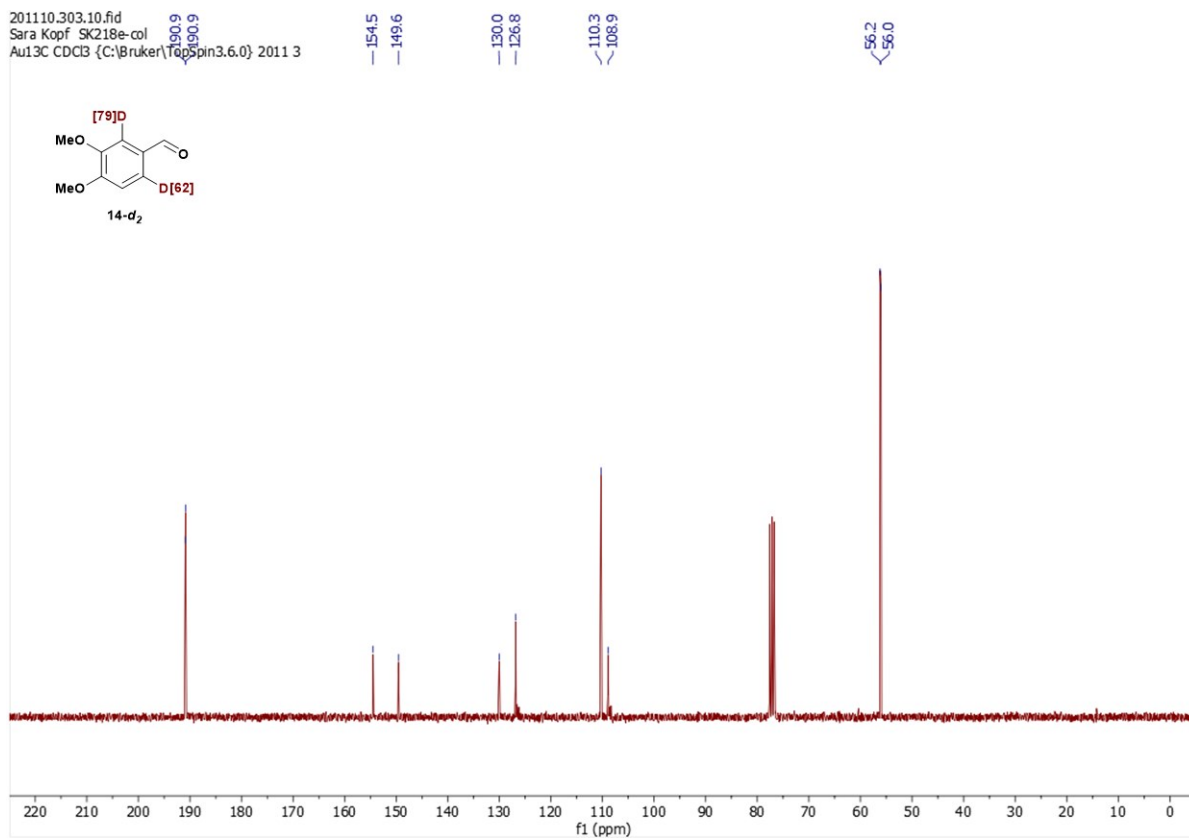

201005.f346.10.fid  
Sara Kopf SK154c-f2  
PROTON CDCl3 {C:\Bruker\TopSpin3.6.0} 2010 46

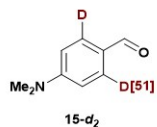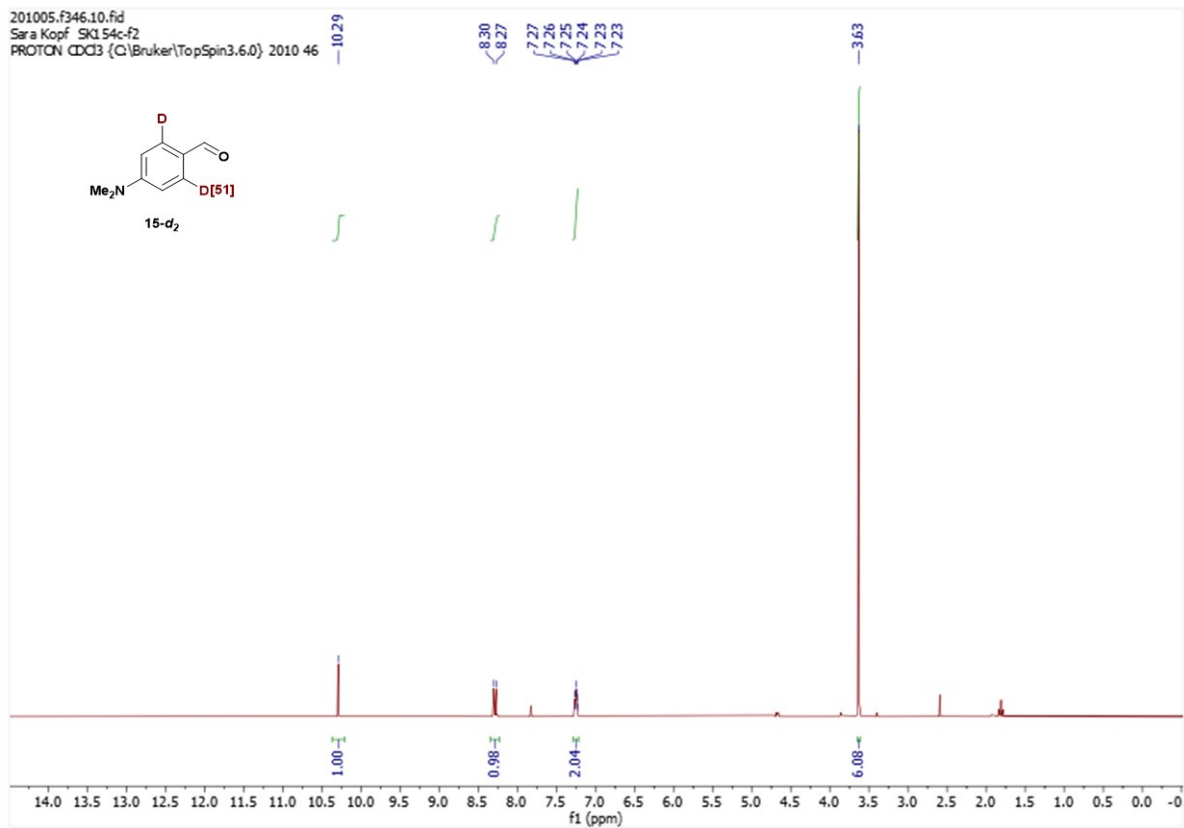



201005.f346.11.fid  
Sara Kopf SK154c-f2  
CL3CPD CDCl3 (C:\Bruker\TopSpin3.6.0) 2010 46

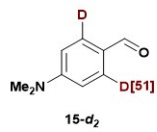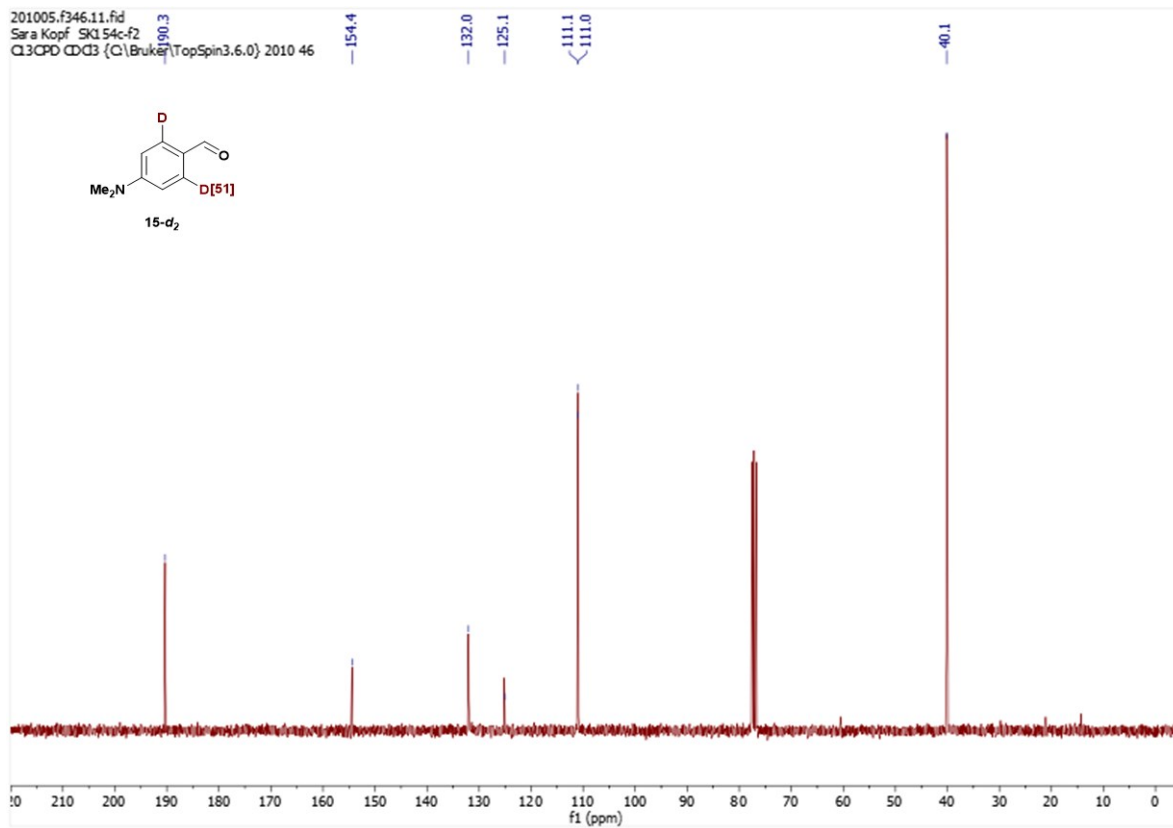

200922.f308.10.fid  
Sara Kopf SK2.01-col  
PROTON CDCl3 (C:\Bruker\TopSpin3.6.0) 2009 8

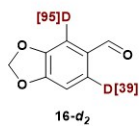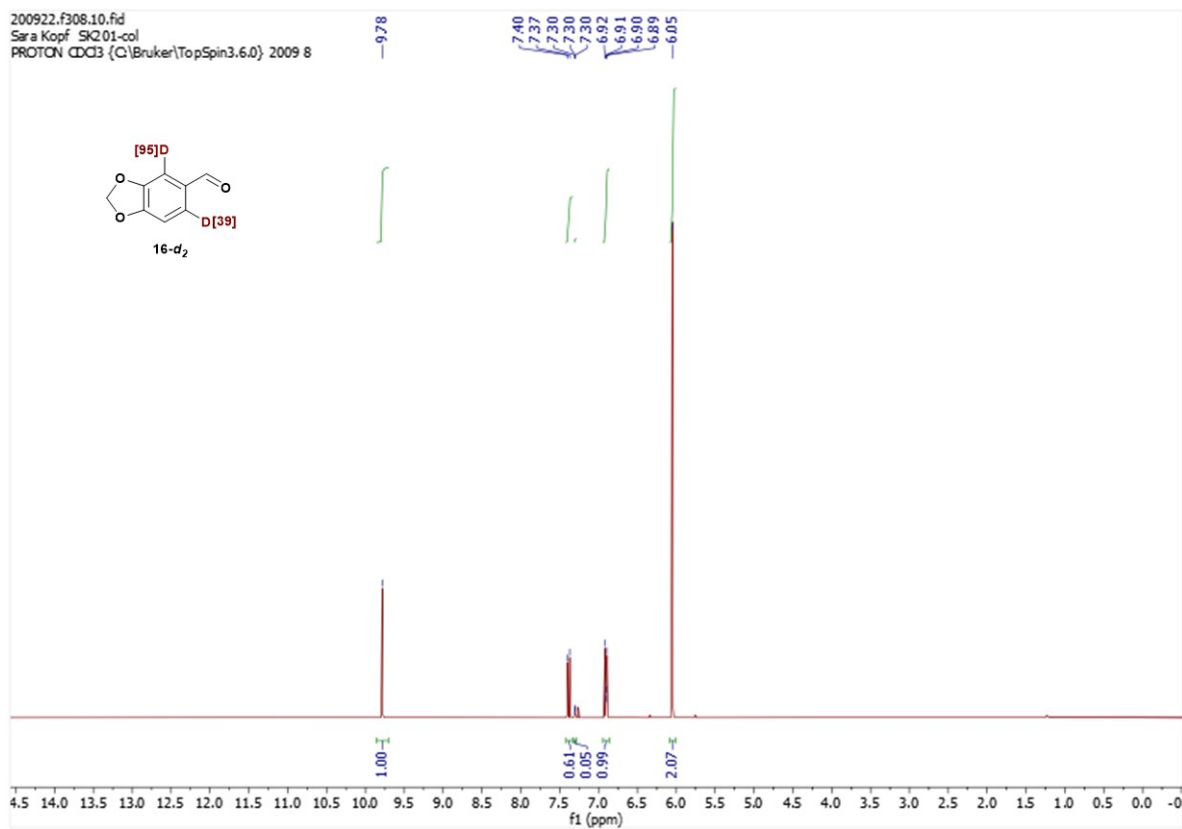

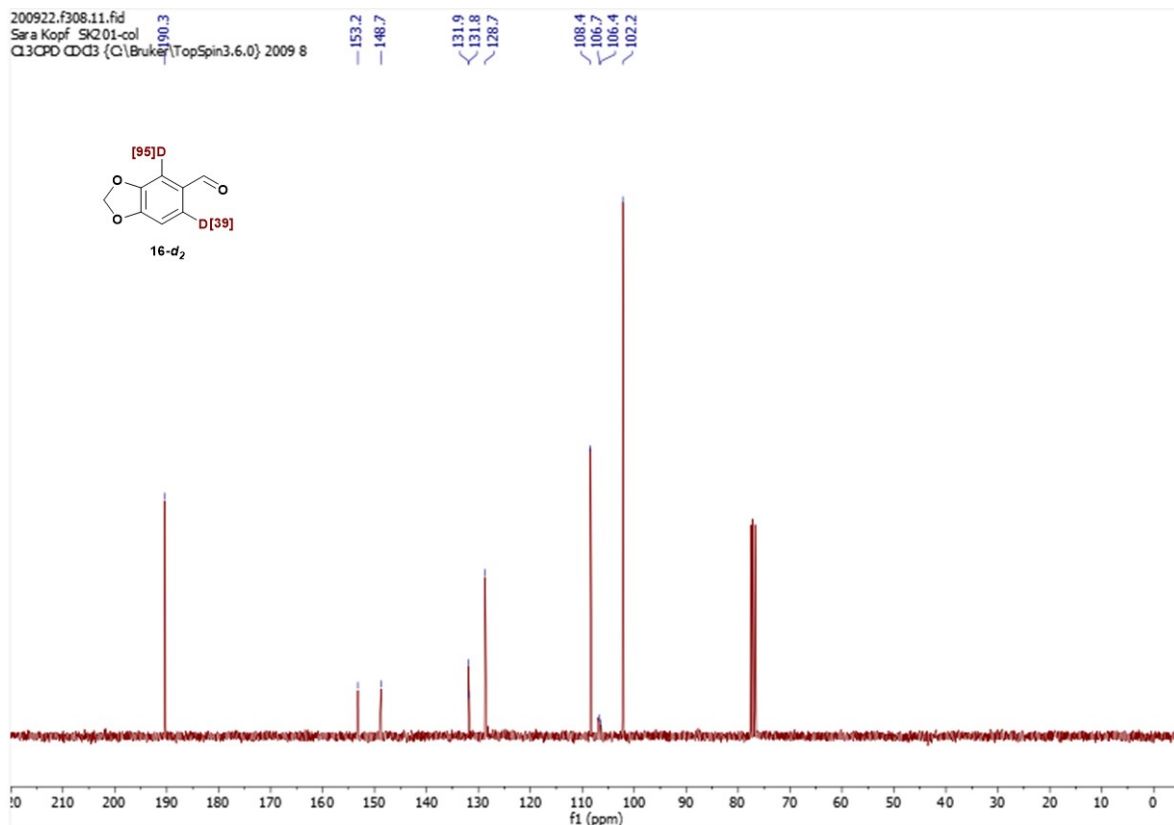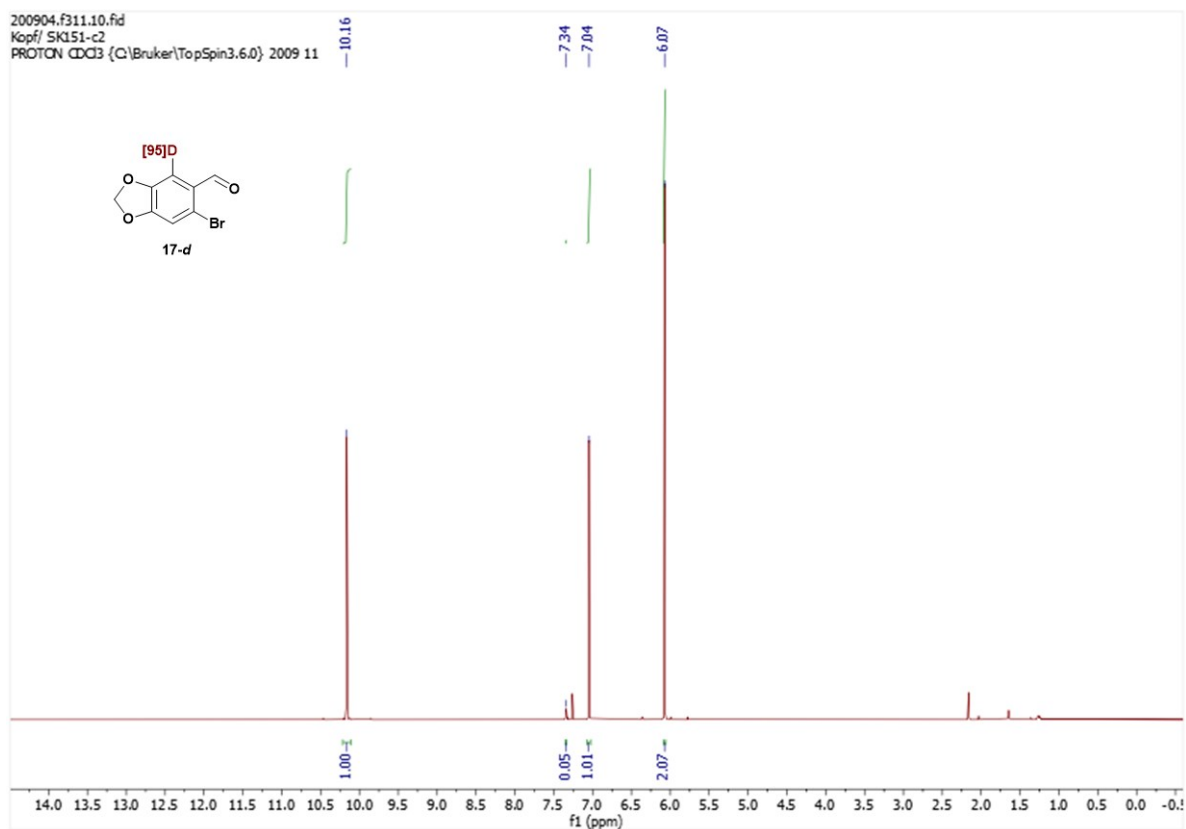

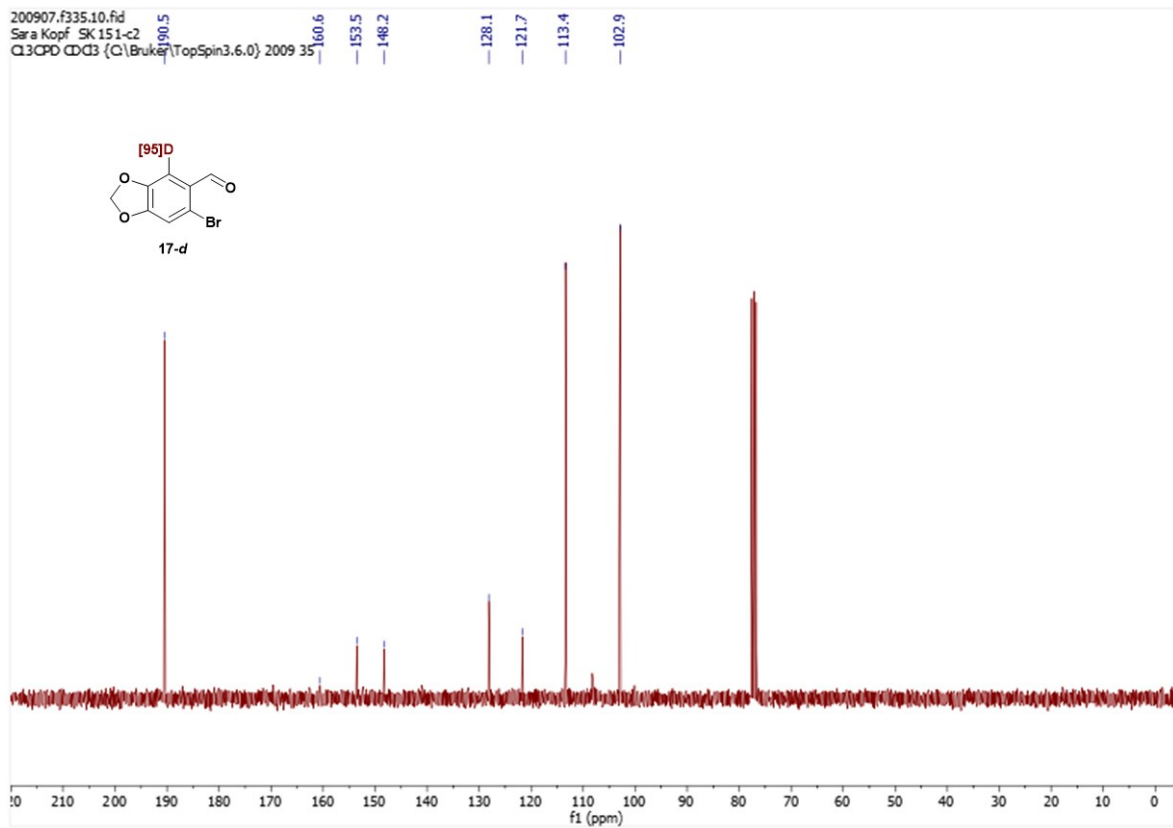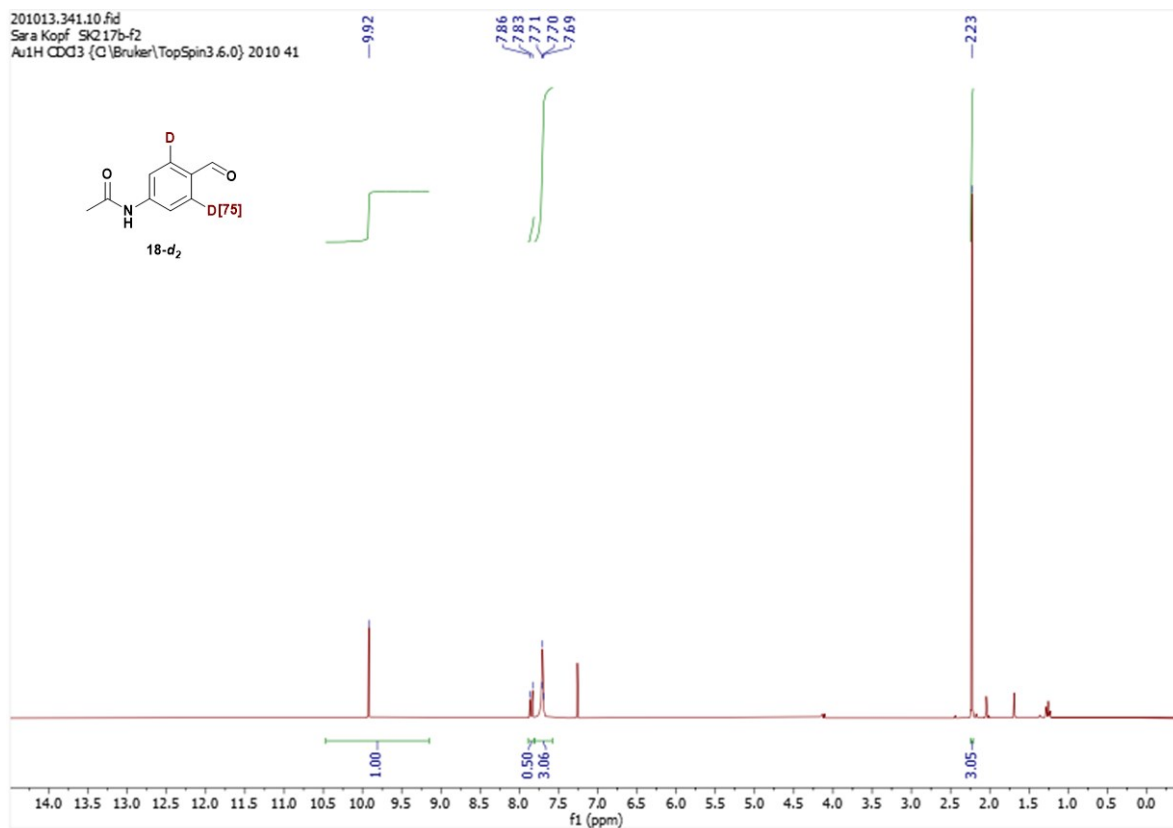

201013.340.11.fid  
Sara Kopf SK217b-f1  
Au13C CDCl3 (C:\Bruker\TopSpin3.6.0) 2010-10-14

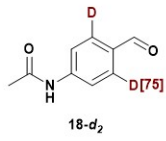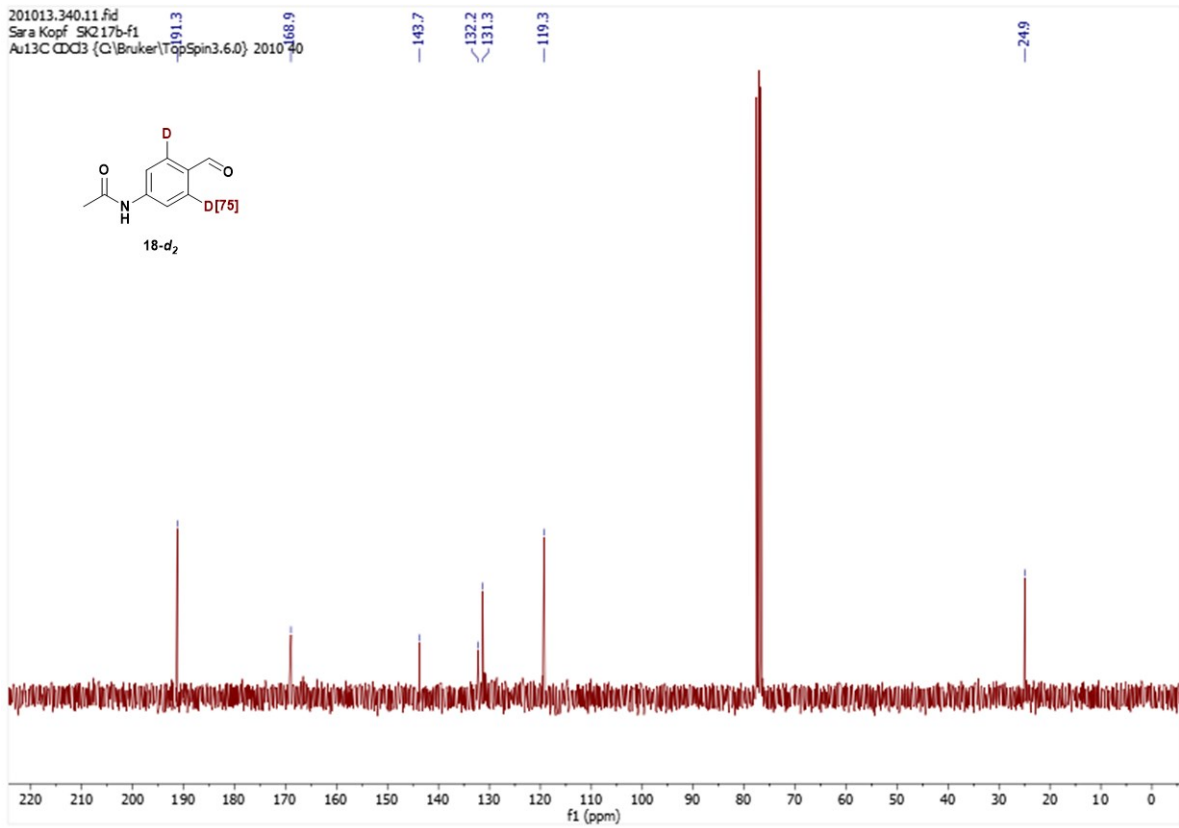

200821.402.10.fid  
Sara Kopf SK135b-f2  
Au1H CDCl3 (C:\Bruker\TopSpin3.5.pl6) 2008-2-10

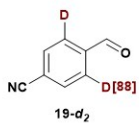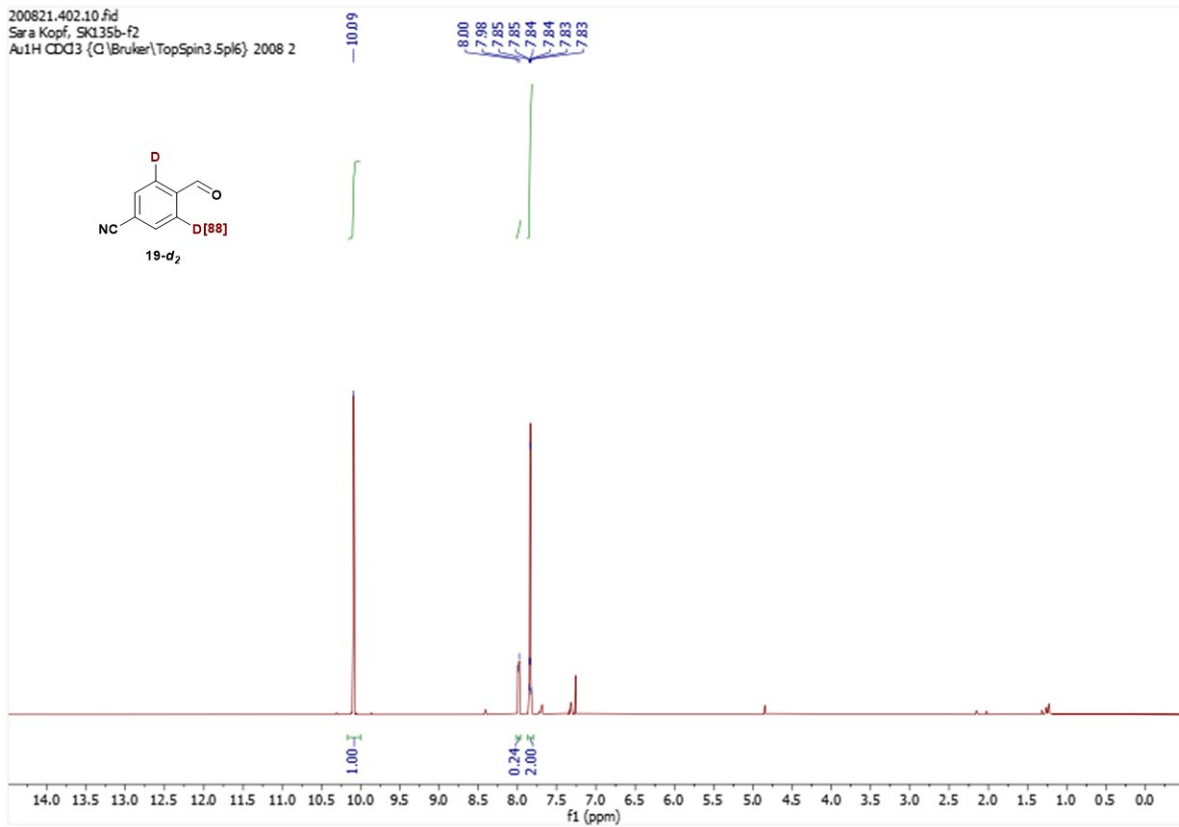

200821.307.10.fid  
Sara Kopf, SK135b-f2  
Au13C CDCl3 (C:\Bruker\TopSpin3.6.0) 2008 7

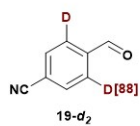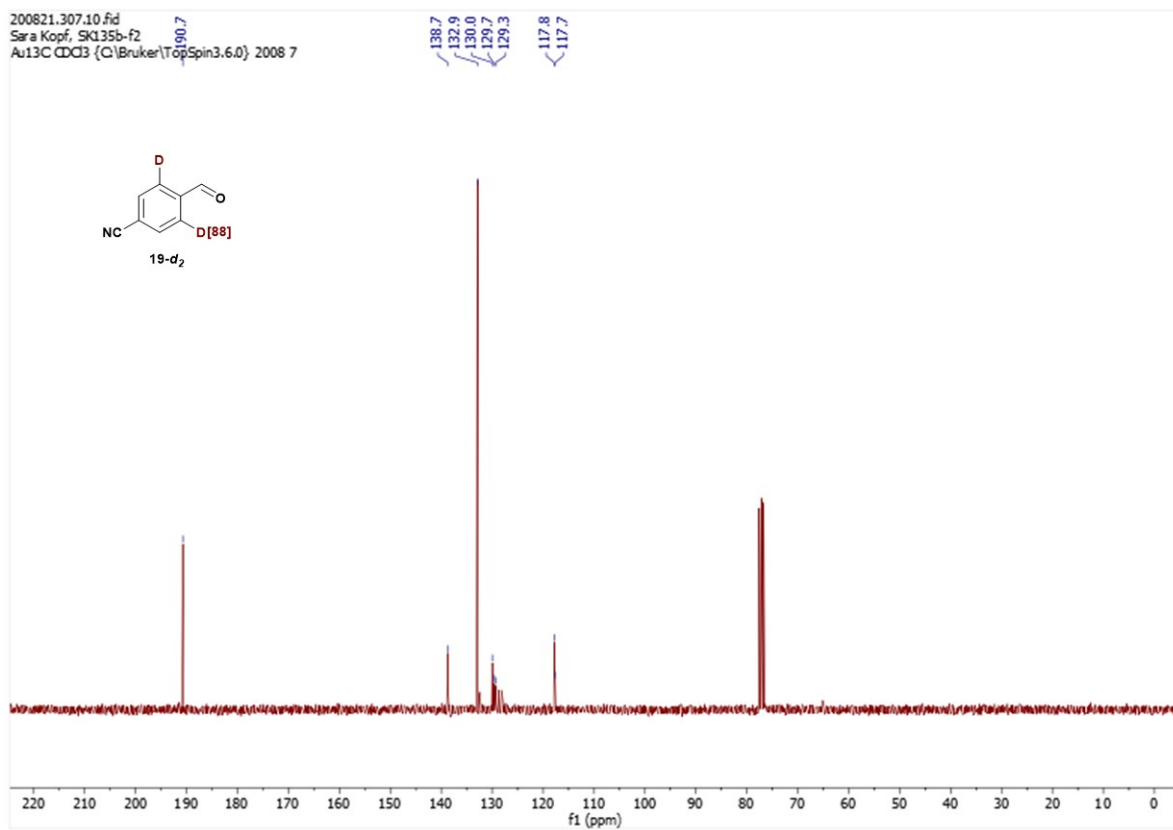

200814.333.10.fid  
S. Kopf, SK131-c2-f2  
Au1H CDCl3 (C:\Bruker\TopSpin3.6.0) 2008 33

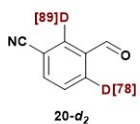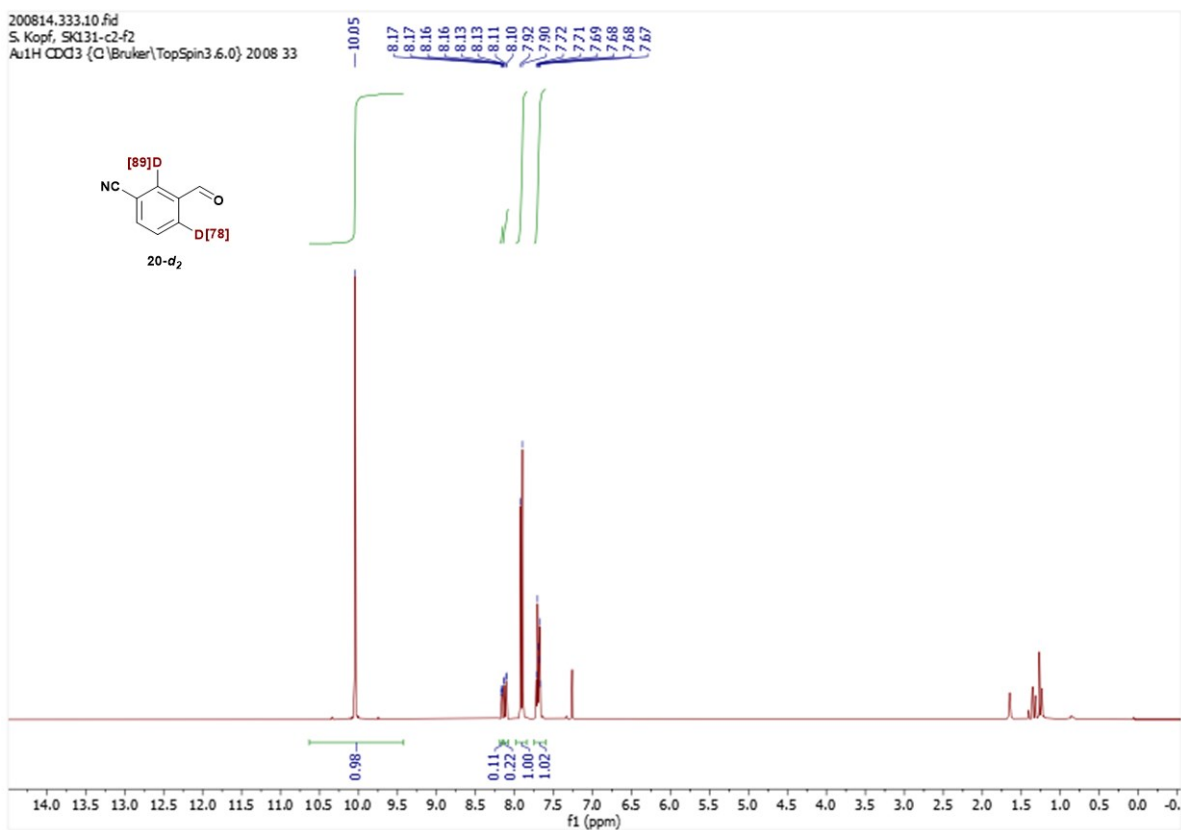

200821.f302.10.fid  
Sara Kopf, SK1366-f2  
PROTON CDCl3 (C:\Bruker\TopSpin3.6.0) 2008 2

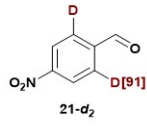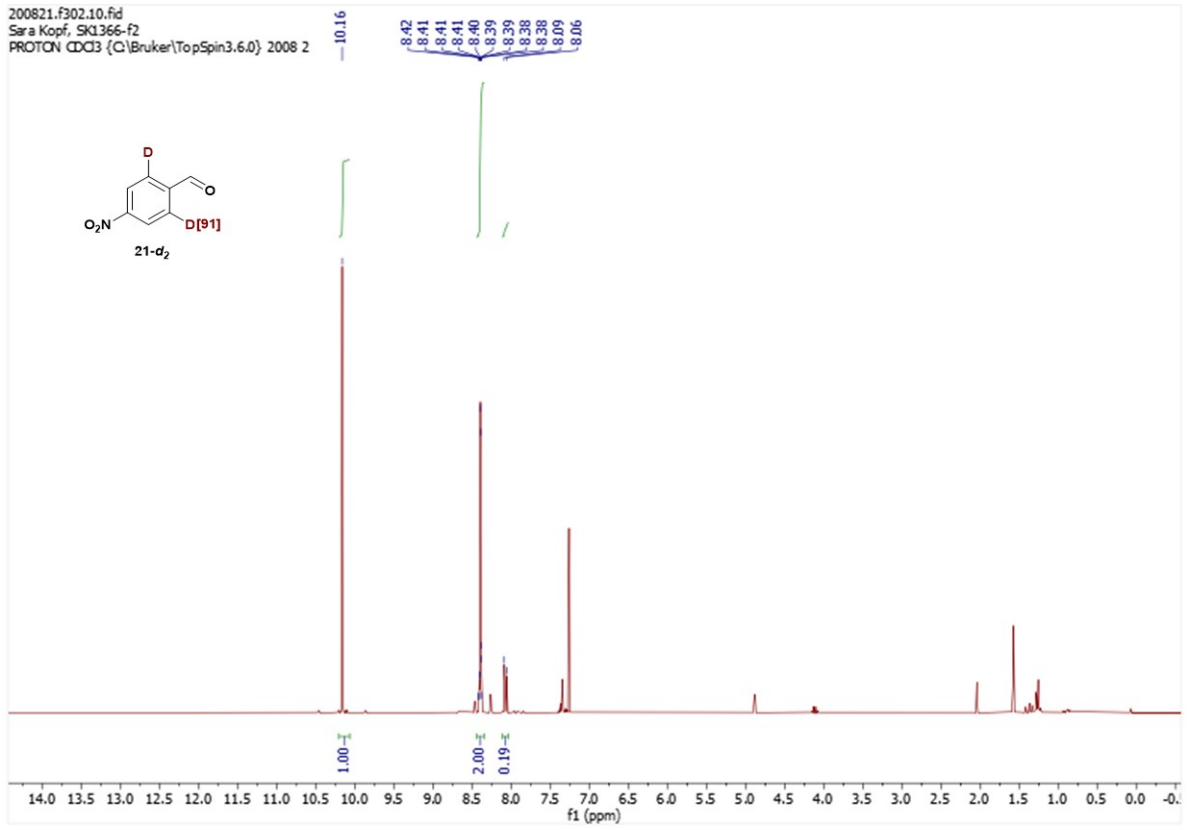

200821.308.10.fid  
Sara Kopf, SK136b-f1  
Au13C CDCl3 (C:\Bruker\TopSpin3.6.0) 2008 8

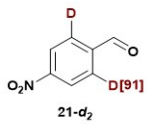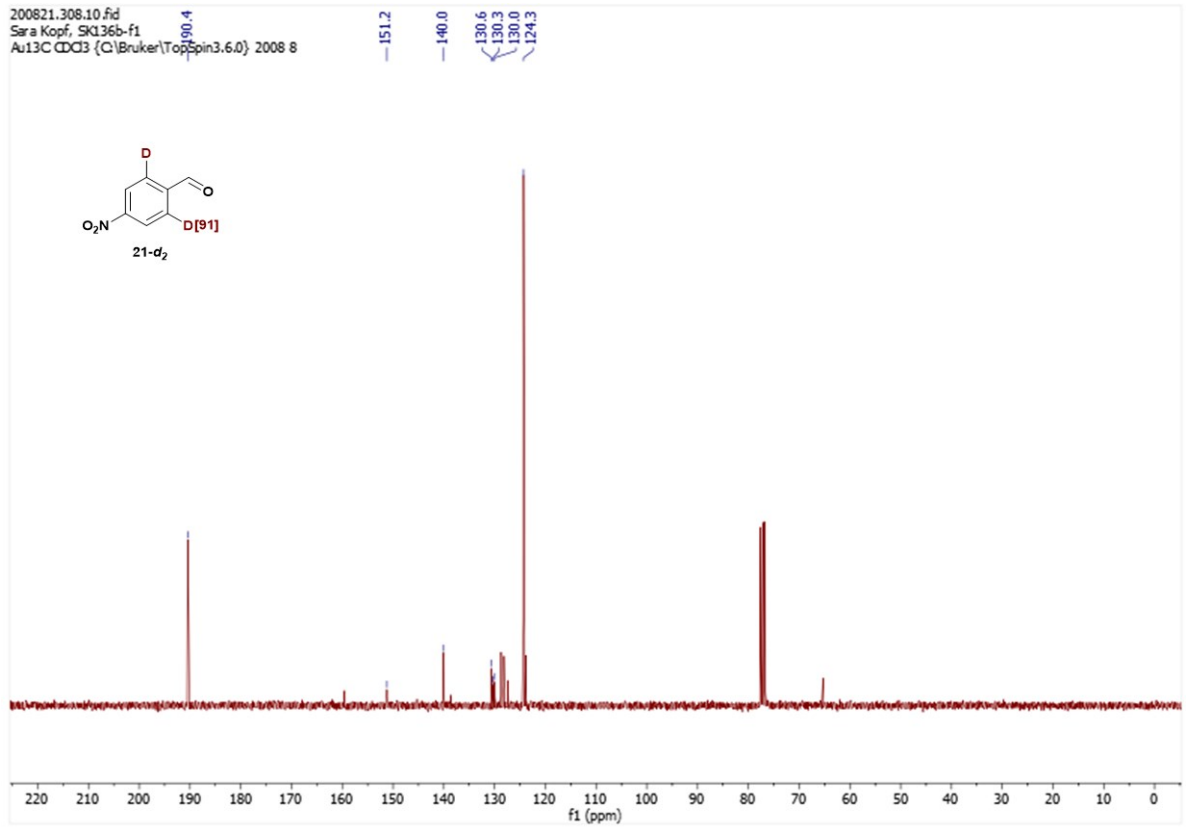

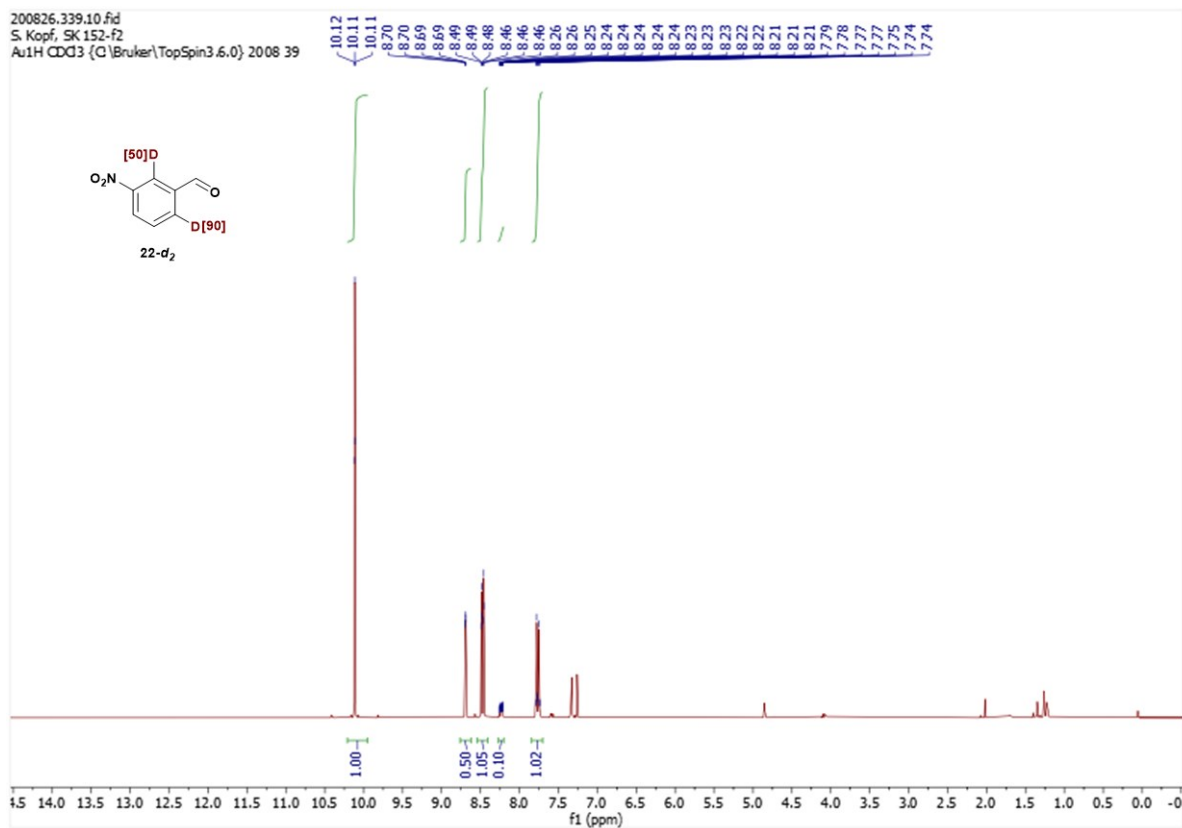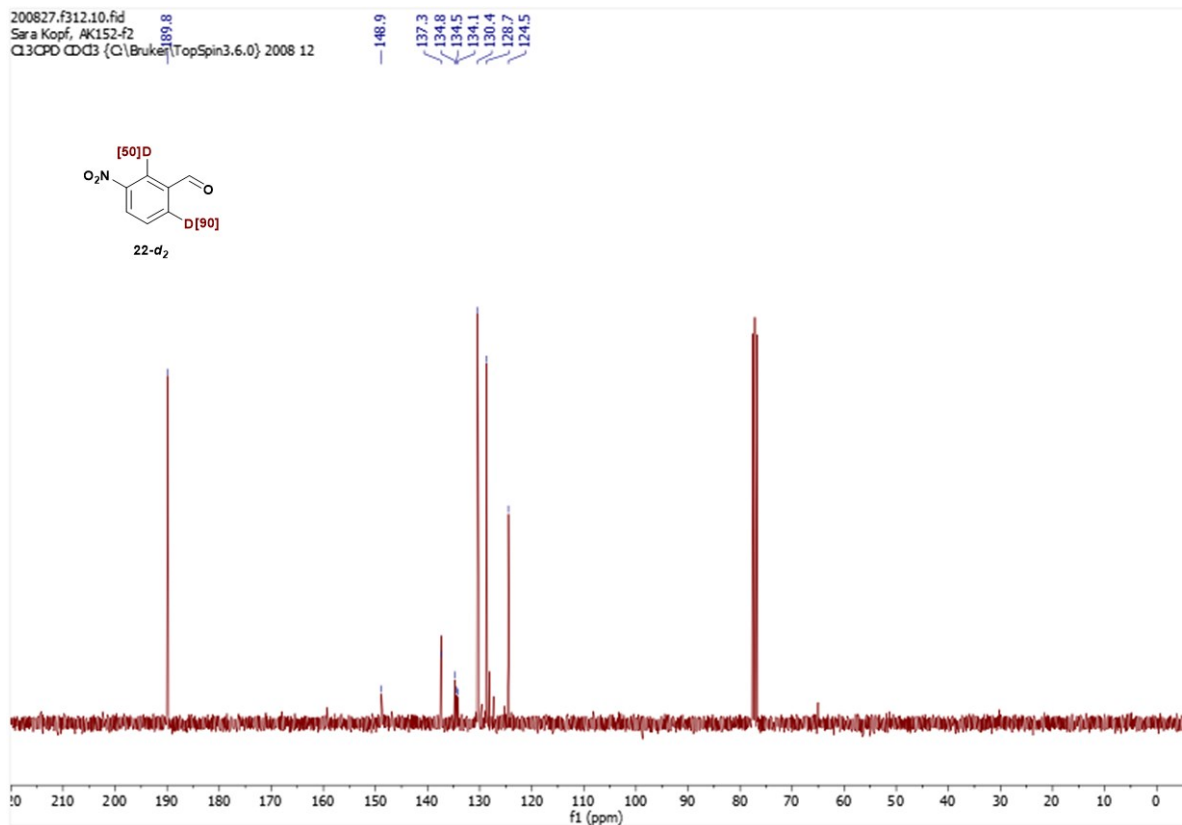

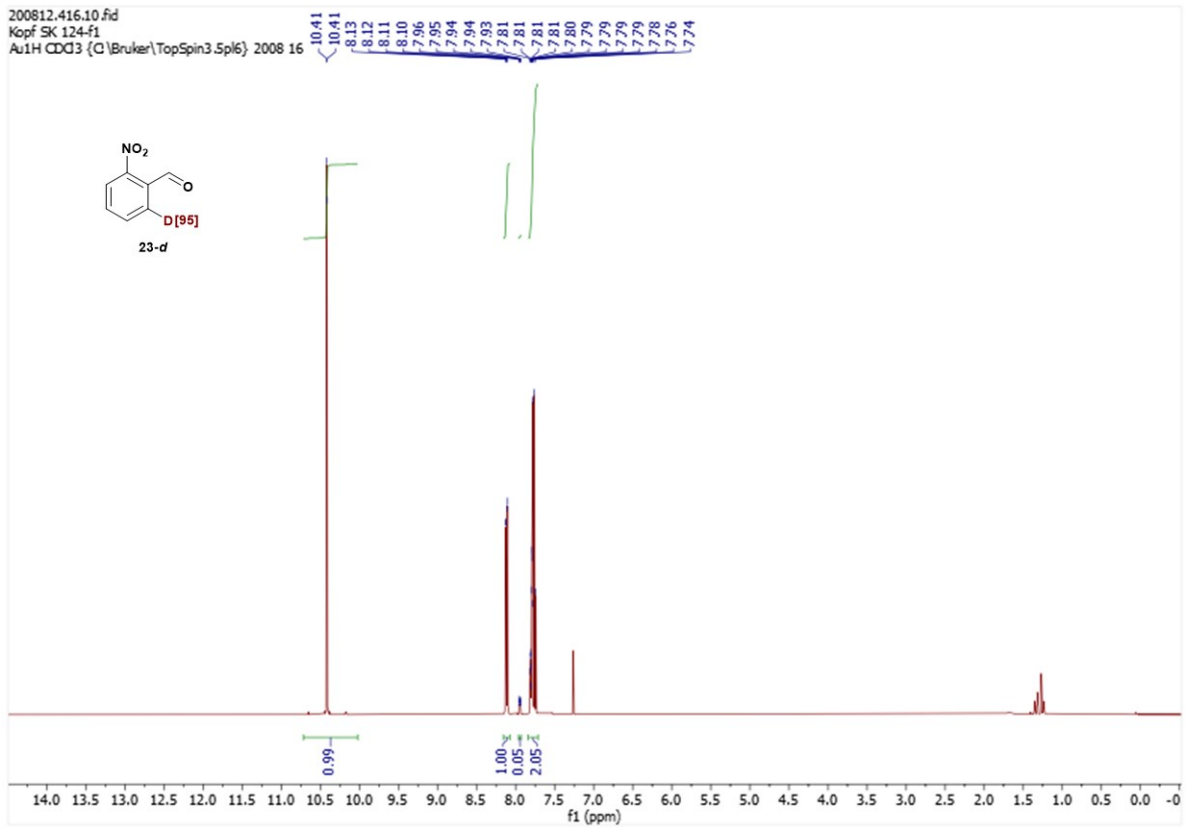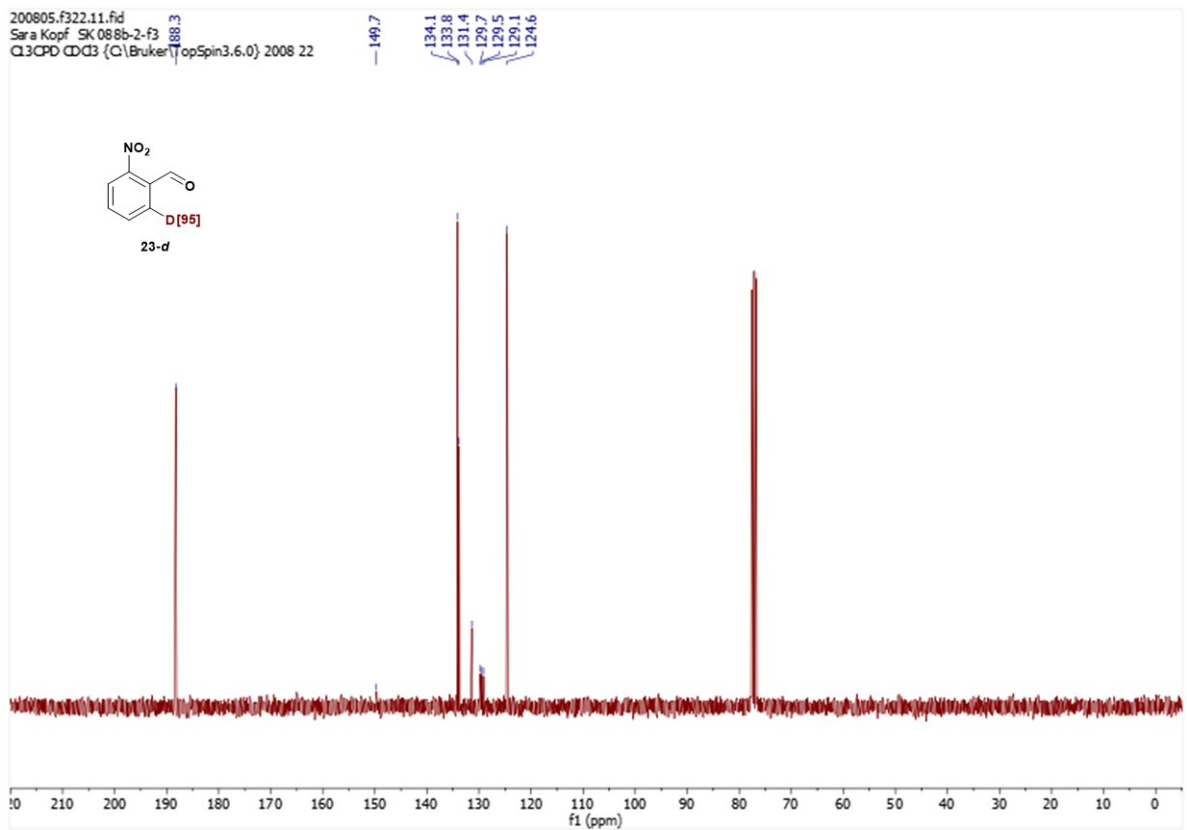



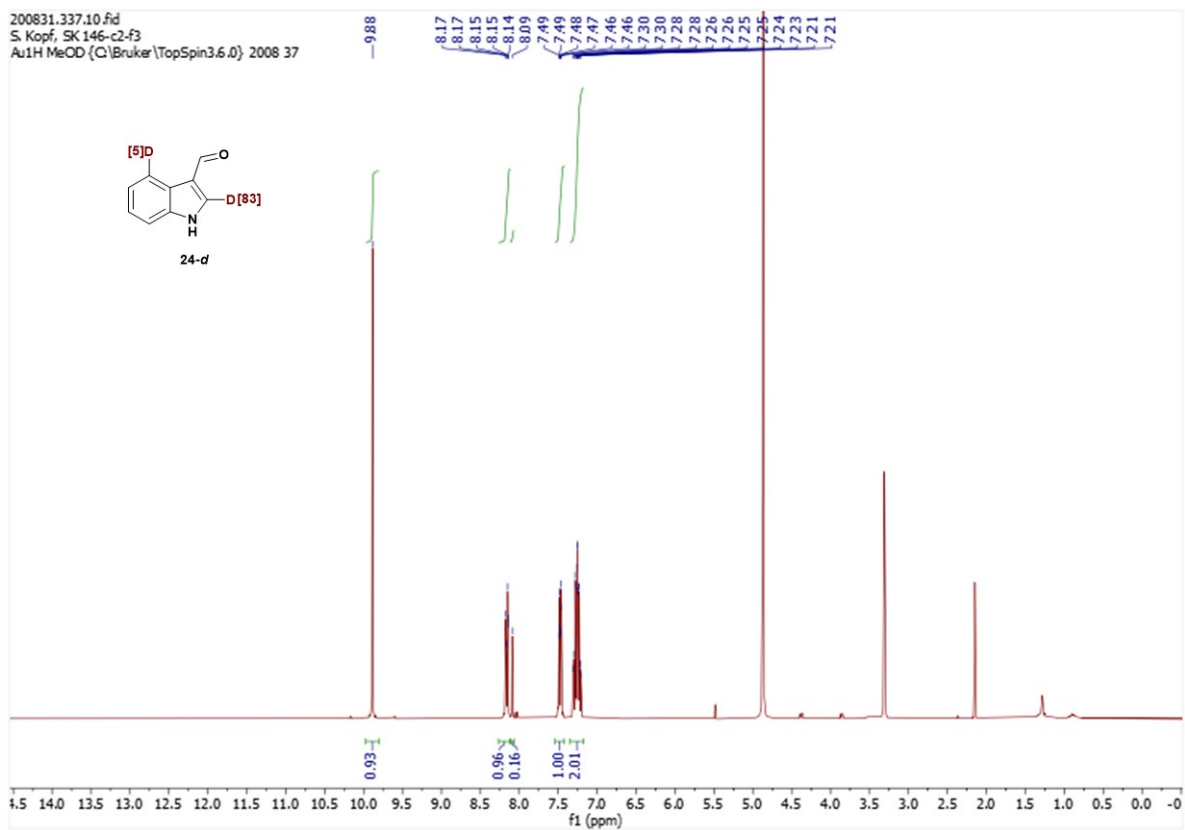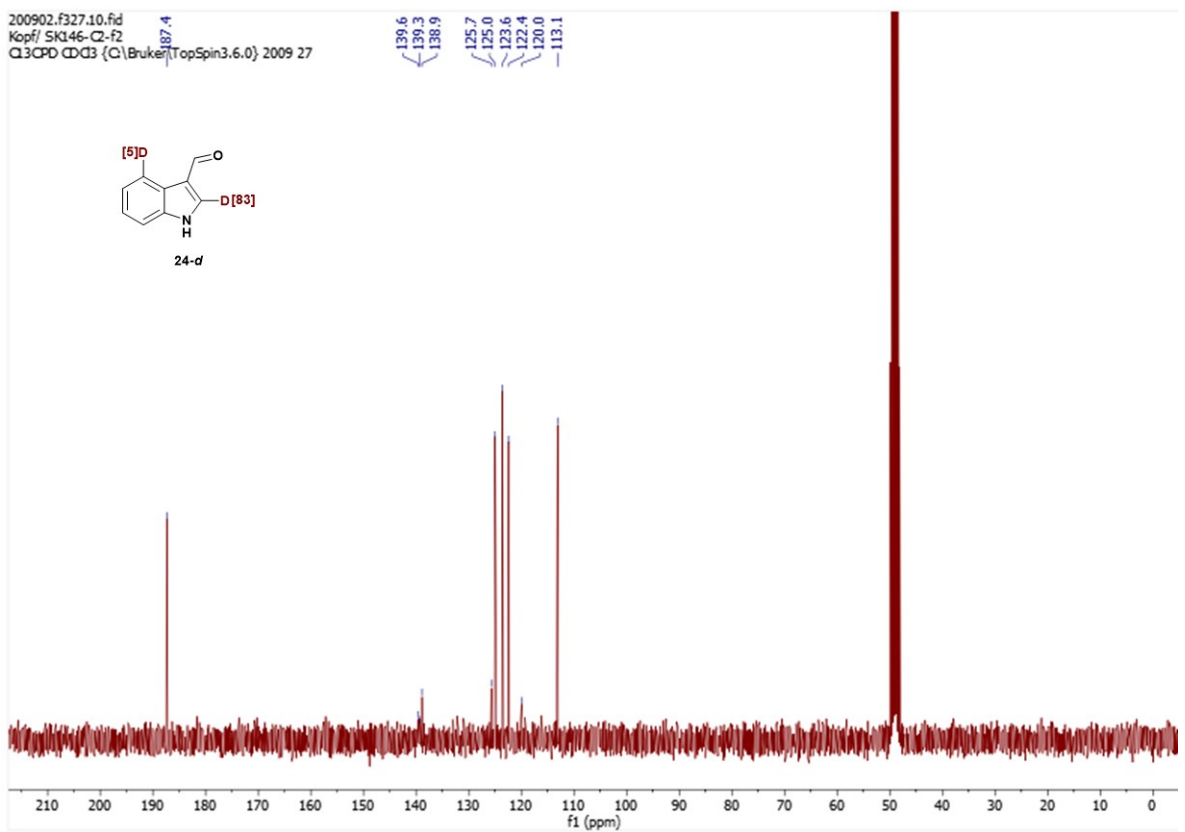

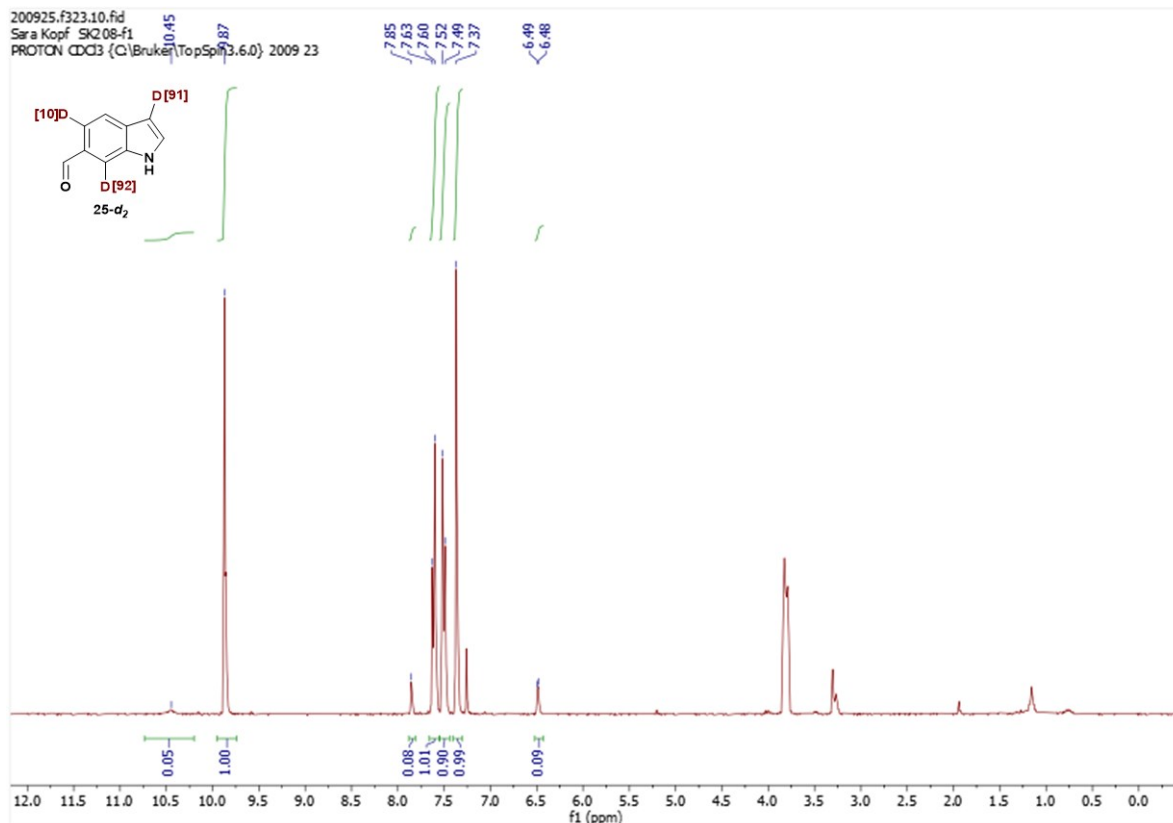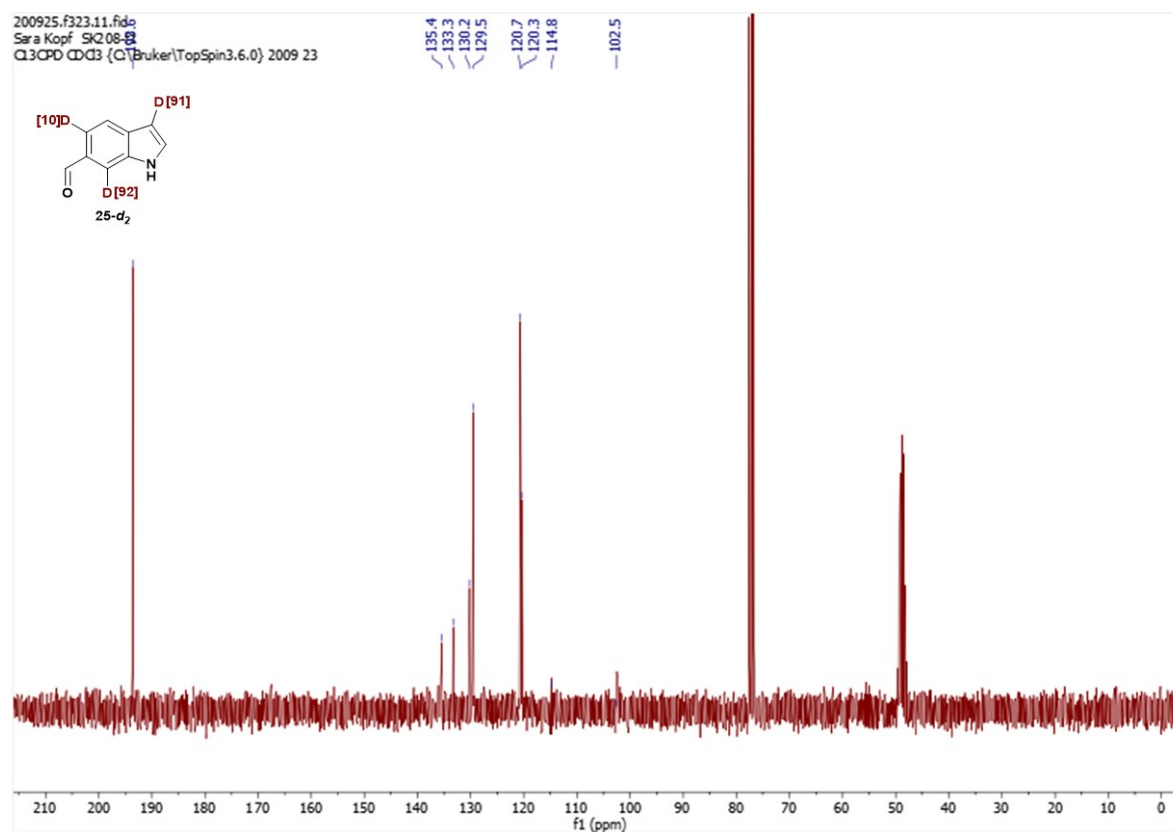

200825.334.10.fid  
S. Kopf, SK 147-columns  
Au1H CDCl3 {C:\Bruker\TopSpin3.6.0} 2008 34

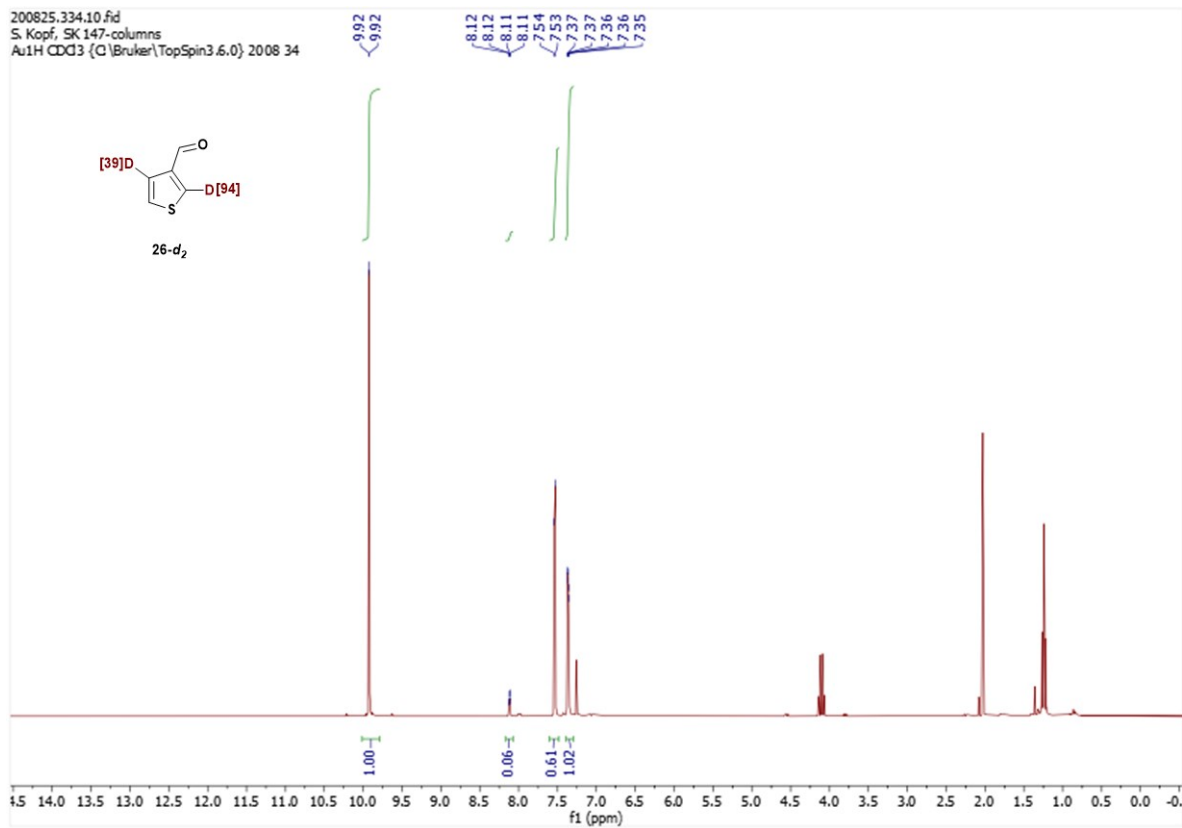

200826.307.10.fid  
Sara Kopf, SK147-column  
Au13C CDCl3 {C:\Bruker\TopSpin3.6.0} 2008 7

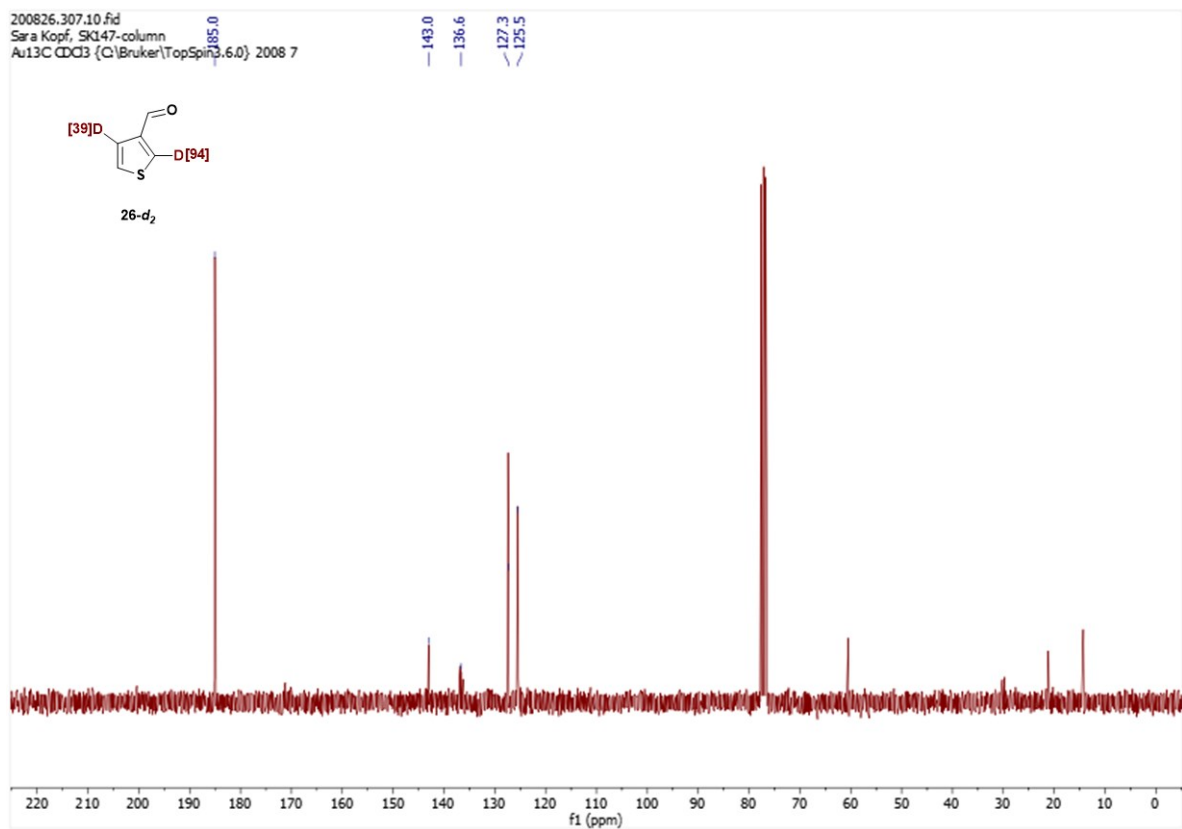

200924.327.10.fid  
Sara Kopf SK2.03-f2  
Au1H CDCl3 (C:\Bruker\TopSpin3.6.0) 2009 27

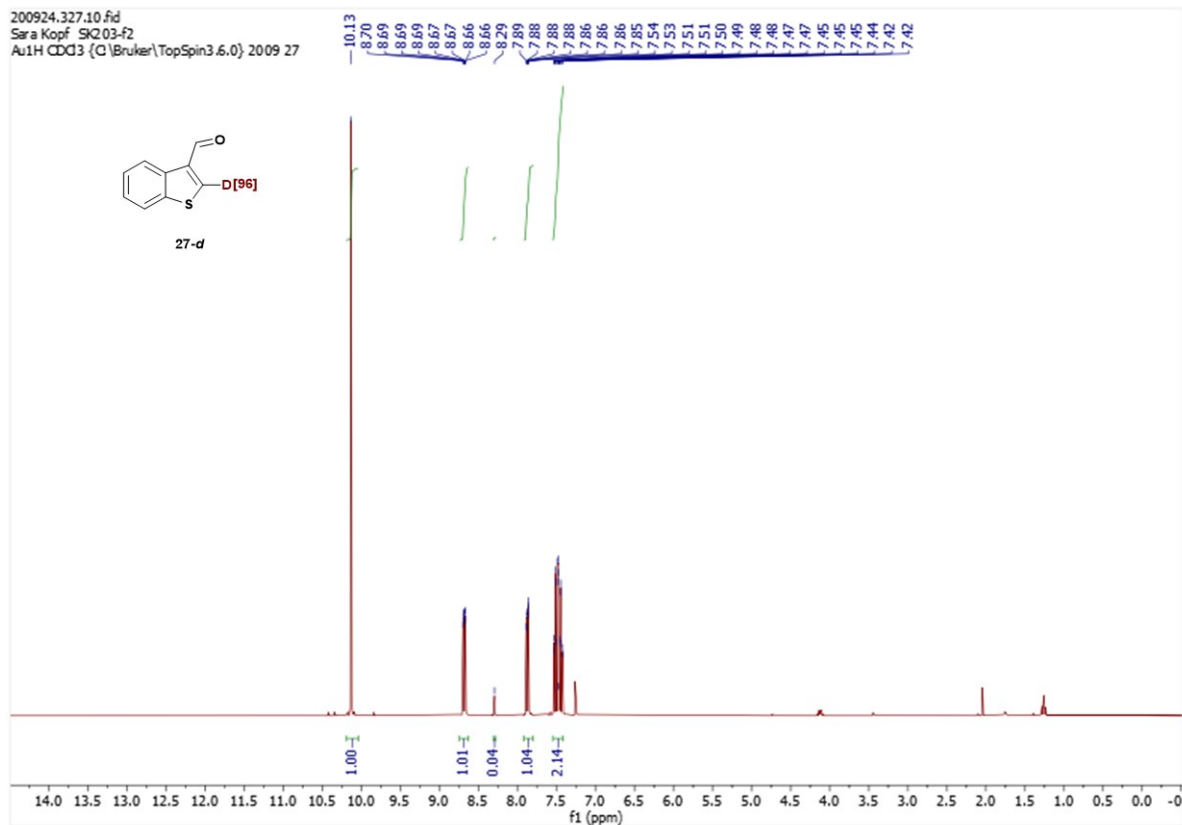

200924.327.11.fid  
Sara Kopf SK2.03-f2  
Au13C CDCl3 (C:\Bruker\TopSpin3.6.0) 2009 27

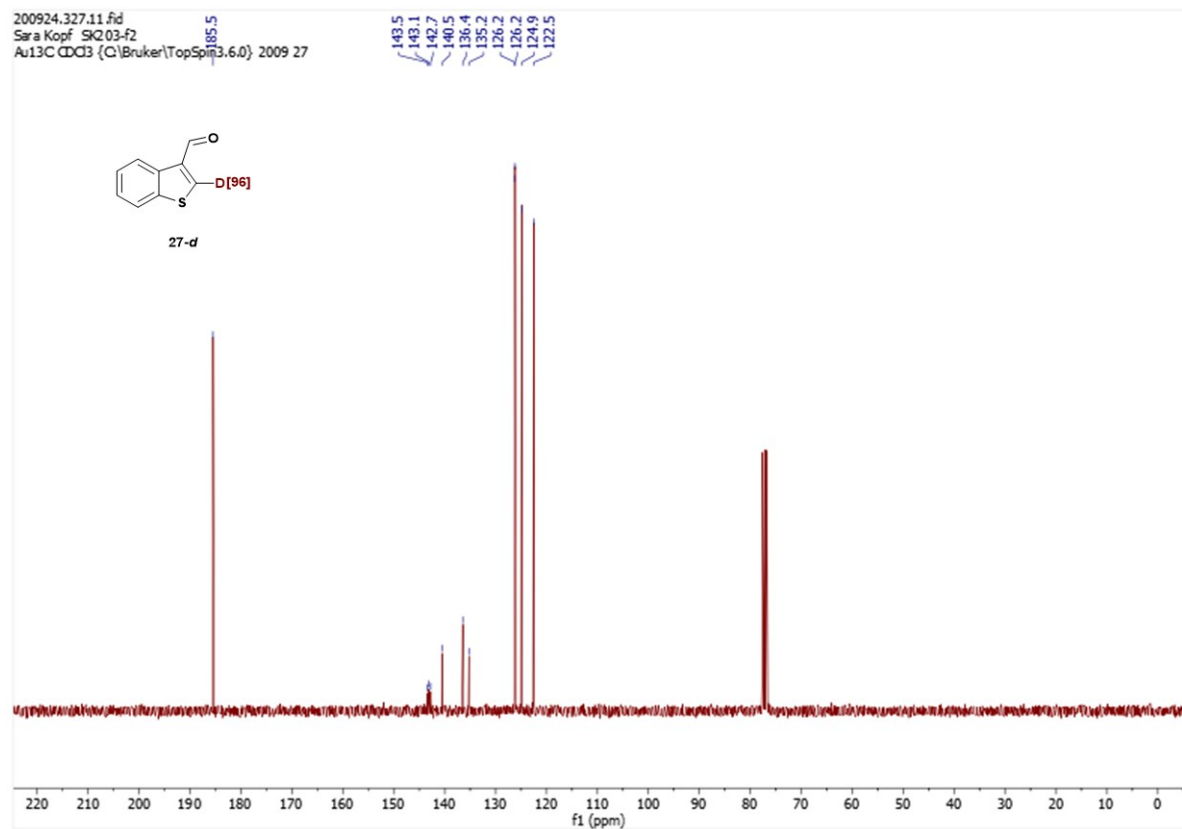

201109.322.10.fid  
Sara Kopf SK192c-f1  
Au1H CDCl3 {C:\Bruker\TopSpin3.6.0} 2011 22

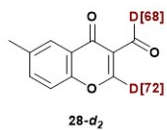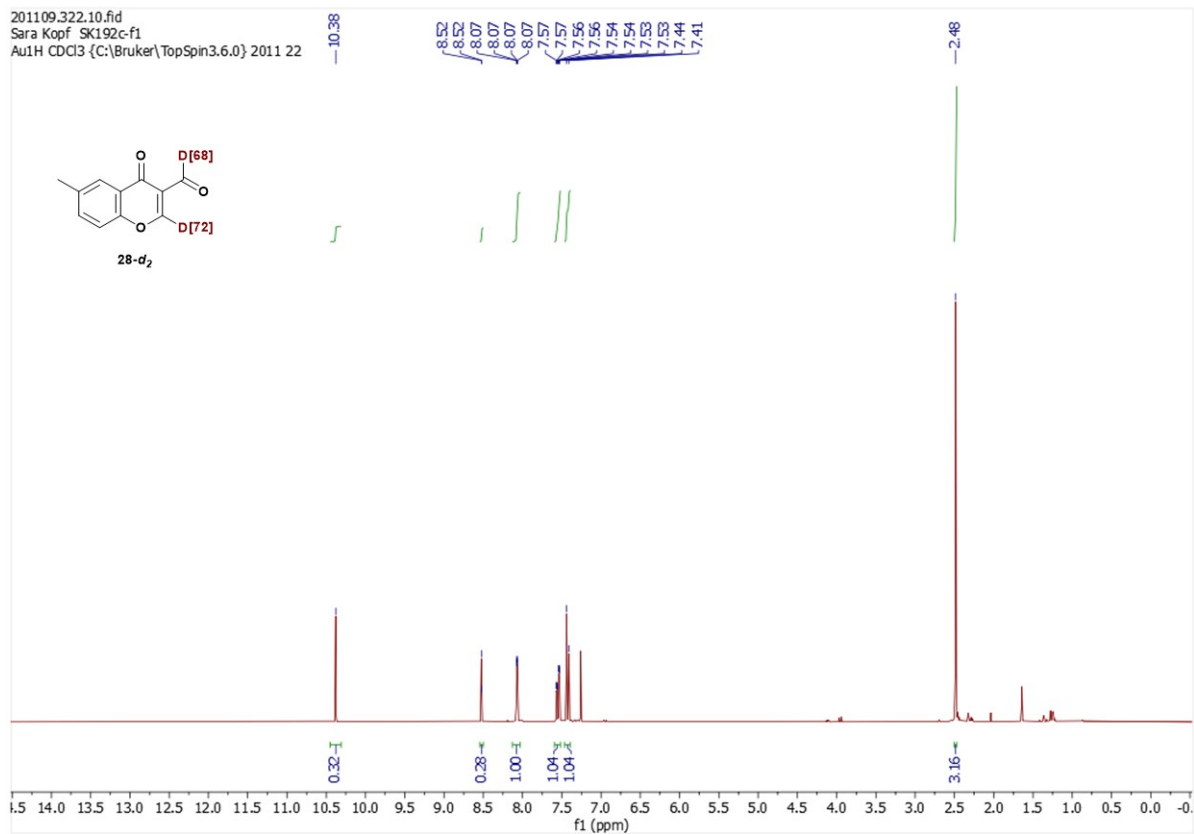

201110.302.10.fid  
Sara Kopf SK192c-f1  
Au13C CDCl3 {C:\Bruker\TopSpin3.6.0} 2011 2

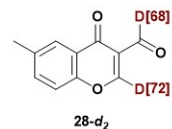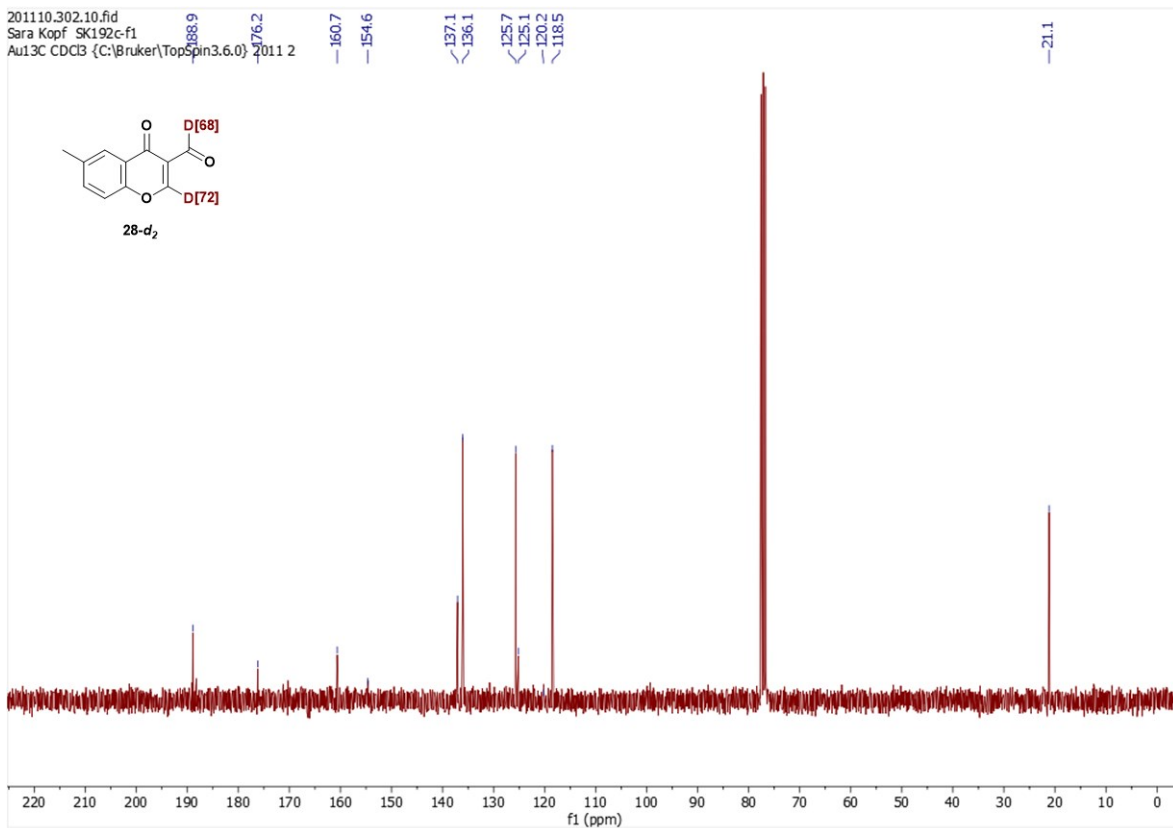

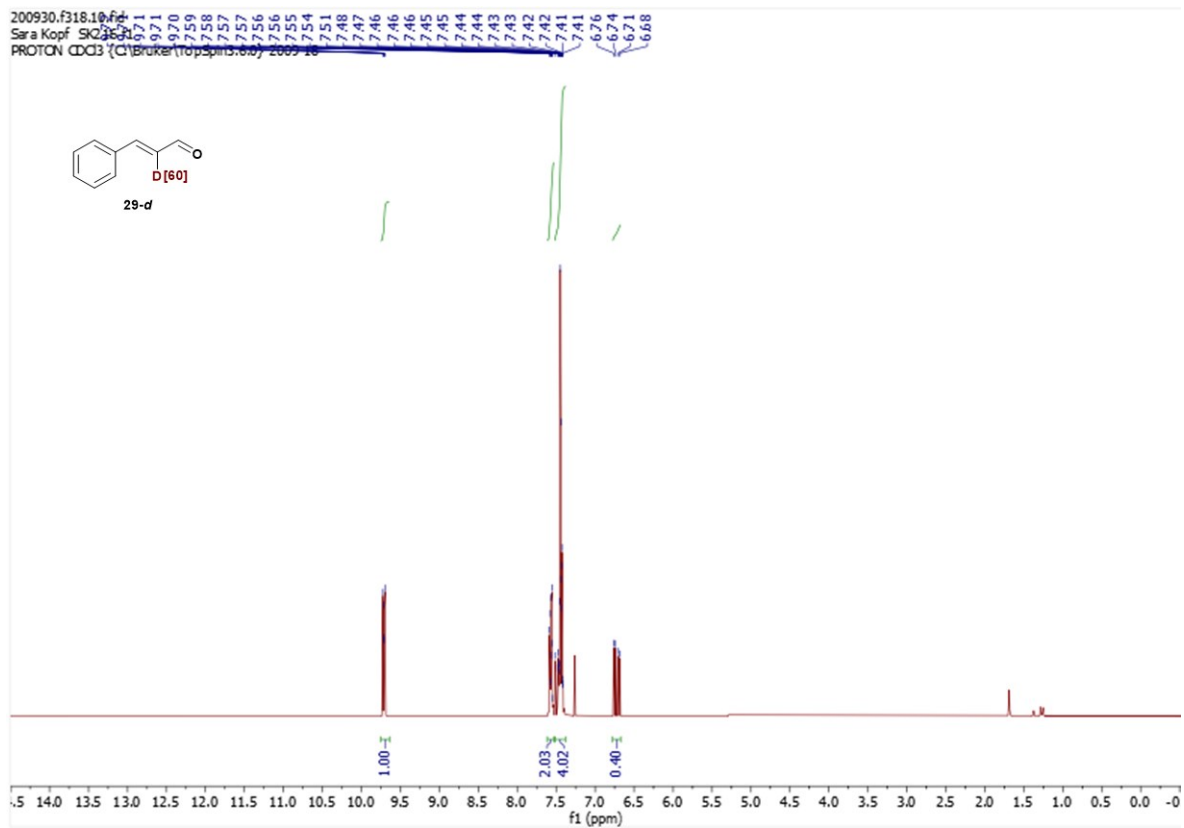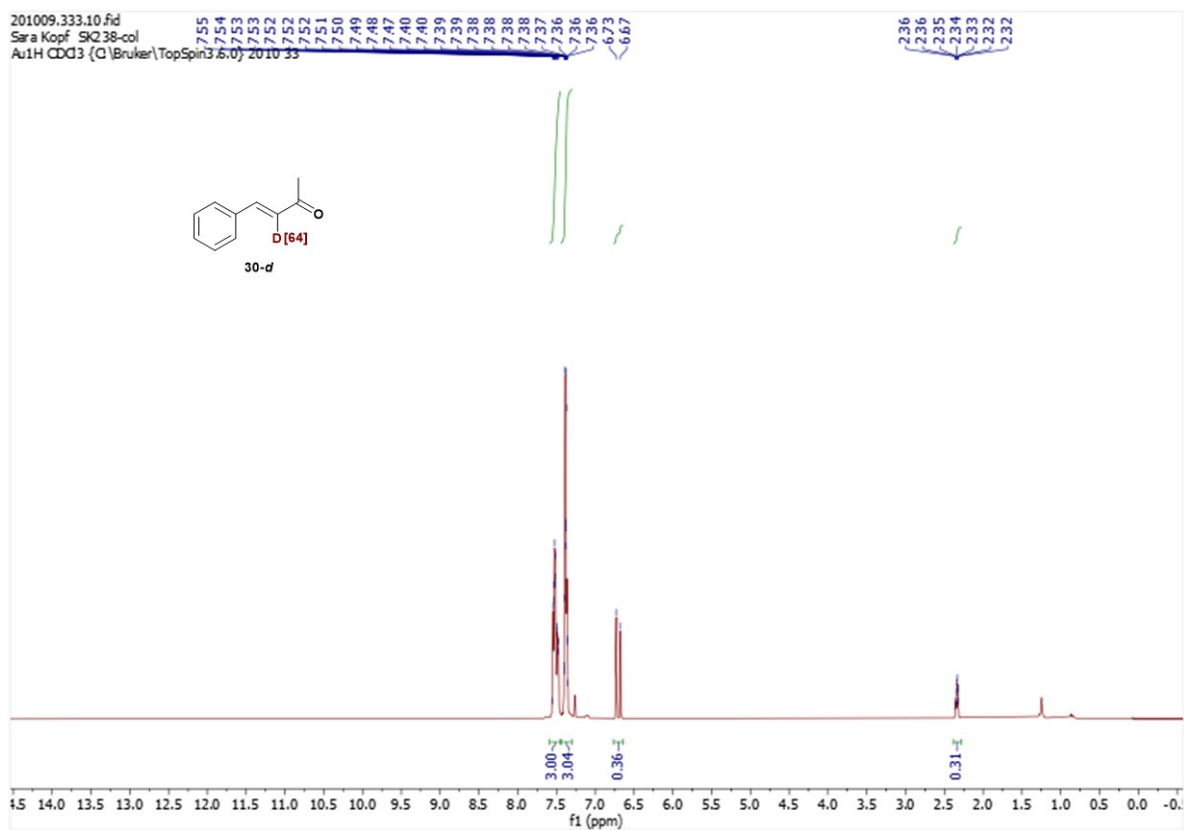

201013.301.10.fid  
 Sara Kopf SK2 38-co  
 Au13C CDCl3 {C:\Bruker\TopSpin3.6.0} 2010 1

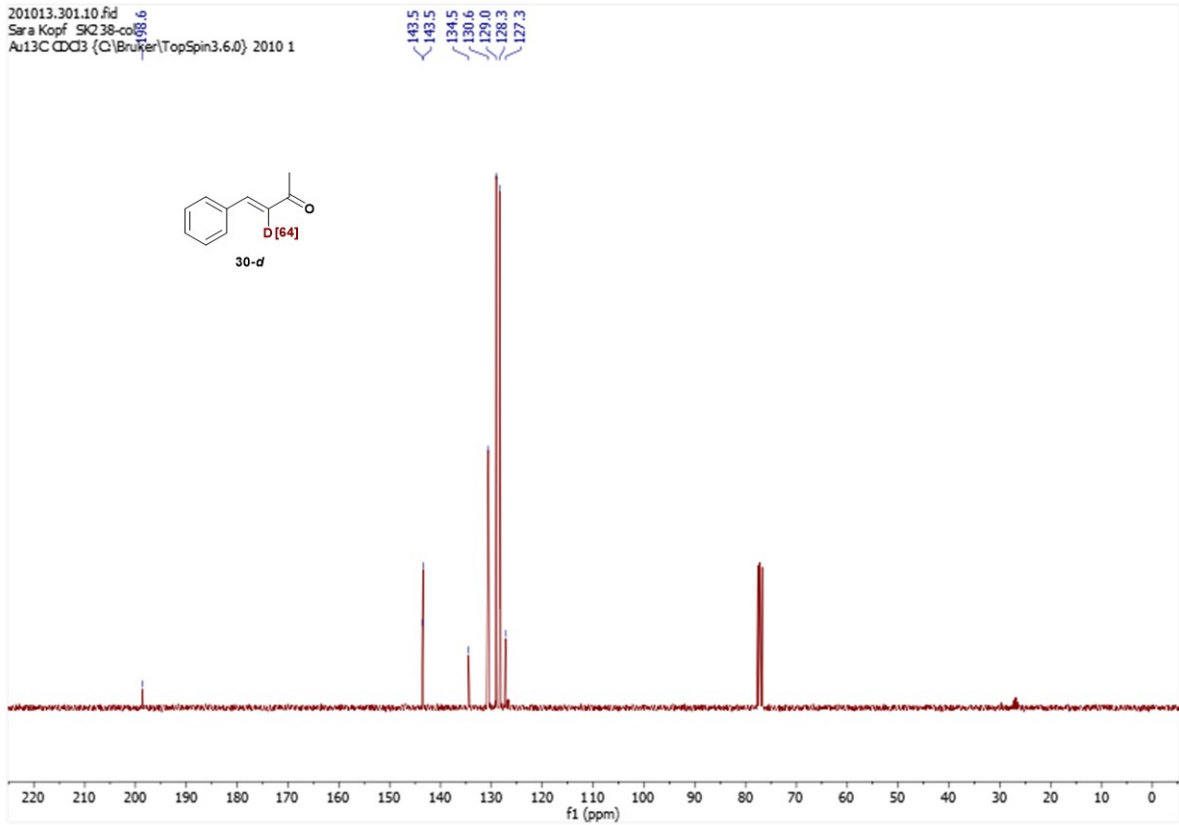

201117.315.10.fid  
 Sara Kopf SK264-col  
 Au1H CDCl3 {C:\Bruker\TopSpin3.6.0} 2011 15

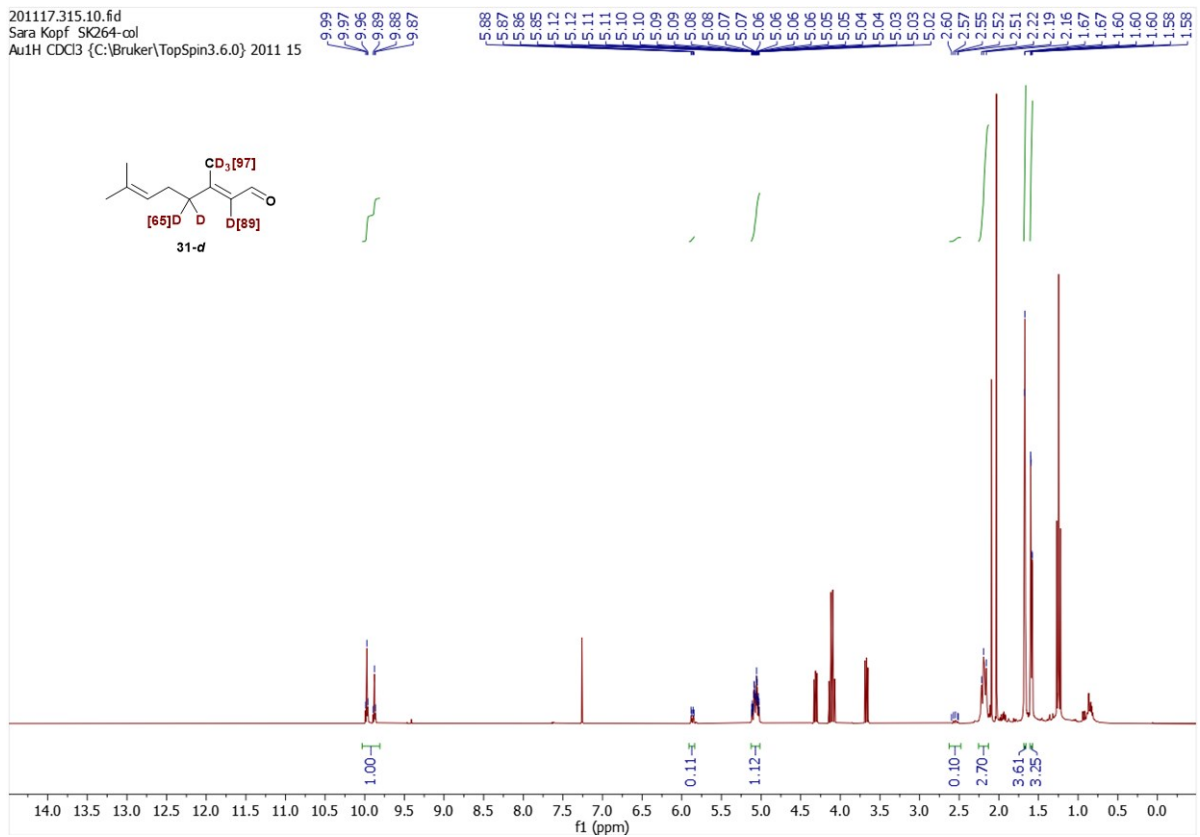

201117.315.11.fid  
Sara Kopf SK264-col  
Au13C CDCl3 {C:\Bruker\TopSpin3.6.0} 2011 15

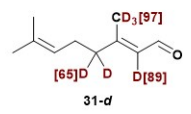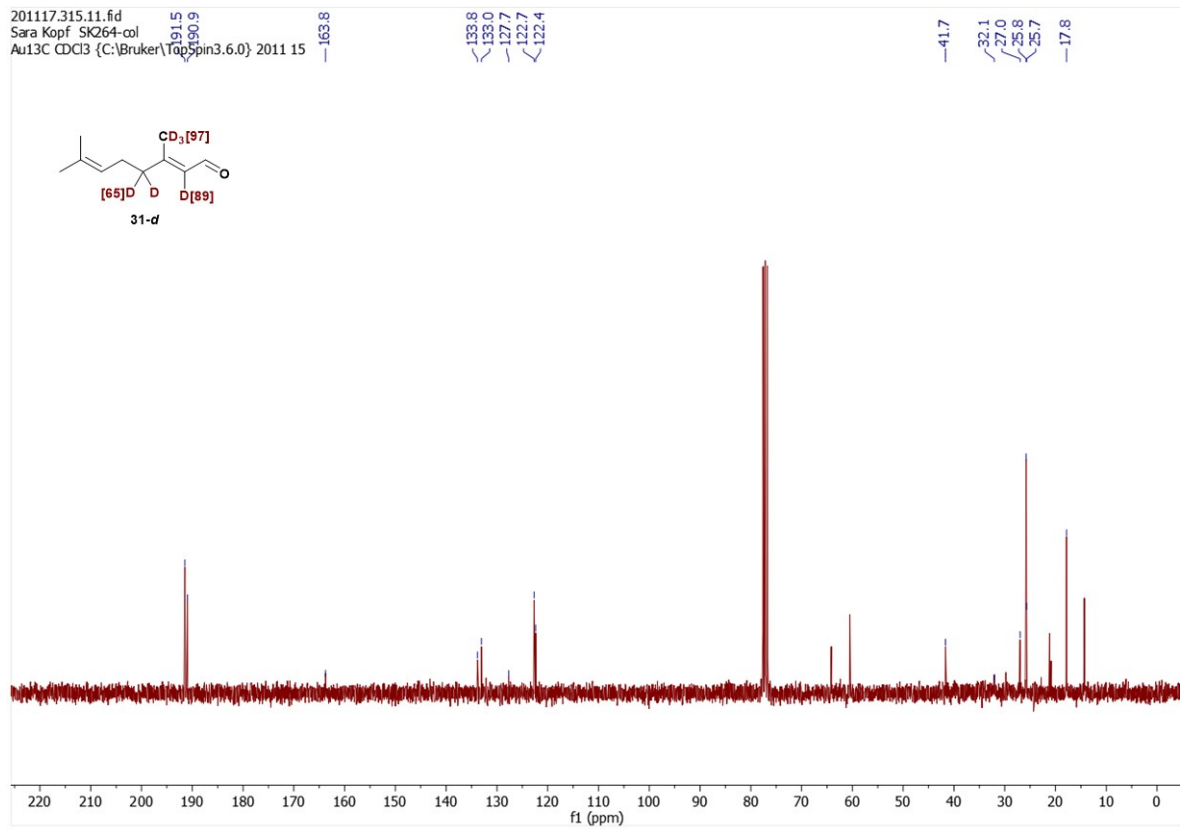



# 9 Mass spectra

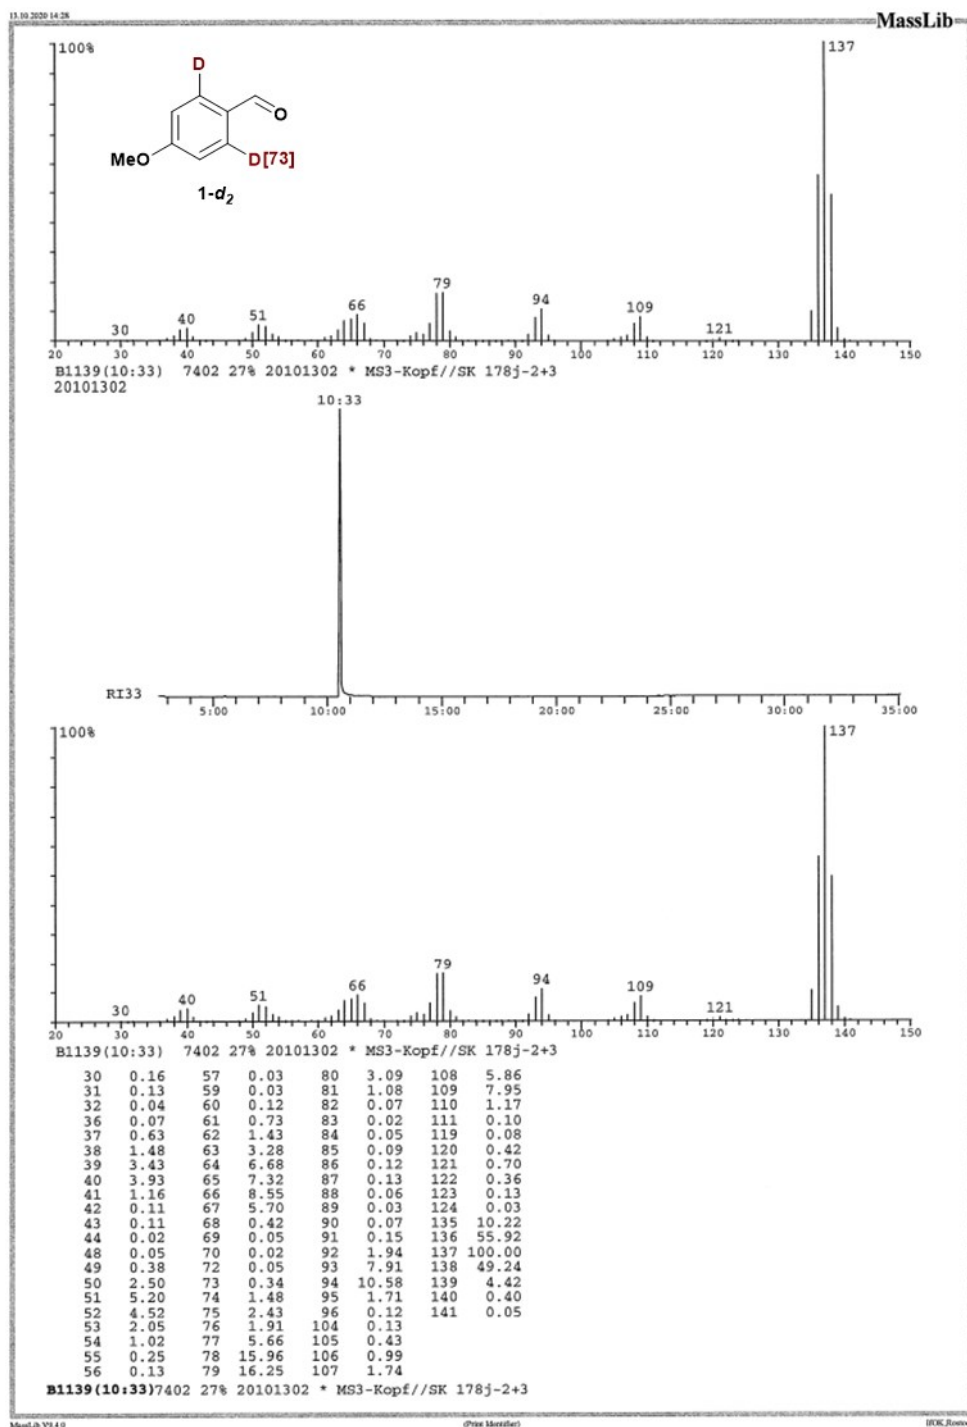

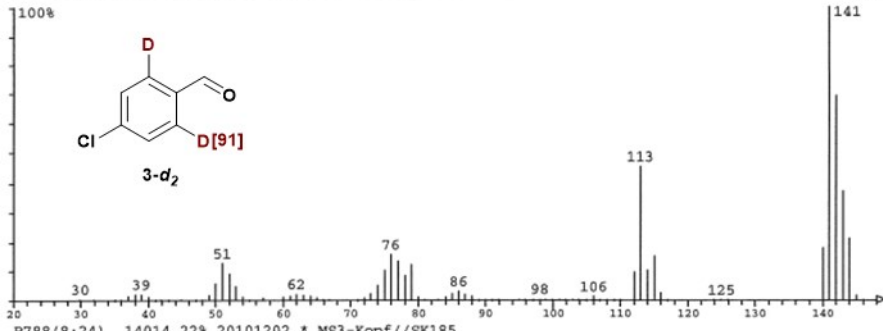

B788 (8:24) 14014 22% 20101202 \* MS3-Kopf//SK185  
20101202

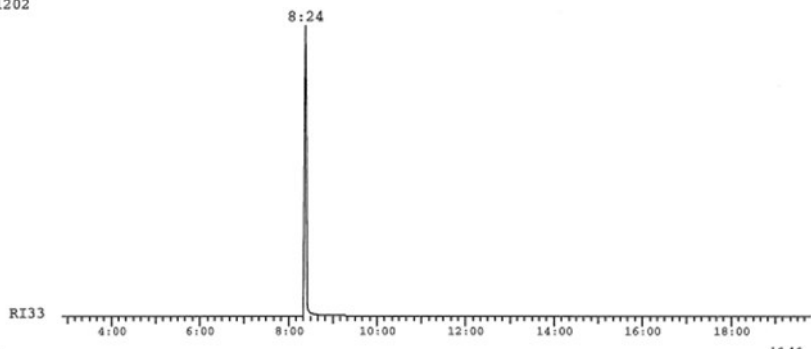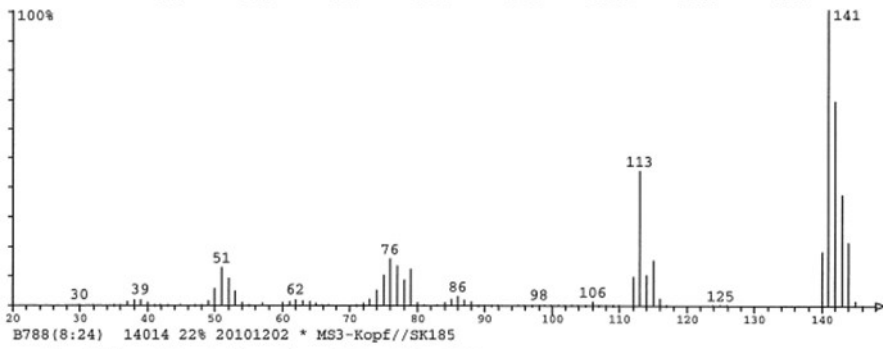

B788 (8:24) 14014 22% 20101202 \* MS3-Kopf//SK185

|    |       |    |       |     |      |     |        |
|----|-------|----|-------|-----|------|-----|--------|
| 30 | 0.07  | 57 | 0.44  | 84  | 0.90 | 107 | 0.16   |
| 32 | 0.00  | 60 | 0.70  | 85  | 1.88 | 108 | 0.11   |
| 35 | 0.32  | 61 | 1.11  | 86  | 2.77 | 109 | 0.13   |
| 36 | 0.34  | 62 | 1.82  | 87  | 1.57 | 110 | 0.14   |
| 37 | 1.08  | 63 | 1.41  | 88  | 1.08 | 112 | 9.57   |
| 38 | 1.71  | 64 | 1.11  | 89  | 0.32 | 113 | 45.18  |
| 39 | 1.80  | 65 | 0.47  | 90  | 0.12 | 114 | 10.05  |
| 40 | 0.88  | 66 | 0.04  | 91  | 0.31 | 115 | 14.93  |
| 41 | 0.34  | 67 | 0.01  | 92  | 0.04 | 116 | 2.36   |
| 42 | 0.04  | 71 | 0.24  | 95  | 0.02 | 117 | 0.13   |
| 43 | 0.22  | 72 | 0.45  | 96  | 0.04 | 124 | 0.03   |
| 45 | 0.04  | 73 | 1.93  | 97  | 0.13 | 125 | 0.04   |
| 47 | 0.23  | 74 | 4.81  | 98  | 0.13 | 126 | 0.02   |
| 48 | 0.28  | 75 | 10.20 | 99  | 0.07 | 140 | 17.88  |
| 49 | 1.35  | 76 | 15.57 | 100 | 0.06 | 141 | 100.00 |
| 50 | 5.51  | 77 | 13.26 | 101 | 0.03 | 142 | 69.08  |
| 51 | 12.71 | 78 | 8.23  | 102 | 0.03 | 143 | 36.94  |
| 52 | 8.98  | 79 | 12.12 | 103 | 0.01 | 144 | 21.09  |
| 53 | 4.57  | 80 | 0.79  | 104 | 0.05 | 145 | 1.50   |
| 54 | 0.70  | 81 | 0.03  | 105 | 0.28 | 146 | 0.09   |
| 55 | 0.08  | 83 | 0.07  | 106 | 0.99 |     |        |

B788 (8:24) 14014 22% 20101202 \* MS3-Kopf//SK185

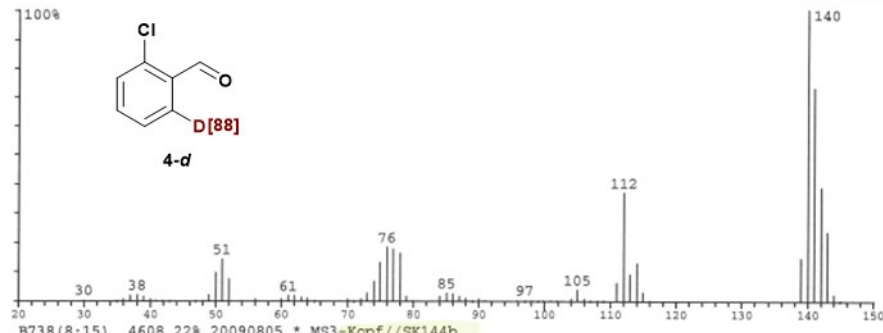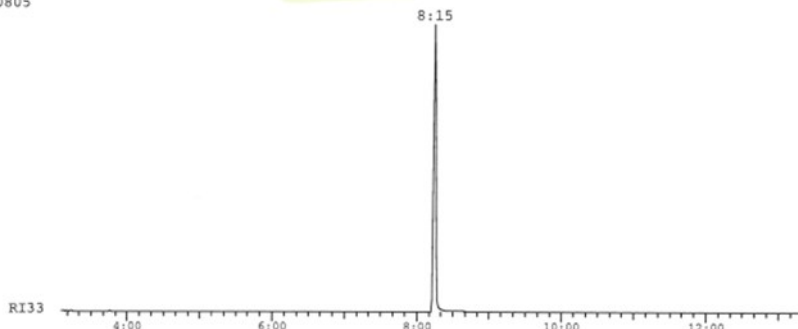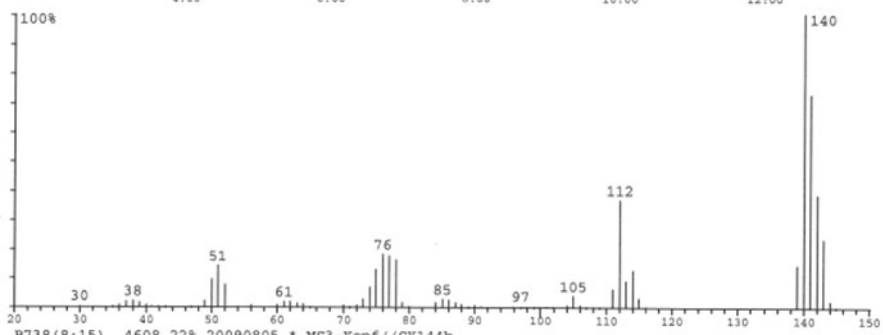

|    |       |    |       |     |       |     |        |
|----|-------|----|-------|-----|-------|-----|--------|
| 30 | 0.10  | 63 | 1.24  | 91  | 0.05  | 140 | 100.00 |
| 35 | 0.30  | 64 | 0.87  | 96  | 0.08  | 141 | 72.85  |
| 36 | 0.48  | 65 | 0.14  | 97  | 0.13  | 142 | 38.59  |
| 37 | 1.57  | 70 | 0.51  | 98  | 0.12  | 143 | 23.51  |
| 38 | 1.93  | 71 | 0.25  | 99  | 0.09  | 144 | 2.04   |
| 39 | 1.42  | 72 | 0.55  | 100 | 0.05  | 145 | 0.15   |
| 40 | 0.64  | 73 | 2.63  | 101 | 0.04  |     |        |
| 41 | 0.06  | 74 | 6.60  | 102 | 0.05  |     |        |
| 42 | 0.06  | 75 | 12.97 | 104 | 0.60  |     |        |
| 43 | 0.19  | 76 | 18.26 | 105 | 3.61  |     |        |
| 47 | 0.21  | 77 | 17.63 | 106 | 0.39  |     |        |
| 48 | 0.33  | 78 | 16.25 | 107 | 0.09  |     |        |
| 49 | 2.02  | 79 | 1.31  | 108 | 0.18  |     |        |
| 50 | 9.45  | 80 | 0.05  | 109 | 0.10  |     |        |
| 51 | 14.20 | 84 | 1.32  | 111 | 6.14  |     |        |
| 52 | 7.38  | 85 | 2.57  | 112 | 36.86 |     |        |
| 54 | 0.22  | 86 | 2.32  | 113 | 8.83  |     |        |
| 56 | 0.43  | 87 | 1.33  | 114 | 12.57 |     |        |
| 60 | 0.61  | 88 | 0.75  | 115 | 2.73  |     |        |
| 61 | 1.76  | 89 | 0.16  | 116 | 0.19  |     |        |
| 62 | 1.60  | 90 | 0.38  | 139 | 14.48 |     |        |

B738 (8:15) 4608 22% 20090805 \* MS3-Kopf//SK144b

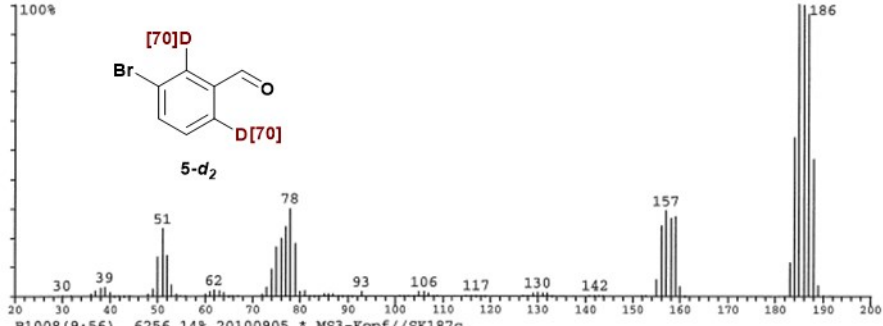

B1008(9:56) 6256 14% 20100905 \* MS3-Kopf//SK187c

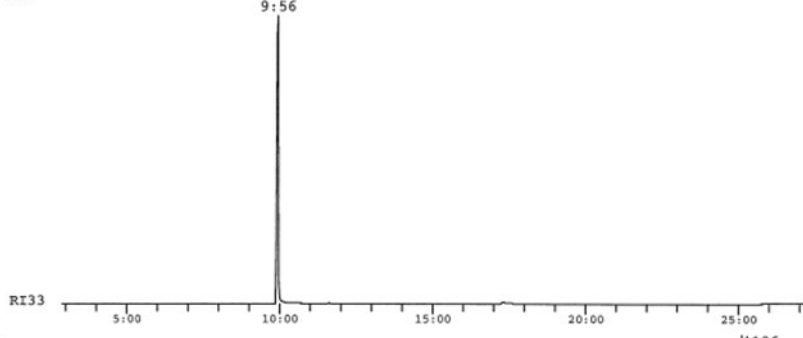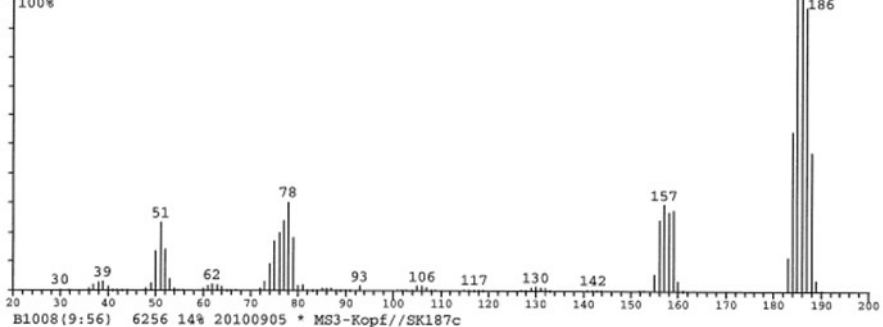

B1008(9:56) 6256 14% 20100905 \* MS3-Kopf//SK187c

|    |       |    |       |     |      |     |       |     |        |
|----|-------|----|-------|-----|------|-----|-------|-----|--------|
| 30 | 0.08  | 61 | 1.42  | 86  | 0.64 | 120 | 0.12  | 183 | 11.37  |
| 32 | 0.02  | 62 | 1.89  | 87  | 0.52 | 127 | 0.03  | 184 | 53.90  |
| 36 | 0.40  | 63 | 1.66  | 88  | 0.33 | 128 | 0.29  | 185 | 100.00 |
| 37 | 1.63  | 64 | 1.10  | 89  | 0.18 | 129 | 0.76  | 186 | 99.87  |
| 38 | 2.67  | 65 | 0.33  | 90  | 0.25 | 130 | 1.02  | 187 | 96.51  |
| 39 | 2.91  | 66 | 0.05  | 91  | 0.33 | 131 | 0.91  | 188 | 46.63  |
| 40 | 1.13  | 67 | 0.05  | 93  | 1.46 | 132 | 0.66  | 189 | 3.42   |
| 41 | 0.22  | 72 | 0.42  | 101 | 0.06 | 133 | 0.16  | 190 | 0.20   |
| 42 | 0.06  | 73 | 2.81  | 102 | 0.05 | 141 | 0.05  |     |        |
| 43 | 0.20  | 74 | 8.91  | 103 | 0.06 | 142 | 0.05  |     |        |
| 44 | 0.24  | 75 | 16.83 | 104 | 0.33 | 143 | 0.05  |     |        |
| 48 | 0.39  | 76 | 19.63 | 105 | 1.27 | 144 | 0.03  |     |        |
| 49 | 2.26  | 77 | 23.84 | 106 | 1.31 | 152 | 0.04  |     |        |
| 50 | 13.20 | 78 | 29.95 | 107 | 0.66 | 153 | 0.04  |     |        |
| 51 | 23.17 | 79 | 18.07 | 108 | 0.30 | 155 | 5.42  |     |        |
| 52 | 13.90 | 80 | 1.42  | 109 | 0.06 | 156 | 23.89 |     |        |
| 53 | 3.65  | 81 | 1.69  | 115 | 0.07 | 157 | 29.33 |     |        |
| 54 | 0.58  | 82 | 0.32  | 116 | 0.19 | 158 | 26.64 |     |        |
| 55 | 0.04  | 83 | 0.08  | 117 | 0.33 | 159 | 27.14 |     |        |
| 56 | 0.03  | 84 | 0.26  | 118 | 0.26 | 160 | 3.02  |     |        |
| 60 | 0.52  | 85 | 0.41  | 119 | 0.23 | 161 | 0.17  |     |        |

B1008(9:56) 6256 14% 20100905 \* MS3-Kopf//SK187c

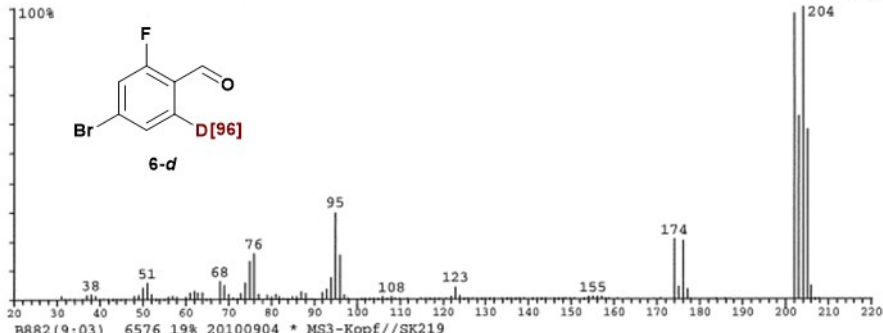

B882 (9:03) 6576 19% 20100904 \* MS3-Kopf//SK219  
20100904

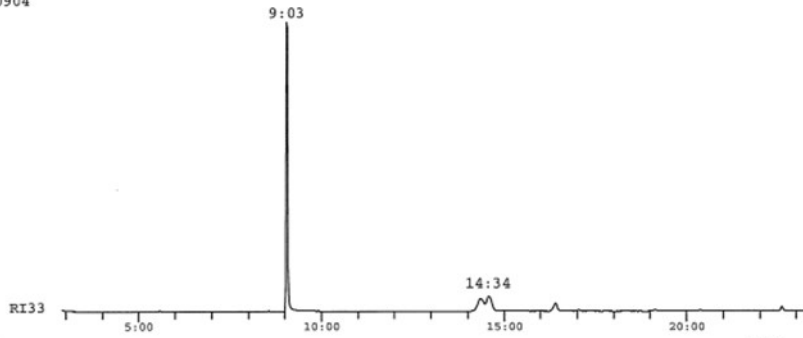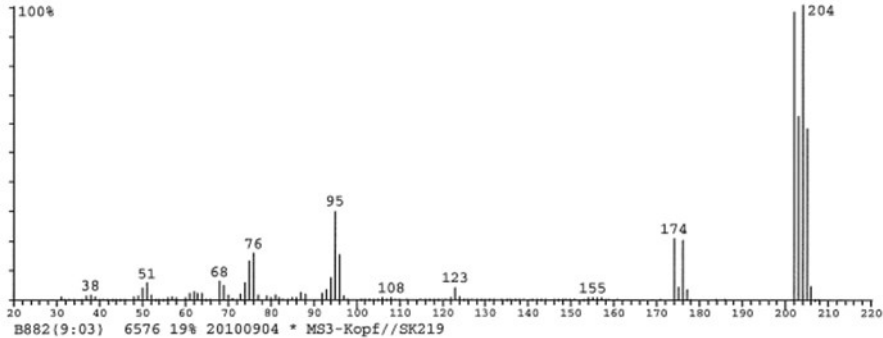

B882 (9:03) 6576 19% 20100904 \* MS3-Kopf//SK219

|    |      |    |       |     |       |     |      |     |      |     |        |     |      |
|----|------|----|-------|-----|-------|-----|------|-----|------|-----|--------|-----|------|
| 31 | 0.82 | 54 | 0.26  | 77  | 1.44  | 104 | 0.22 | 128 | 0.16 | 153 | 0.19   | 207 | 0.26 |
| 32 | 0.03 | 55 | 0.23  | 79  | 1.22  | 105 | 0.21 | 129 | 0.21 | 154 | 0.52   | 208 | 0.03 |
| 33 | 0.03 | 56 | 0.49  | 80  | 0.48  | 106 | 0.39 | 130 | 0.25 | 155 | 0.61   |     |      |
| 34 | 0.06 | 57 | 0.93  | 81  | 1.41  | 107 | 0.15 | 131 | 0.19 | 156 | 0.55   |     |      |
| 36 | 0.28 | 58 | 0.58  | 82  | 0.53  | 108 | 0.45 | 132 | 0.08 | 157 | 0.38   |     |      |
| 37 | 1.09 | 60 | 0.48  | 83  | 0.06  | 109 | 0.05 | 134 | 0.07 | 158 | 0.11   |     |      |
| 38 | 1.24 | 61 | 1.94  | 84  | 0.22  | 110 | 0.03 | 135 | 0.11 | 159 | 0.03   |     |      |
| 39 | 0.77 | 62 | 2.40  | 85  | 0.39  | 112 | 0.04 | 136 | 0.06 | 161 | 0.03   |     |      |
| 40 | 0.32 | 63 | 2.11  | 86  | 0.38  | 115 | 0.06 | 137 | 0.10 | 171 | 0.03   |     |      |
| 41 | 0.02 | 64 | 1.98  | 87  | 2.24  | 116 | 0.10 | 138 | 0.03 | 174 | 20.61  |     |      |
| 42 | 0.03 | 65 | 0.16  | 88  | 1.54  | 117 | 0.19 | 139 | 0.05 | 175 | 3.85   |     |      |
| 43 | 0.15 | 66 | 0.06  | 92  | 1.99  | 118 | 0.18 | 141 | 0.08 | 176 | 19.87  |     |      |
| 44 | 0.12 | 68 | 6.08  | 93  | 3.13  | 119 | 0.15 | 142 | 0.11 | 177 | 2.99   |     |      |
| 45 | 0.15 | 69 | 4.49  | 94  | 7.16  | 120 | 0.08 | 143 | 0.10 | 178 | 0.14   |     |      |
| 46 | 0.13 | 70 | 1.46  | 95  | 29.67 | 121 | 0.07 | 144 | 0.10 | 184 | 0.05   |     |      |
| 48 | 0.78 | 71 | 0.37  | 96  | 15.07 | 122 | 0.64 | 146 | 0.10 | 186 | 0.04   |     |      |
| 49 | 1.04 | 72 | 0.32  | 97  | 1.07  | 123 | 3.84 | 147 | 0.09 | 202 | 97.68  |     |      |
| 50 | 3.76 | 73 | 1.73  | 98  | 0.04  | 124 | 0.68 | 148 | 0.11 | 203 | 61.99  |     |      |
| 51 | 5.48 | 74 | 5.54  | 101 | 0.34  | 125 | 0.12 | 149 | 0.07 | 204 | 100.00 |     |      |
| 52 | 1.26 | 75 | 13.10 | 102 | 0.32  | 126 | 0.03 | 150 | 0.06 | 205 | 57.55  |     |      |
| 53 | 0.13 | 76 | 15.60 | 103 | 0.10  | 127 | 0.02 | 151 | 0.04 | 206 | 4.43   |     |      |

B882 (9:03) 6576 19% 20100904 \* MS3-Kopf//SK219

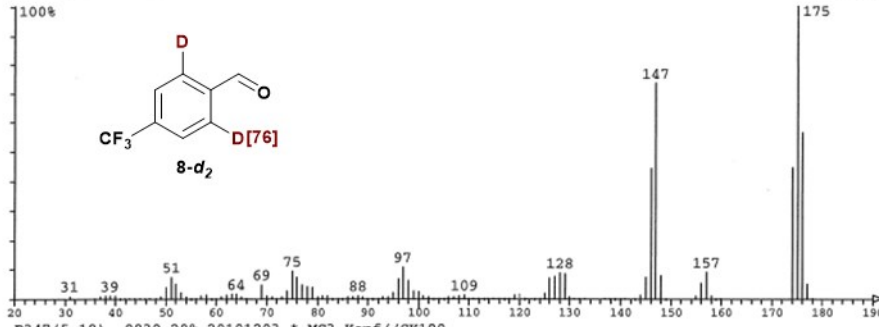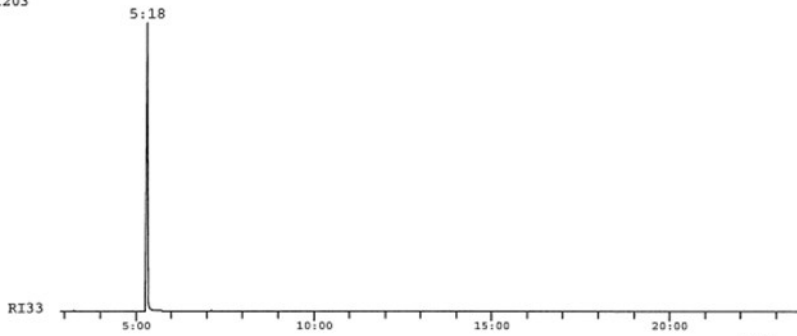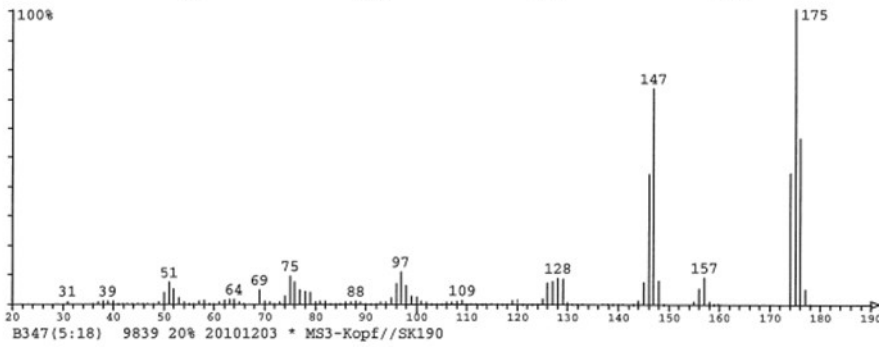

|    |      |    |      |    |       |     |      |     |       |     |        |
|----|------|----|------|----|-------|-----|------|-----|-------|-----|--------|
| 31 | 0.63 | 56 | 0.24 | 79 | 3.56  | 100 | 2.17 | 121 | 0.29  | 147 | 73.21  |
| 36 | 0.08 | 57 | 0.85 | 80 | 0.53  | 101 | 0.90 | 123 | 0.28  | 148 | 7.75   |
| 37 | 0.44 | 58 | 1.13 | 81 | 0.73  | 102 | 0.52 | 124 | 0.35  | 149 | 0.35   |
| 38 | 0.80 | 59 | 0.22 | 82 | 0.81  | 103 | 0.23 | 125 | 1.69  | 155 | 0.70   |
| 39 | 0.89 | 60 | 0.15 | 83 | 0.21  | 104 | 0.17 | 126 | 6.81  | 156 | 5.02   |
| 40 | 0.71 | 61 | 0.60 | 84 | 0.18  | 105 | 0.26 | 127 | 7.59  | 157 | 8.79   |
| 41 | 0.30 | 62 | 1.04 | 85 | 0.32  | 106 | 0.43 | 128 | 8.71  | 158 | 0.76   |
| 42 | 0.02 | 63 | 1.31 | 86 | 0.44  | 107 | 0.51 | 129 | 8.29  | 159 | 0.11   |
| 43 | 0.06 | 64 | 1.40 | 87 | 0.56  | 108 | 0.87 | 130 | 0.63  | 160 | 0.06   |
| 44 | 0.04 | 65 | 0.40 | 88 | 0.67  | 109 | 1.14 | 131 | 0.05  | 174 | 44.41  |
| 45 | 0.03 | 66 | 0.06 | 89 | 0.49  | 110 | 0.16 | 132 | 0.02  | 175 | 100.00 |
| 46 | 0.03 | 69 | 4.46 | 90 | 0.17  | 111 | 0.05 | 133 | 0.04  | 176 | 56.19  |
| 47 | 0.02 | 70 | 0.69 | 91 | 0.13  | 112 | 0.08 | 137 | 0.02  | 177 | 4.83   |
| 48 | 0.10 | 71 | 0.51 | 92 | 0.17  | 113 | 0.11 | 138 | 0.08  | 178 | 0.28   |
| 49 | 0.53 | 72 | 0.21 | 93 | 0.56  | 114 | 0.05 | 139 | 0.10  |     |        |
| 50 | 3.77 | 73 | 0.60 | 94 | 0.40  | 115 | 0.07 | 140 | 0.08  |     |        |
| 51 | 7.22 | 74 | 2.51 | 95 | 1.97  | 116 | 0.12 | 141 | 0.02  |     |        |
| 52 | 4.83 | 75 | 9.14 | 96 | 6.52  | 117 | 0.10 | 143 | 0.26  |     |        |
| 53 | 1.86 | 76 | 7.33 | 97 | 10.55 | 118 | 0.17 | 144 | 1.05  |     |        |
| 54 | 0.40 | 77 | 4.69 | 98 | 6.13  | 119 | 0.96 | 145 | 7.28  |     |        |
| 55 | 0.09 | 78 | 3.99 | 99 | 2.40  | 120 | 1.36 | 146 | 44.12 |     |        |

B347(5:18)9839 20% 20101203 \* MS3-Kopf//SK190

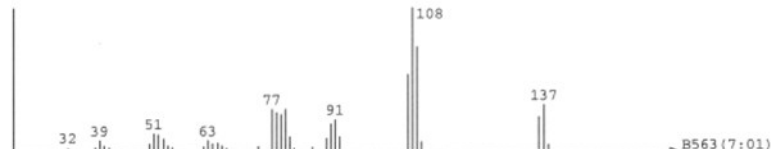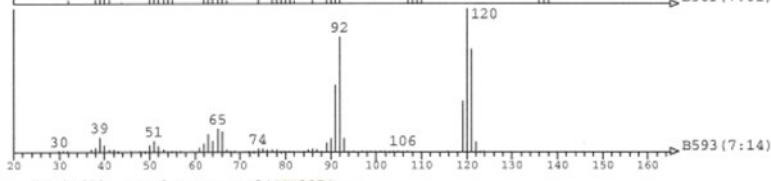

20101602 \* MS3-Sara Kopf//SK205C  
20101602

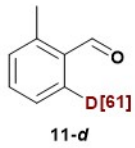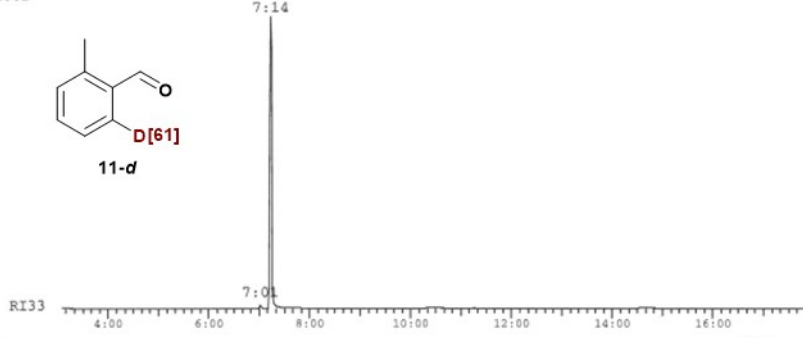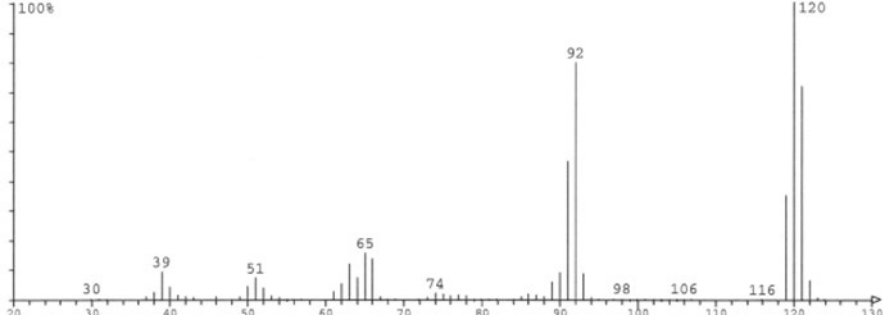

B593 (7:14) 9505 21% 20101602 \* MS3-Sara Kopf//SK205C

|    |      |    |       |     |       |     |        |
|----|------|----|-------|-----|-------|-----|--------|
| 30 | 0.06 | 61 | 2.42  | 85  | 0.84  | 107 | 0.02   |
| 31 | 0.06 | 62 | 5.29  | 86  | 1.57  | 116 | 0.02   |
| 32 | 0.00 | 63 | 11.91 | 87  | 1.28  | 119 | 35.02  |
| 37 | 0.93 | 64 | 7.29  | 88  | 0.71  | 120 | 100.00 |
| 38 | 2.14 | 65 | 15.59 | 89  | 5.60  | 121 | 71.66  |
| 39 | 9.20 | 66 | 13.52 | 90  | 9.02  | 122 | 6.21   |
| 40 | 3.94 | 67 | 0.93  | 91  | 46.22 | 123 | 0.48   |
| 41 | 1.32 | 68 | 0.08  | 92  | 79.77 | 124 | 0.03   |
| 42 | 0.81 | 69 | 0.02  | 93  | 8.60  |     |        |
| 43 | 0.51 | 72 | 0.04  | 94  | 0.45  |     |        |
| 46 | 0.68 | 73 | 0.46  | 95  | 0.02  |     |        |
| 48 | 0.09 | 74 | 1.84  | 97  | 0.05  |     |        |
| 49 | 0.69 | 75 | 1.78  | 98  | 0.16  |     |        |
| 50 | 4.26 | 76 | 1.08  | 99  | 0.09  |     |        |
| 51 | 7.16 | 77 | 1.34  | 100 | 0.02  |     |        |
| 52 | 3.58 | 78 | 1.13  | 101 | 0.05  |     |        |
| 53 | 1.23 | 79 | 0.26  | 102 | 0.14  |     |        |
| 54 | 0.42 | 80 | 0.05  | 103 | 0.17  |     |        |
| 55 | 0.11 | 81 | 0.02  | 104 | 0.12  |     |        |
| 56 | 0.05 | 82 | 0.02  | 105 | 0.13  |     |        |
| 57 | 0.02 | 84 | 0.30  | 106 | 0.17  |     |        |

B593 (7:14) 9505 21% 20101602 \* MS3-Sara Kopf//SK205C

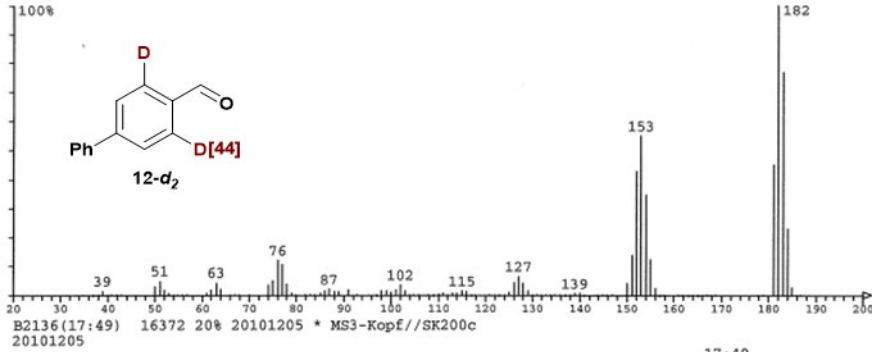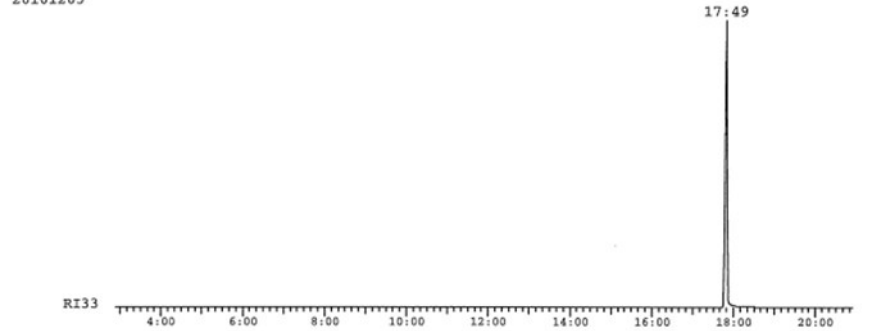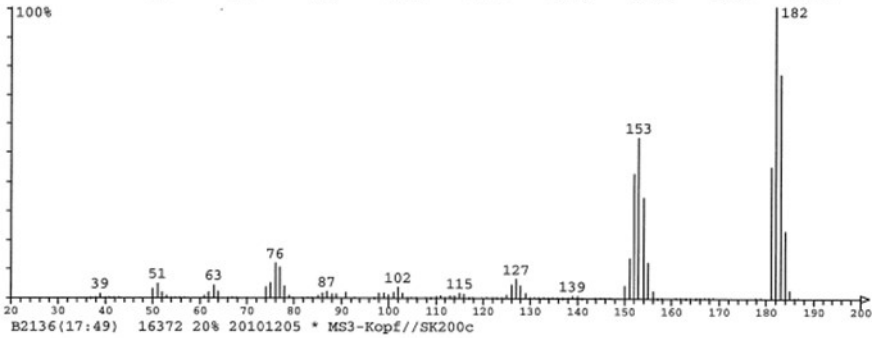

|    |      |    |       |     |      |     |      |     |       |     |        |
|----|------|----|-------|-----|------|-----|------|-----|-------|-----|--------|
| 37 | 0.15 | 68 | 0.02  | 99  | 1.31 | 122 | 0.33 | 145 | 0.01  | 178 | 0.01   |
| 38 | 0.33 | 70 | 0.08  | 100 | 0.75 | 123 | 0.20 | 146 | 0.04  | 179 | 0.07   |
| 39 | 1.23 | 74 | 3.47  | 101 | 1.64 | 124 | 0.15 | 147 | 0.02  | 181 | 44.87  |
| 40 | 0.32 | 75 | 4.90  | 102 | 3.37 | 125 | 0.70 | 150 | 3.91  | 182 | 100.00 |
| 41 | 0.07 | 76 | 11.70 | 103 | 1.31 | 126 | 4.41 | 151 | 13.46 | 183 | 76.65  |
| 42 | 0.01 | 77 | 10.43 | 104 | 0.33 | 127 | 6.33 | 152 | 42.48 | 184 | 22.71  |
| 43 | 0.01 | 78 | 3.72  | 105 | 0.07 | 128 | 4.03 | 153 | 54.80 | 185 | 2.59   |
| 50 | 2.75 | 79 | 0.46  | 106 | 0.04 | 129 | 1.32 | 154 | 34.32 | 186 | 0.19   |
| 51 | 4.71 | 80 | 0.08  | 108 | 0.01 | 130 | 0.22 | 155 | 12.15 | 187 | 0.01   |
| 52 | 1.80 | 82 | 0.06  | 109 | 0.15 | 131 | 0.03 | 156 | 2.23  |     |        |
| 53 | 0.43 | 83 | 0.05  | 110 | 0.36 | 132 | 0.01 | 157 | 0.21  |     |        |
| 54 | 0.10 | 84 | 0.06  | 111 | 0.39 | 133 | 0.02 | 158 | 0.01  |     |        |
| 55 | 0.05 | 85 | 0.38  | 112 | 0.19 | 134 | 0.04 | 161 | 0.01  |     |        |
| 56 | 0.02 | 86 | 1.24  | 113 | 0.65 | 135 | 0.03 | 162 | 0.04  |     |        |
| 57 | 0.02 | 87 | 1.90  | 114 | 0.57 | 136 | 0.01 | 163 | 0.13  |     |        |
| 61 | 0.54 | 88 | 1.00  | 115 | 1.43 | 137 | 0.10 | 164 | 0.16  |     |        |
| 62 | 1.62 | 89 | 1.23  | 116 | 0.97 | 138 | 0.13 | 165 | 0.16  |     |        |
| 63 | 4.13 | 91 | 1.54  | 117 | 0.22 | 139 | 0.52 | 166 | 0.14  |     |        |
| 64 | 2.08 | 93 | 0.02  | 118 | 0.02 | 140 | 0.42 | 167 | 0.05  |     |        |
| 66 | 0.20 | 97 | 0.18  | 120 | 0.05 | 141 | 0.10 | 168 | 0.02  |     |        |
| 67 | 0.06 | 98 | 1.40  | 121 | 0.08 | 144 | 0.01 | 169 | 0.01  |     |        |

B2136(17:49)16372 20% 20101205 \* MS3-Kopf//SK200c



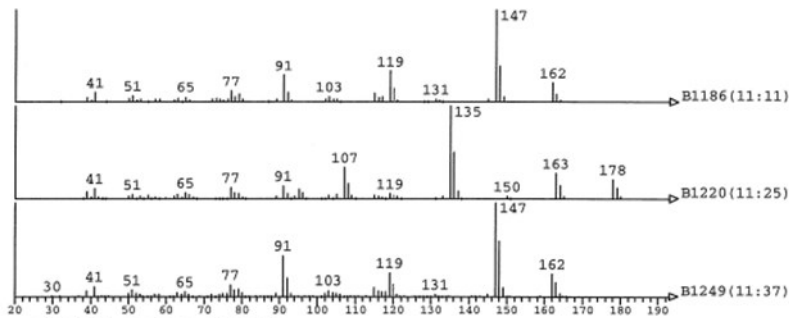

\*1

20101204 \* MS3-Kopf//SK148c  
20101204

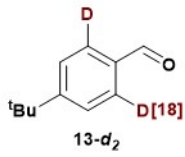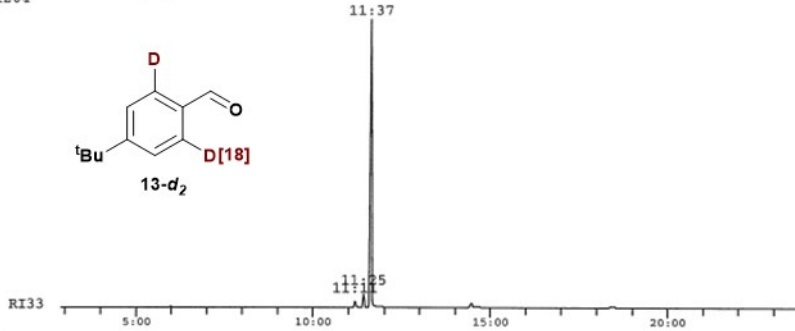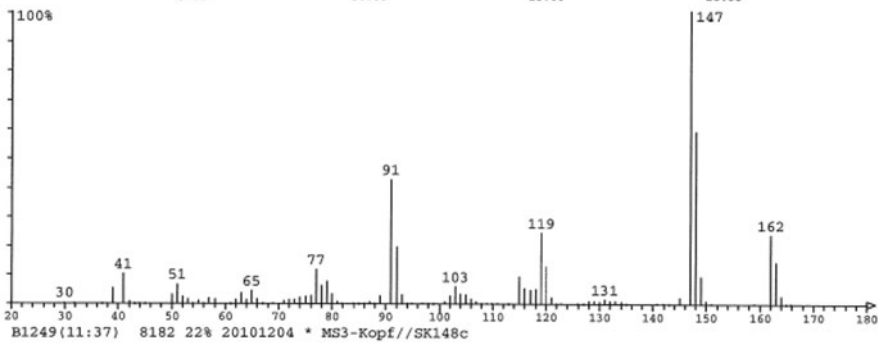

B1249(11:37) 8182 22% 20101204 \* MS3-Kopf//SK148c

|    |      |    |       |     |       |     |       |     |        |
|----|------|----|-------|-----|-------|-----|-------|-----|--------|
| 30 | 0.07 | 64 | 1.22  | 88  | 0.32  | 113 | 0.19  | 142 | 0.02   |
| 32 | 0.01 | 65 | 4.17  | 89  | 2.52  | 115 | 9.17  | 143 | 0.12   |
| 37 | 0.10 | 66 | 1.31  | 91  | 42.66 | 116 | 5.17  | 145 | 1.87   |
| 39 | 5.21 | 67 | 0.34  | 92  | 19.36 | 117 | 4.46  | 147 | 100.00 |
| 41 | 9.96 | 69 | 0.03  | 93  | 2.78  | 118 | 4.81  | 148 | 58.71  |
| 42 | 0.65 | 71 | 0.66  | 94  | 0.33  | 119 | 24.20 | 149 | 9.34   |
| 43 | 0.13 | 72 | 1.20  | 95  | 0.06  | 120 | 12.57 | 150 | 0.86   |
| 44 | 0.01 | 73 | 1.10  | 97  | 0.03  | 121 | 1.99  | 151 | 0.06   |
| 45 | 0.11 | 74 | 1.91  | 98  | 0.17  | 122 | 0.24  | 159 | 0.04   |
| 50 | 2.73 | 75 | 2.19  | 99  | 0.12  | 123 | 0.04  | 162 | 23.80  |
| 51 | 6.45 | 76 | 2.44  | 101 | 0.64  | 126 | 0.05  | 163 | 14.17  |
| 52 | 2.24 | 77 | 11.64 | 102 | 2.54  | 127 | 0.25  | 164 | 2.42   |
| 53 | 1.45 | 78 | 6.01  | 103 | 5.74  | 128 | 0.67  | 165 | 0.24   |
| 54 | 0.23 | 79 | 7.34  | 104 | 3.26  | 129 | 0.94  | 166 | 0.02   |
| 55 | 0.76 | 80 | 3.01  | 105 | 2.85  | 130 | 0.42  |     |        |
| 56 | 0.28 | 81 | 0.39  | 106 | 1.31  | 131 | 1.35  |     |        |
| 57 | 1.56 | 82 | 0.02  | 107 | 0.40  | 132 | 0.85  |     |        |
| 58 | 1.41 | 84 | 0.02  | 108 | 0.14  | 133 | 0.89  |     |        |
| 61 | 0.26 | 85 | 0.12  | 109 | 0.04  | 134 | 0.53  |     |        |
| 62 | 1.05 | 86 | 0.36  | 110 | 0.07  | 135 | 0.10  |     |        |
| 63 | 3.38 | 87 | 0.65  | 111 | 0.04  | 141 | 0.02  |     |        |

B1249(11:37) 8182 22% 20101204 \* MS3-Kopf//SK148c

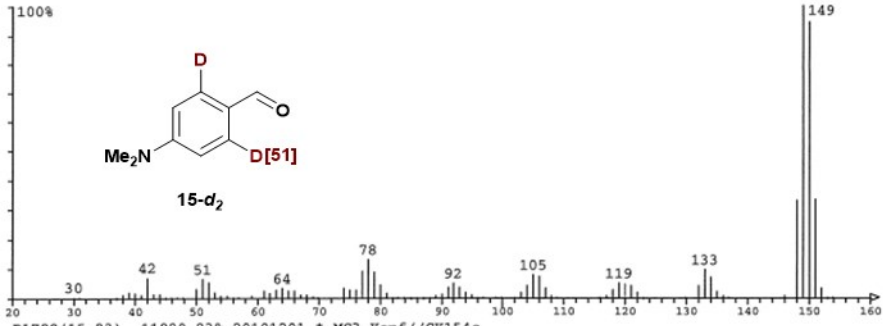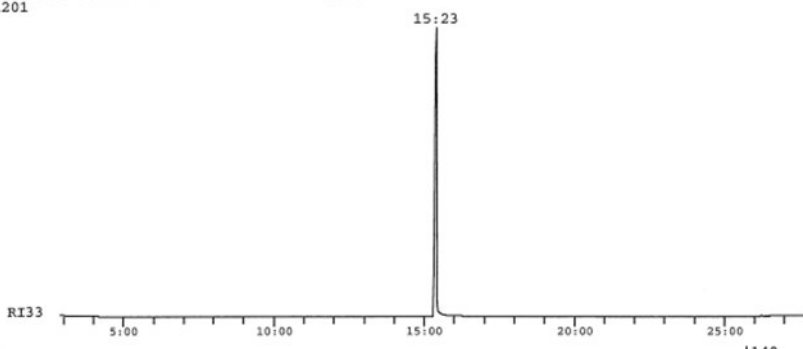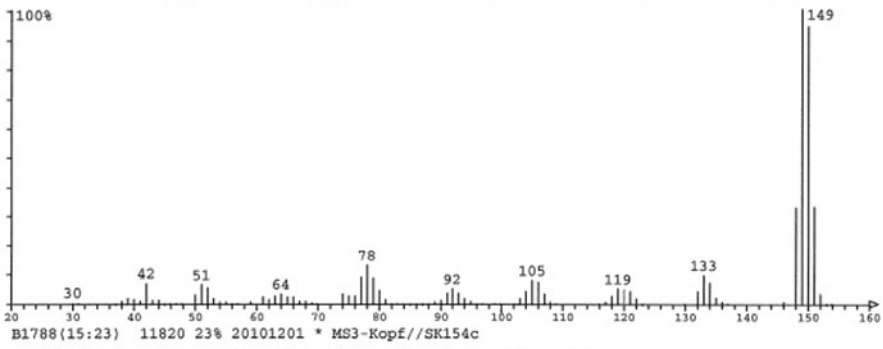

|    |      |    |       |     |      |     |       |     |        |
|----|------|----|-------|-----|------|-----|-------|-----|--------|
| 30 | 0.12 | 57 | 0.02  | 83  | 0.05 | 106 | 7.29  | 149 | 100.00 |
| 31 | 0.03 | 59 | 0.63  | 84  | 0.02 | 107 | 3.08  | 150 | 94.29  |
| 37 | 0.29 | 61 | 2.18  | 85  | 0.10 | 108 | 0.49  | 151 | 33.14  |
| 38 | 0.68 | 62 | 1.43  | 86  | 0.16 | 109 | 0.05  | 152 | 3.17   |
| 39 | 1.71 | 63 | 2.47  | 87  | 0.22 | 116 | 0.07  | 153 | 0.30   |
| 40 | 1.38 | 64 | 3.05  | 88  | 0.24 | 117 | 0.50  | 154 | 0.02   |
| 41 | 0.91 | 65 | 2.23  | 89  | 0.49 | 118 | 2.62  |     |        |
| 42 | 6.74 | 66 | 2.19  | 90  | 1.08 | 119 | 4.74  |     |        |
| 43 | 1.05 | 67 | 0.83  | 91  | 3.44 | 120 | 4.56  |     |        |
| 44 | 1.06 | 68 | 0.67  | 92  | 4.90 | 121 | 3.91  |     |        |
| 45 | 0.16 | 69 | 0.36  | 93  | 3.37 | 122 | 1.58  |     |        |
| 46 | 0.08 | 70 | 0.04  | 94  | 1.69 | 123 | 0.19  |     |        |
| 47 | 0.06 | 74 | 3.18  | 95  | 0.81 | 130 | 0.04  |     |        |
| 48 | 0.04 | 75 | 2.47  | 96  | 0.18 | 132 | 3.93  |     |        |
| 50 | 2.93 | 76 | 2.54  | 97  | 0.01 | 133 | 9.59  |     |        |
| 51 | 6.35 | 77 | 8.98  | 99  | 0.06 | 134 | 6.81  |     |        |
| 52 | 5.11 | 78 | 13.02 | 100 | 0.04 | 135 | 1.99  |     |        |
| 53 | 1.78 | 79 | 8.56  | 102 | 0.29 | 136 | 0.44  |     |        |
| 54 | 0.63 | 80 | 4.35  | 103 | 1.54 | 137 | 0.07  |     |        |
| 55 | 0.40 | 81 | 1.52  | 104 | 4.13 | 146 | 0.41  |     |        |
| 56 | 0.11 | 82 | 0.22  | 105 | 7.87 | 148 | 32.81 |     |        |

B1788 (15:23) 11820 23% 20101201 \* MS3-Kopf//SK154c

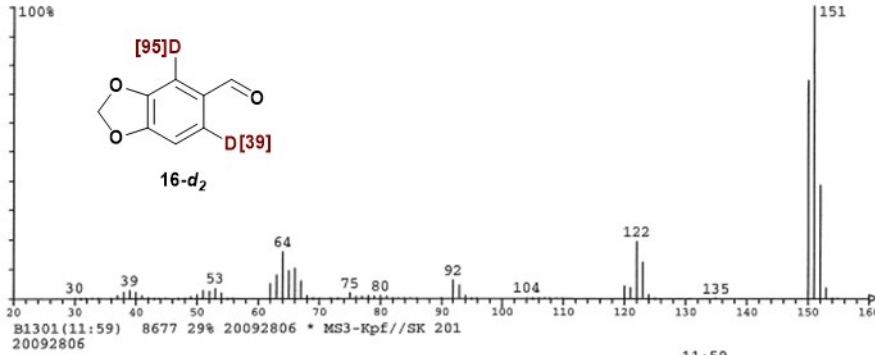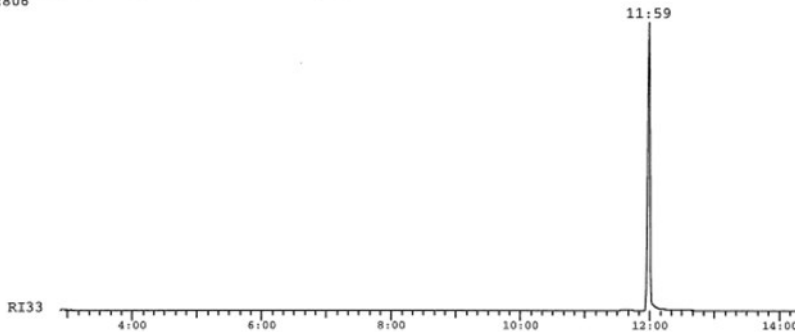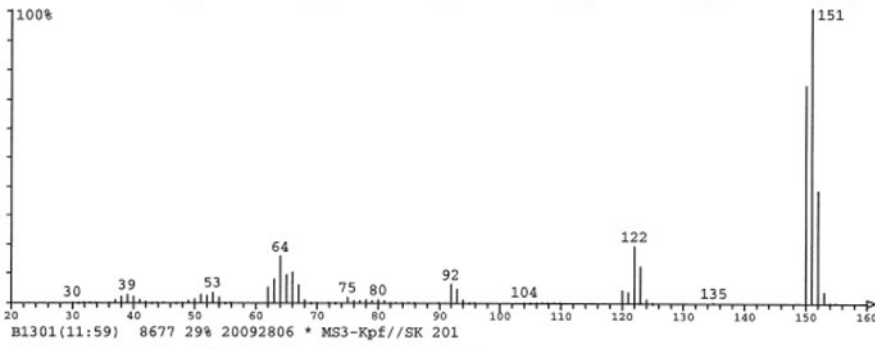

|    |      |    |       |     |      |     |        |
|----|------|----|-------|-----|------|-----|--------|
| 30 | 0.32 | 53 | 3.24  | 81  | 0.49 | 122 | 19.01  |
| 31 | 0.12 | 54 | 1.70  | 82  | 0.10 | 123 | 12.04  |
| 32 | 0.07 | 55 | 0.26  | 83  | 0.02 | 124 | 1.10   |
| 33 | 0.06 | 56 | 0.06  | 84  | 0.02 | 125 | 0.12   |
| 34 | 0.03 | 62 | 4.79  | 85  | 0.02 | 135 | 0.03   |
| 36 | 0.16 | 63 | 7.86  | 86  | 0.03 | 150 | 74.33  |
| 37 | 0.87 | 64 | 15.59 | 90  | 0.06 | 151 | 100.00 |
| 38 | 1.85 | 65 | 9.26  | 92  | 5.93 | 152 | 38.23  |
| 39 | 2.62 | 66 | 10.03 | 93  | 4.23 | 153 | 3.48   |
| 40 | 2.02 | 67 | 5.78  | 94  | 0.84 | 154 | 0.34   |
| 41 | 0.67 | 68 | 0.71  | 95  | 0.29 | 155 | 0.02   |
| 42 | 0.36 | 69 | 0.29  | 96  | 0.07 |     |        |
| 43 | 0.11 | 70 | 0.09  | 104 | 0.17 |     |        |
| 44 | 0.03 | 72 | 0.03  | 105 | 0.17 |     |        |
| 45 | 0.02 | 73 | 0.17  | 106 | 0.12 |     |        |
| 47 | 0.17 | 75 | 1.59  | 107 | 0.05 |     |        |
| 48 | 0.13 | 76 | 0.48  | 108 | 0.03 |     |        |
| 49 | 0.42 | 77 | 0.54  | 109 | 0.03 |     |        |
| 50 | 1.19 | 78 | 0.79  | 110 | 0.04 |     |        |
| 51 | 2.42 | 79 | 0.43  | 120 | 3.89 |     |        |
| 52 | 2.25 | 80 | 0.84  | 121 | 3.32 |     |        |

B1301(11:59)8677 29% 20092806 \* MS3-Kpf//SK 201

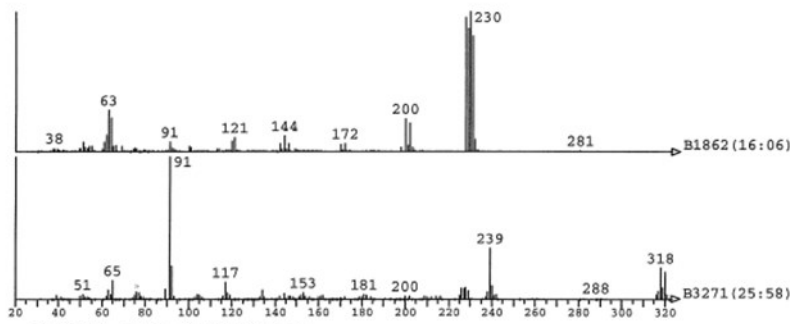

20091003 \* MS3-Kopf//SK151-f1  
20091003

\*1

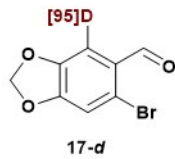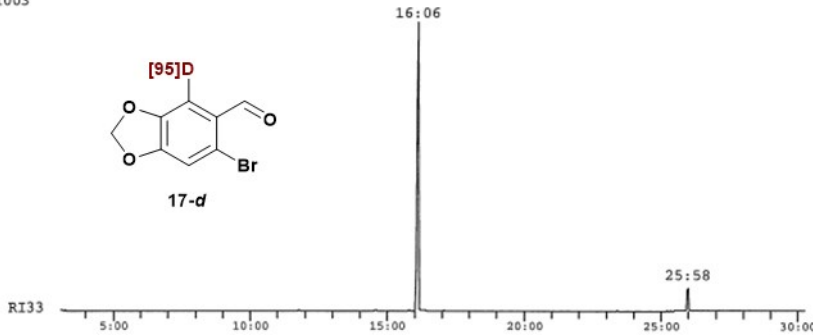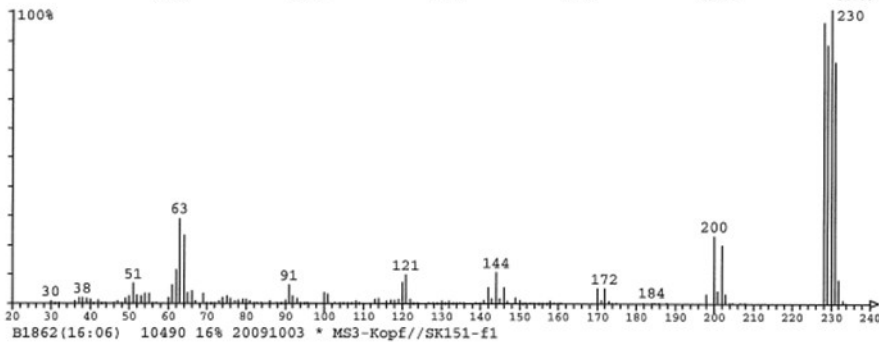

B1862(16:06) 10490 16% 20091003 \* MS3-Kopf//SK151-f1

|    |      |    |       |     |      |     |      |     |       |     |       |     |        |
|----|------|----|-------|-----|------|-----|------|-----|-------|-----|-------|-----|--------|
| 30 | 0.59 | 55 | 3.14  | 79  | 1.07 | 106 | 0.21 | 133 | 0.25  | 157 | 0.09  | 204 | 0.27   |
| 31 | 0.19 | 56 | 0.23  | 80  | 1.04 | 107 | 0.28 | 134 | 0.29  | 158 | 0.55  | 205 | 0.02   |
| 32 | 0.11 | 57 | 0.03  | 81  | 0.62 | 108 | 0.46 | 135 | 0.04  | 159 | 0.08  | 207 | 0.01   |
| 36 | 0.37 | 60 | 1.54  | 82  | 0.31 | 109 | 0.27 | 136 | 0.05  | 160 | 0.33  | 208 | 0.02   |
| 37 | 1.75 | 61 | 6.13  | 83  | 0.07 | 113 | 1.19 | 139 | 0.04  | 161 | 0.03  | 228 | 95.68  |
| 38 | 1.75 | 62 | 11.35 | 84  | 0.08 | 114 | 1.40 | 140 | 0.10  | 170 | 4.79  | 229 | 88.11  |
| 39 | 1.48 | 63 | 28.79 | 86  | 0.42 | 116 | 0.37 | 141 | 0.69  | 171 | 0.90  | 230 | 100.00 |
| 40 | 1.13 | 64 | 23.20 | 88  | 0.03 | 117 | 0.92 | 142 | 5.29  | 172 | 4.83  | 231 | 82.47  |
| 41 | 0.14 | 65 | 3.29  | 89  | 0.16 | 118 | 0.85 | 143 | 1.52  | 173 | 0.54  | 232 | 7.80   |
| 42 | 0.82 | 66 | 4.00  | 90  | 0.77 | 119 | 1.12 | 144 | 10.41 | 174 | 0.18  | 233 | 0.86   |
| 43 | 0.09 | 67 | 0.42  | 91  | 6.11 | 120 | 6.79 | 145 | 1.29  | 175 | 0.03  | 234 | 0.06   |
| 44 | 0.00 | 69 | 3.24  | 92  | 2.27 | 121 | 9.53 | 146 | 5.23  | 182 | 0.10  |     |        |
| 46 | 0.12 | 70 | 0.35  | 93  | 1.36 | 122 | 1.09 | 147 | 0.40  | 184 | 0.11  |     |        |
| 47 | 0.43 | 71 | 0.18  | 94  | 0.35 | 123 | 0.29 | 149 | 1.78  | 185 | 0.04  |     |        |
| 48 | 0.32 | 72 | 0.30  | 95  | 0.17 | 124 | 0.02 | 150 | 0.71  | 186 | 0.05  |     |        |
| 49 | 1.29 | 73 | 0.65  | 96  | 0.03 | 127 | 0.02 | 151 | 0.14  | 188 | 0.02  |     |        |
| 50 | 2.38 | 74 | 1.59  | 100 | 3.33 | 128 | 0.07 | 152 | 0.04  | 198 | 2.80  |     |        |
| 51 | 6.48 | 75 | 2.36  | 101 | 2.82 | 129 | 0.19 | 153 | 0.03  | 200 | 22.76 |     |        |
| 52 | 2.57 | 76 | 1.35  | 103 | 0.07 | 130 | 0.55 | 154 | 0.05  | 201 | 4.05  |     |        |
| 53 | 2.32 | 77 | 0.66  | 104 | 0.25 | 131 | 0.34 | 155 | 0.12  | 202 | 19.66 |     |        |
| 54 | 3.17 | 78 | 0.66  | 105 | 0.13 | 132 | 0.51 | 156 | 0.23  | 203 | 2.83  |     |        |

B1862(16:06) 10490 16% 20091003 \* MS3-Kopf//SK151-f1

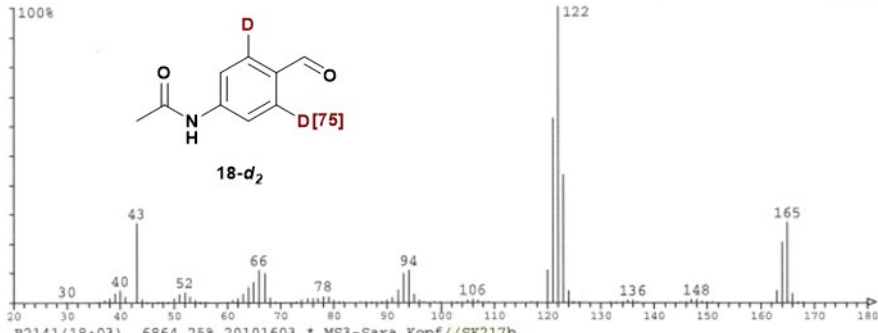

B2141(18:03) 6864 25% 20101603 \* MS3-Sara Kopf//SK217b  
20101603

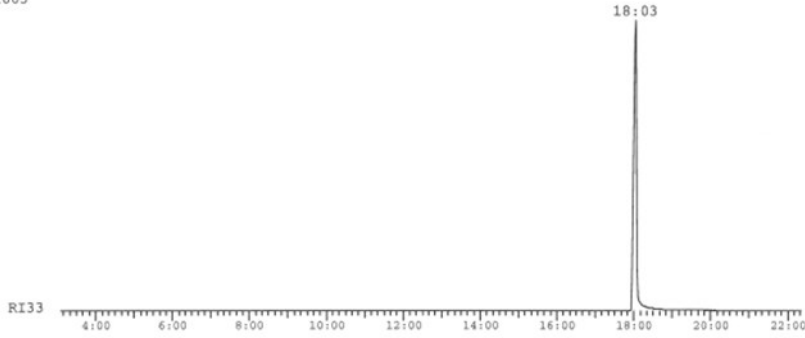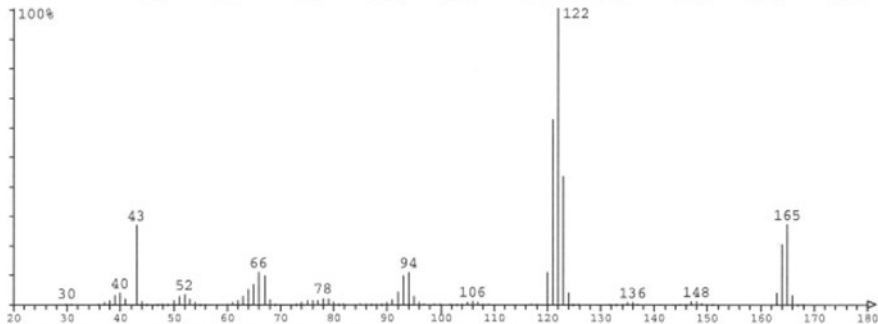

B2141(18:03) 6864 25% 20101603 \* MS3-Sara Kopf//SK217b

|    |       |    |       |     |       |     |        |     |       |
|----|-------|----|-------|-----|-------|-----|--------|-----|-------|
| 30 | 0.07  | 60 | 0.11  | 86  | 0.08  | 109 | 0.04   | 150 | 0.33  |
| 31 | 0.03  | 61 | 0.45  | 87  | 0.16  | 117 | 0.04   | 151 | 0.03  |
| 36 | 0.03  | 62 | 1.05  | 88  | 0.19  | 118 | 0.11   | 163 | 3.64  |
| 37 | 0.45  | 63 | 2.56  | 89  | 0.21  | 120 | 10.78  | 164 | 20.38 |
| 38 | 1.06  | 64 | 4.87  | 90  | 0.43  | 121 | 62.33  | 165 | 27.03 |
| 39 | 2.83  | 65 | 6.60  | 91  | 1.32  | 122 | 100.00 | 166 | 2.93  |
| 40 | 3.81  | 66 | 10.62 | 92  | 4.08  | 123 | 43.24  | 167 | 0.31  |
| 41 | 1.67  | 67 | 9.49  | 93  | 9.61  | 124 | 3.70   | 168 | 0.03  |
| 43 | 26.61 | 68 | 1.52  | 94  | 10.68 | 125 | 0.26   |     |       |
| 44 | 0.85  | 69 | 0.14  | 95  | 2.65  | 126 | 0.02   |     |       |
| 45 | 0.11  | 73 | 0.17  | 96  | 0.45  | 132 | 0.03   |     |       |
| 47 | 0.12  | 74 | 0.65  | 97  | 0.03  | 133 | 0.10   |     |       |
| 48 | 0.03  | 75 | 1.11  | 99  | 0.02  | 134 | 0.20   |     |       |
| 49 | 0.16  | 76 | 0.97  | 100 | 0.03  | 135 | 0.40   |     |       |
| 50 | 1.09  | 77 | 1.12  | 102 | 0.03  | 136 | 0.47   |     |       |
| 51 | 2.42  | 78 | 1.81  | 103 | 0.09  | 137 | 0.08   |     |       |
| 52 | 3.15  | 79 | 1.77  | 104 | 0.19  | 145 | 0.05   |     |       |
| 53 | 1.69  | 80 | 0.44  | 105 | 0.39  | 146 | 0.16   |     |       |
| 54 | 0.55  | 81 | 0.21  | 106 | 0.69  | 147 | 0.70   |     |       |
| 55 | 0.28  | 82 | 0.04  | 107 | 0.52  | 148 | 0.78   |     |       |
| 56 | 0.08  | 85 | 0.03  | 108 | 0.20  | 149 | 0.36   |     |       |

B2141(18:03)6864 25% 20101603 \* MS3-Sara Kopf//SK217b

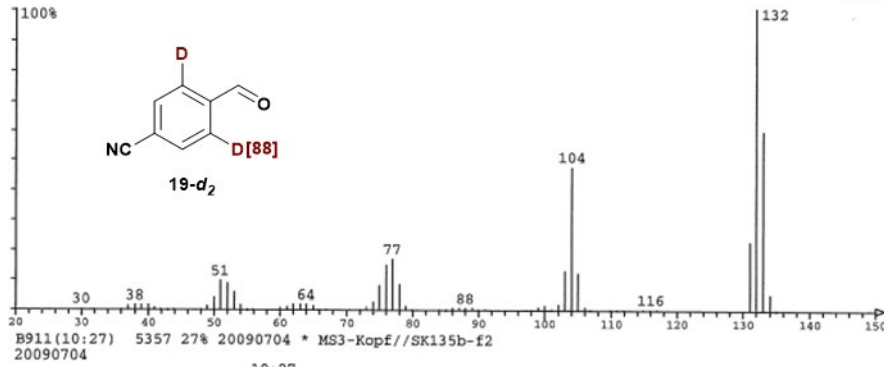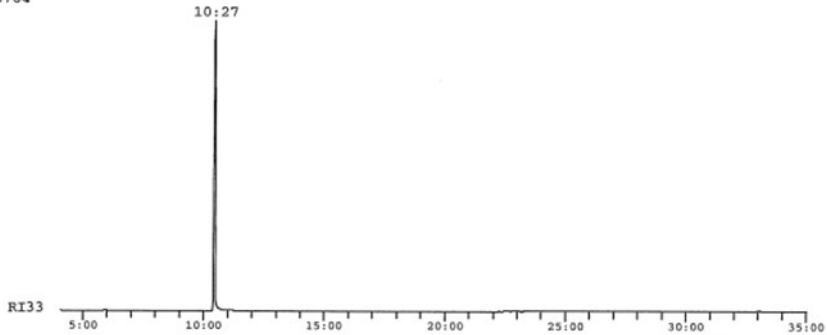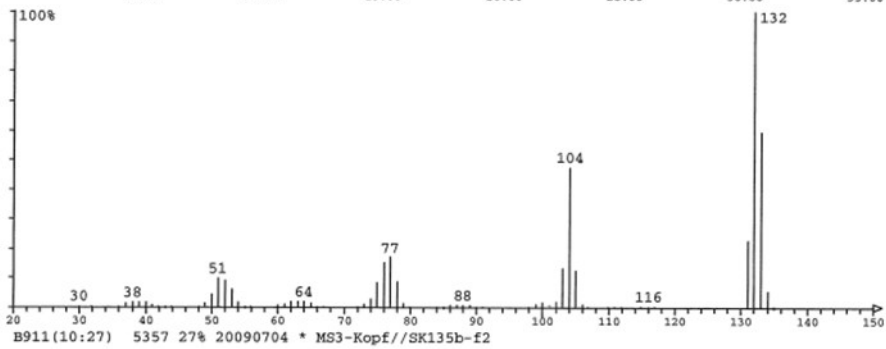

|    |      |    |       |     |        |     |       |
|----|------|----|-------|-----|--------|-----|-------|
| 30 | 0.11 | 61 | 0.87  | 89  | 0.49   | 133 | 59.48 |
| 32 | 0.02 | 62 | 1.63  | 90  | 0.22   | 134 | 5.17  |
| 36 | 0.21 | 63 | 1.67  | 91  | 0.04   | 135 | 0.32  |
| 37 | 0.97 | 64 | 1.77  | 98  | 0.24   |     |       |
| 38 | 1.47 | 65 | 1.18  | 99  | 0.87   |     |       |
| 39 | 1.39 | 66 | 0.26  | 100 | 1.39   |     |       |
| 40 | 1.40 | 67 | 0.05  | 101 | 0.63   |     |       |
| 41 | 0.65 | 72 | 0.25  | 102 | 1.71   |     |       |
| 42 | 0.03 | 73 | 0.79  | 103 | 12.98  |     |       |
| 43 | 0.14 | 74 | 2.66  | 104 | 47.35  |     |       |
| 44 | 0.04 | 75 | 8.16  | 105 | 12.24  |     |       |
| 48 | 0.31 | 76 | 14.69 | 106 | 0.87   |     |       |
| 49 | 1.02 | 77 | 16.86 | 107 | 0.05   |     |       |
| 50 | 3.94 | 78 | 8.29  | 110 | 0.03   |     |       |
| 51 | 9.44 | 79 | 1.11  | 111 | 0.05   |     |       |
| 52 | 8.50 | 80 | 0.07  | 112 | 0.03   |     |       |
| 53 | 5.80 | 84 | 0.25  | 115 | 0.06   |     |       |
| 54 | 1.39 | 85 | 0.28  | 116 | 0.09   |     |       |
| 55 | 0.11 | 86 | 0.58  | 117 | 0.03   |     |       |
| 56 | 0.05 | 87 | 0.60  | 131 | 22.53  |     |       |
| 60 | 0.38 | 88 | 0.61  | 132 | 100.00 |     |       |

B911 (10:27) 5357 27% 20090704 \* MS3-Kopf//SK135b-f2

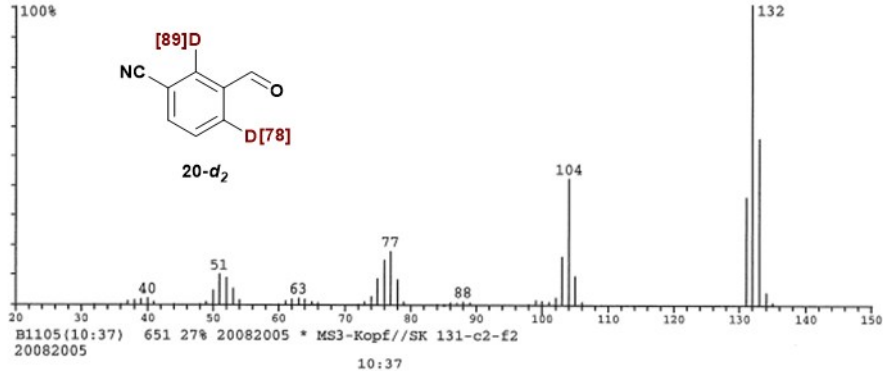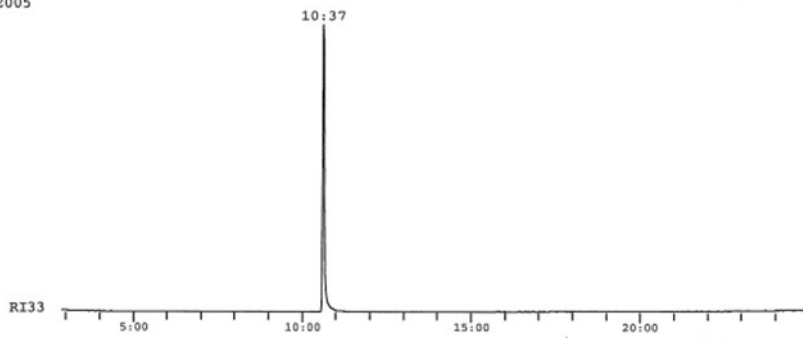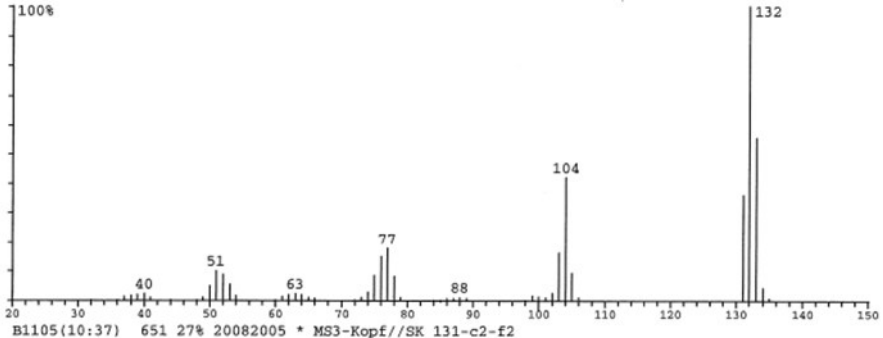

|    |      |     |       |     |        |
|----|------|-----|-------|-----|--------|
| 32 | 0.17 | 66  | 0.52  | 104 | 41.93  |
| 36 | 0.30 | 72  | 0.24  | 105 | 9.14   |
| 37 | 1.12 | 73  | 0.85  | 106 | 0.85   |
| 38 | 1.42 | 74  | 2.61  | 131 | 36.06  |
| 39 | 1.81 | 75  | 8.23  | 132 | 100.00 |
| 40 | 1.88 | 76  | 14.62 | 133 | 55.79  |
| 41 | 0.95 | 77  | 17.60 | 134 | 3.94   |
| 44 | 0.15 | 78  | 8.06  | 135 | 0.48   |
| 48 | 0.29 | 79  | 0.95  |     |        |
| 49 | 0.91 | 84  | 0.28  |     |        |
| 50 | 4.71 | 85  | 0.29  |     |        |
| 51 | 9.75 | 86  | 0.62  |     |        |
| 52 | 8.54 | 87  | 0.54  |     |        |
| 53 | 5.11 | 88  | 0.69  |     |        |
| 54 | 1.32 | 89  | 0.55  |     |        |
| 60 | 0.31 | 98  | 0.36  |     |        |
| 61 | 1.02 | 99  | 1.37  |     |        |
| 62 | 1.75 | 100 | 1.05  |     |        |
| 63 | 1.84 | 101 | 0.69  |     |        |
| 64 | 1.80 | 102 | 2.17  |     |        |
| 65 | 0.86 | 103 | 15.76 |     |        |

B1105(10:37)651 27% 20082005 \* MS3-Kopf//SK 131-c2-f2

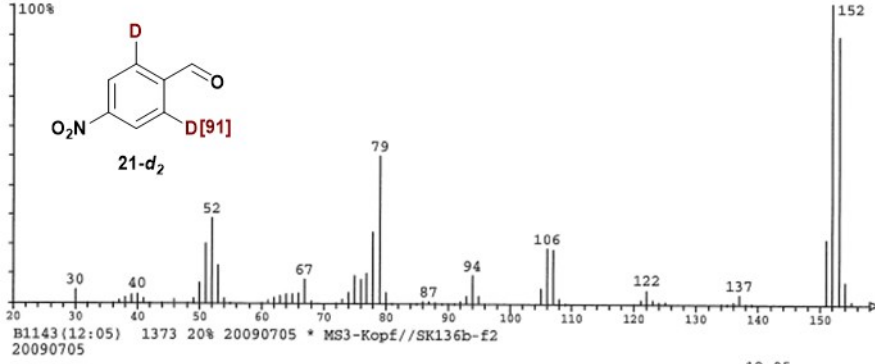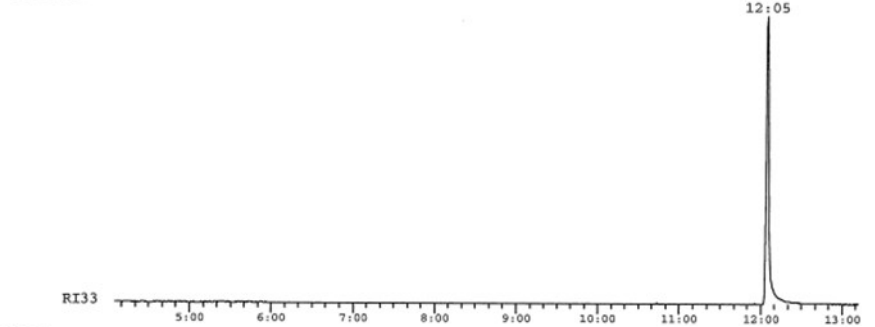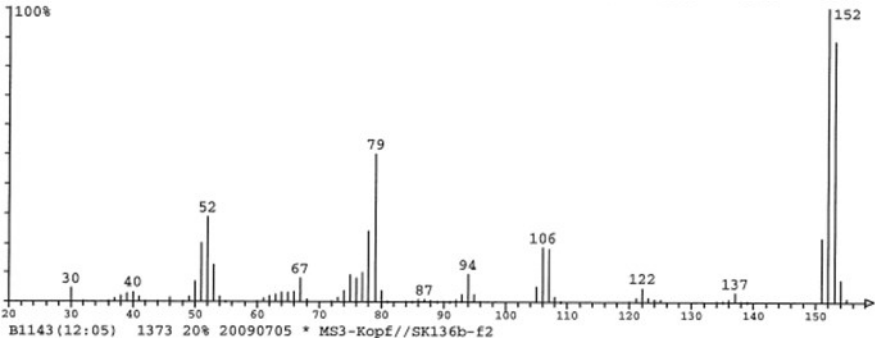

|    |       |    |       |     |       |     |        |
|----|-------|----|-------|-----|-------|-----|--------|
| 30 | 4.23  | 62 | 1.66  | 88  | 0.37  | 135 | 0.27   |
| 32 | 0.09  | 63 | 2.20  | 89  | 0.29  | 136 | 0.44   |
| 36 | 0.23  | 64 | 2.76  | 90  | 0.20  | 137 | 2.74   |
| 37 | 0.84  | 65 | 2.87  | 91  | 0.21  | 138 | 0.28   |
| 38 | 1.71  | 66 | 3.26  | 92  | 0.37  | 139 | 0.17   |
| 39 | 2.40  | 67 | 7.75  | 93  | 2.39  | 151 | 21.77  |
| 40 | 2.95  | 68 | 0.63  | 94  | 9.33  | 152 | 100.00 |
| 41 | 1.35  | 72 | 0.15  | 95  | 2.19  | 153 | 88.86  |
| 42 | 0.16  | 73 | 1.01  | 96  | 0.26  | 154 | 7.32   |
| 44 | 0.18  | 74 | 3.52  | 105 | 4.86  | 155 | 0.95   |
| 46 | 1.07  | 75 | 8.93  | 106 | 18.56 |     |        |
| 48 | 0.18  | 76 | 7.71  | 107 | 17.96 |     |        |
| 49 | 1.36  | 77 | 9.76  | 108 | 1.41  |     |        |
| 50 | 6.64  | 78 | 24.10 | 109 | 0.16  |     |        |
| 51 | 20.03 | 79 | 49.73 | 120 | 0.12  |     |        |
| 52 | 28.72 | 80 | 3.54  | 121 | 1.00  |     |        |
| 53 | 12.46 | 81 | 0.16  | 122 | 4.42  |     |        |
| 54 | 1.39  | 84 | 0.25  | 123 | 1.21  |     |        |
| 55 | 0.16  | 85 | 0.21  | 124 | 0.62  |     |        |
| 60 | 0.27  | 86 | 0.48  | 125 | 0.46  |     |        |
| 61 | 0.86  | 87 | 0.56  | 134 | 0.21  |     |        |

B1143(12:05)1373 20% 20090705 \* MS3-Ropf//SK136b-f2



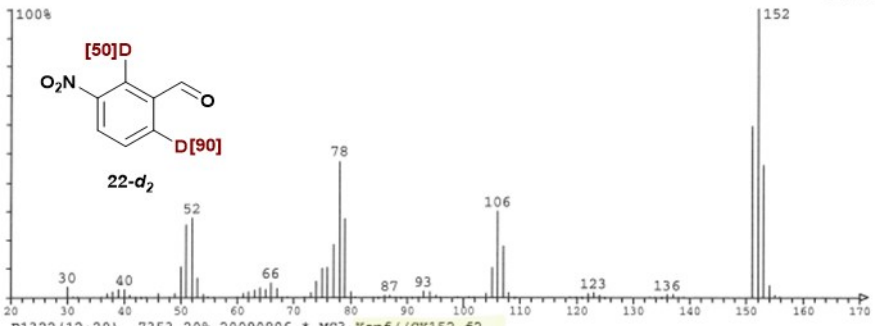

B1322(12:20) 7353 20% 20090806 \* MS3-Kopf//SK152-f2  
20090806

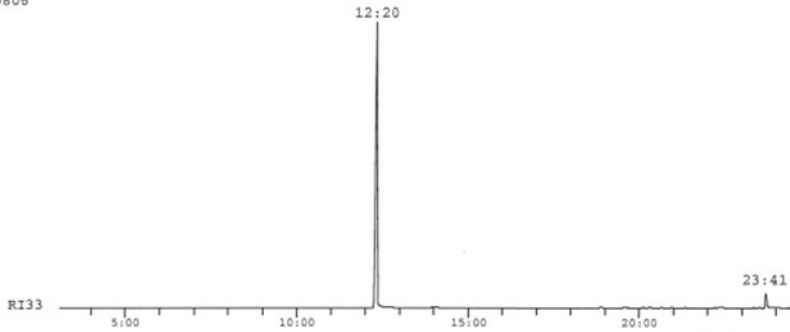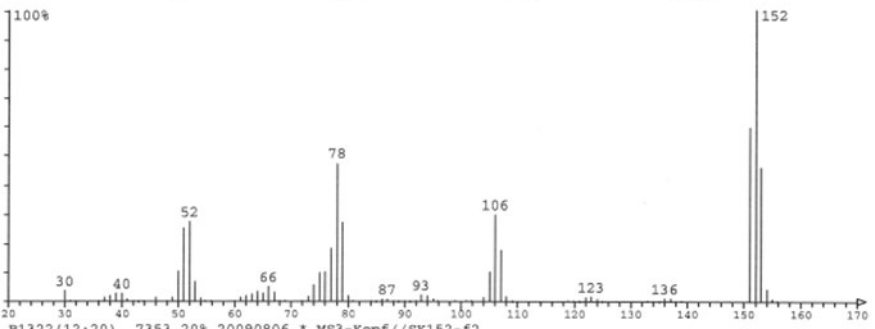

B1322(12:20) 7353 20% 20090806 \* MS3-Kopf//SK152-f2

|    |       |    |       |     |       |     |        |
|----|-------|----|-------|-----|-------|-----|--------|
| 30 | 3.30  | 56 | 0.05  | 84  | 0.11  | 109 | 0.09   |
| 31 | 0.05  | 60 | 0.29  | 85  | 0.29  | 119 | 0.02   |
| 32 | 0.03  | 61 | 1.17  | 86  | 0.47  | 120 | 0.07   |
| 36 | 0.18  | 62 | 1.81  | 87  | 0.48  | 121 | 0.23   |
| 37 | 1.08  | 63 | 2.35  | 88  | 0.32  | 122 | 1.12   |
| 38 | 1.77  | 64 | 3.06  | 89  | 0.25  | 123 | 1.32   |
| 39 | 2.41  | 65 | 2.43  | 90  | 0.14  | 124 | 0.53   |
| 40 | 2.53  | 66 | 4.86  | 91  | 0.14  | 125 | 0.11   |
| 41 | 0.59  | 67 | 2.97  | 92  | 0.36  | 133 | 0.03   |
| 42 | 0.09  | 68 | 0.23  | 93  | 1.84  | 134 | 0.05   |
| 43 | 0.08  | 69 | 0.03  | 94  | 1.64  | 135 | 0.12   |
| 44 | 0.04  | 72 | 0.16  | 95  | 0.38  | 136 | 0.85   |
| 46 | 1.08  | 73 | 1.32  | 96  | 0.04  | 137 | 0.70   |
| 48 | 0.16  | 74 | 5.34  | 99  | 0.02  | 138 | 0.08   |
| 49 | 1.19  | 75 | 9.78  | 101 | 0.04  | 139 | 0.03   |
| 50 | 10.30 | 76 | 10.22 | 102 | 0.03  | 151 | 59.13  |
| 51 | 25.22 | 77 | 18.09 | 104 | 1.19  | 152 | 100.00 |
| 52 | 27.41 | 78 | 47.08 | 105 | 10.18 | 153 | 45.71  |
| 53 | 6.57  | 79 | 27.22 | 106 | 29.74 | 154 | 3.99   |
| 54 | 0.80  | 80 | 1.75  | 107 | 17.49 | 155 | 0.39   |
| 55 | 0.07  | 81 | 0.07  | 108 | 1.36  | 156 | 0.03   |

B1322(12:20) 7353 20% 20090806 \* MS3-Kopf//SK152-f2

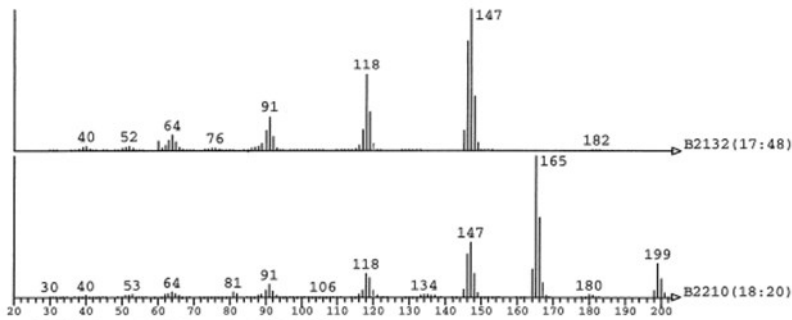

\*1

20100901 \* MS3-Sara Kopf//SK 208  
20100901

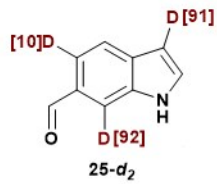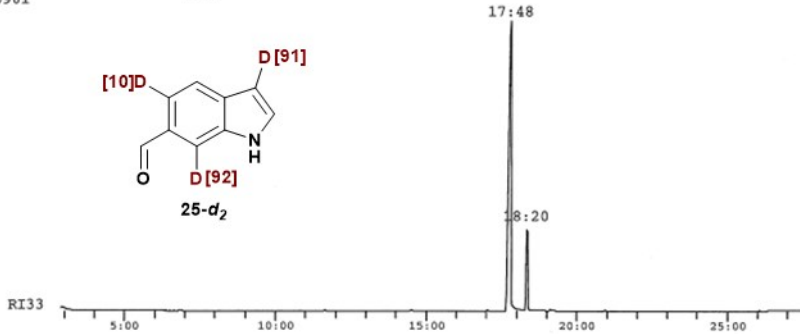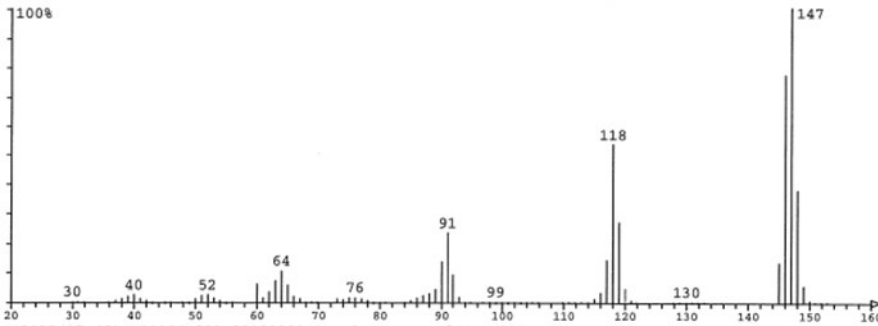

B2132 (17:48) 11104 22% 20100901 \* MS3-Sara Kopf//SK 208

|    |      |    |       |     |       |     |       |     |        |
|----|------|----|-------|-----|-------|-----|-------|-----|--------|
| 30 | 0.09 | 56 | 0.10  | 84  | 0.25  | 106 | 0.01  | 146 | 77.31  |
| 31 | 0.02 | 60 | 6.04  | 85  | 0.59  | 110 | 0.06  | 147 | 100.00 |
| 32 | 0.01 | 61 | 1.35  | 86  | 1.32  | 111 | 0.07  | 148 | 37.57  |
| 36 | 0.07 | 62 | 3.53  | 87  | 2.15  | 112 | 0.07  | 149 | 5.32   |
| 37 | 0.56 | 63 | 7.06  | 88  | 2.74  | 113 | 0.06  | 150 | 0.45   |
| 38 | 1.07 | 64 | 10.51 | 89  | 4.29  | 114 | 0.19  | 151 | 0.02   |
| 39 | 2.00 | 65 | 5.68  | 90  | 13.43 | 115 | 1.14  | 152 | 0.02   |
| 40 | 2.46 | 66 | 1.92  | 91  | 23.40 | 116 | 3.07  | 153 | 0.02   |
| 41 | 1.11 | 67 | 0.97  | 92  | 9.33  | 117 | 14.20 |     |        |
| 42 | 0.42 | 68 | 0.30  | 93  | 1.64  | 118 | 53.49 |     |        |
| 43 | 0.31 | 69 | 0.07  | 94  | 0.17  | 119 | 26.81 |     |        |
| 45 | 0.17 | 70 | 0.02  | 95  | 0.01  | 120 | 4.47  |     |        |
| 46 | 0.12 | 73 | 0.96  | 97  | 0.04  | 121 | 0.40  |     |        |
| 48 | 0.07 | 74 | 0.92  | 98  | 0.12  | 122 | 0.02  |     |        |
| 49 | 0.29 | 75 | 1.48  | 99  | 0.23  | 128 | 0.02  |     |        |
| 50 | 1.24 | 76 | 1.53  | 100 | 0.17  | 129 | 0.05  |     |        |
| 51 | 2.30 | 77 | 0.97  | 101 | 0.13  | 130 | 0.11  |     |        |
| 52 | 2.57 | 78 | 0.46  | 102 | 0.11  | 131 | 0.08  |     |        |
| 53 | 1.41 | 79 | 0.32  | 103 | 0.13  | 132 | 0.03  |     |        |
| 54 | 0.47 | 80 | 0.20  | 104 | 0.17  | 133 | 0.00  |     |        |
| 55 | 0.10 | 81 | 0.06  | 105 | 0.07  | 145 | 13.40 |     |        |

B2132 (17:48) 11104 22% 20100901 \* MS3-Sara Kopf//SK 208

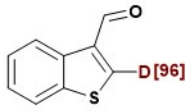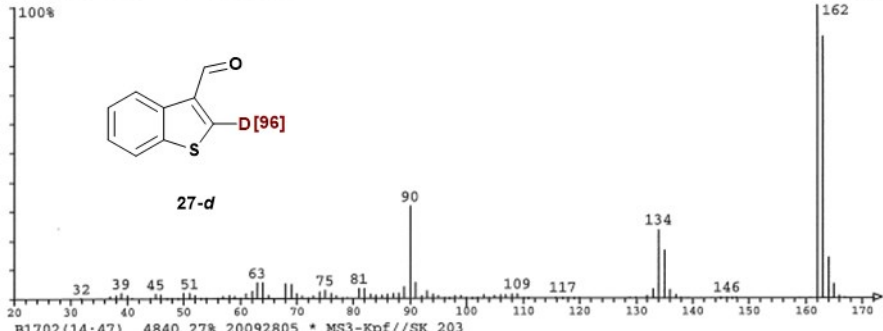

B1702 (14:47) 4840 27% 20092805 \* MS3-Kpf//SK 203  
20092805

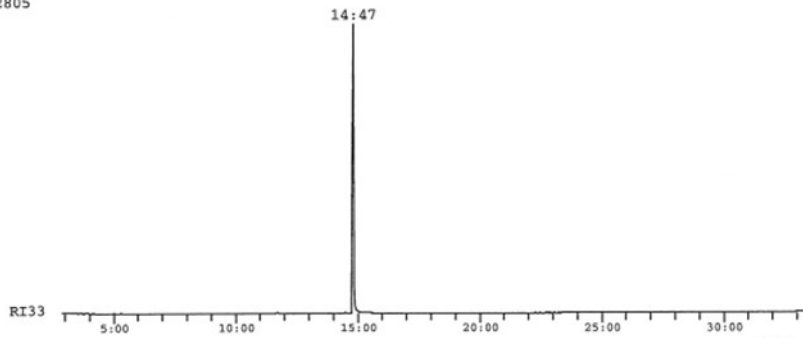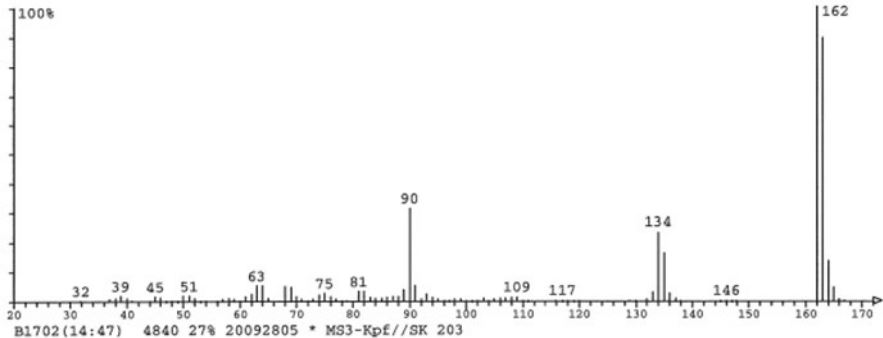

B1702 (14:47) 4840 27% 20092805 \* MS3-Kpf//SK 203

|    |      |    |      |     |       |     |       |     |        |
|----|------|----|------|-----|-------|-----|-------|-----|--------|
| 32 | 0.03 | 60 | 0.35 | 84  | 0.72  | 105 | 0.40  | 145 | 0.08   |
| 37 | 0.38 | 61 | 1.47 | 85  | 0.92  | 106 | 0.68  | 146 | 0.13   |
| 38 | 0.70 | 62 | 2.33 | 86  | 1.06  | 107 | 0.71  | 147 | 0.08   |
| 39 | 1.75 | 63 | 5.24 | 87  | 1.27  | 108 | 1.00  | 148 | 0.03   |
| 40 | 0.87 | 64 | 5.16 | 88  | 1.49  | 109 | 1.24  | 162 | 100.00 |
| 41 | 0.07 | 65 | 0.73 | 89  | 3.65  | 110 | 0.18  | 163 | 89.42  |
| 44 | 0.11 | 68 | 4.74 | 90  | 31.30 | 111 | 0.10  | 164 | 13.70  |
| 45 | 1.35 | 69 | 4.54 | 91  | 5.07  | 116 | 0.04  | 165 | 4.47   |
| 46 | 1.19 | 70 | 1.36 | 92  | 0.53  | 117 | 0.17  | 166 | 0.39   |
| 47 | 0.11 | 71 | 0.57 | 93  | 2.39  | 118 | 0.08  | 167 | 0.05   |
| 48 | 0.12 | 72 | 0.20 | 94  | 1.22  | 119 | 0.08  |     |        |
| 49 | 0.34 | 73 | 0.60 | 95  | 0.58  | 120 | 0.10  |     |        |
| 50 | 1.53 | 74 | 1.95 | 96  | 0.29  | 129 | 0.08  |     |        |
| 51 | 1.68 | 75 | 2.52 | 97  | 0.17  | 130 | 0.07  |     |        |
| 52 | 0.91 | 76 | 1.45 | 98  | 0.50  | 132 | 0.52  |     |        |
| 53 | 0.23 | 77 | 0.49 | 99  | 0.53  | 133 | 2.95  |     |        |
| 54 | 0.28 | 78 | 0.20 | 100 | 0.26  | 134 | 23.29 |     |        |
| 56 | 0.14 | 79 | 0.03 | 101 | 0.19  | 135 | 16.13 |     |        |
| 57 | 0.52 | 81 | 3.22 | 102 | 0.26  | 136 | 2.58  |     |        |
| 58 | 0.85 | 82 | 3.07 | 103 | 0.93  | 137 | 0.74  |     |        |
| 59 | 0.52 | 83 | 1.09 | 104 | 0.17  | 138 | 0.08  |     |        |

B1702 (14:47) 4840 27% 20092805 \* MS3-Kpf//SK 203
